# Supplementary material
Source: Research Square preprint supplement (doi:10.21203/rs.3.rs-9557974/v1)
Supplement: Supplementary file 2 [file 9c09ccbebf13e7721c19725b.docx]

| *Tab 1. Overview of quantitative trait loci (QTL) associated with fitness differences of F2 plants in stressful S soil identified by QTLseqr. QTLs were identified as 500kb regions with a q-value above the FDR of 0.05.* | | | | | | | | |
| --- | --- | --- | --- | --- | --- | --- | --- | --- |
|  |  |  |  |  |  |  |  |  |
| **Chromosome** | **QTL** | **Start** | **End** | **Length (bp)** | **n SNPs** | **peak**Δ**SNP** | **Max G'** | ***q*-value** |
| 1 | 1 | 23263871 | 23367747 | 103876 | 1200 | 0.008 | 3.247 | 0.046 |
| 4 | 2 | 28494 | 427189 | 398695 | 5483 | -0.010 | 3.572 | 0.021 |
| 6 | 3 | 1702611 | 2436210 | 733599 | 8605 | -0.011 | 3.490 | 0.019 |
| 6 | 4 | 6950657 | 7281855 | 331198 | 4731 | -0.005 | 3.290 | 0.040 |
| 7 | 5 | 1362 | 437576 | 436214 | 4950 | -0.010 | 3.439 | 0.022 |
