# Supplementary material
Source: Research Square preprint supplement (doi:10.21203/rs.3.rs-9557974/v1)
Supplement: Supplementary file 2 [file 9738a24eafacb8bafca70da2.xlsx]

## Sheet: S1
Supplementary data S1: Sequence processing and quality assessment of each sequenced sample.
Sample	raw_total_sequences	reads_mapped	reads_properly_paired	reads_duplicated	reads_after_duplic_removal	average_length	reads_mapped_percent	reads_properly_paired_percent	reads_duplicated_percent	coverage_aftermapping	Bulk		after mapping	aftervar calling info from bcftools stats
3861	3630	3367	2816	67	2749	143	92.7548	77.5758	1.84573	0.00189907	high	low	2.25	2.45
4062	5978823	1972118	1708594	422017	1286577	147	32.9851	28.5774	7.05853	0.913656	low	high	2.41	2.72
3749	7903757	2057705	1787250	436570	1350680	147	26.0345	22.6127	5.52358	0.959179	low
3684	2780364	2614091	2229724	398292	1831432	146	94.0197	80.1954	14.3252	1.29173	high
3832	7509725	2880415	2502044	493108	2008936	147	38.3558	33.3174	6.56626	1.42664	low
3705	6537810	3191699	2763946	738351	2025595	147	48.8191	42.2763	11.2936	1.43847	low
3923	5442464	2917000	2531014	494548	2036466	147	53.597	46.5049	9.08684	1.44619	low
3682	3079093	2882137	2465226	404519	2060707	146	93.6034	80.0634	13.1376	1.45345	high
3694	3127561	2940210	2517036	456307	2060729	146	94.0097	80.4792	14.5899	1.45346	high
3813	7331042	3295023	2851434	776785	2074649	147	44.9462	38.8953	10.5958	1.4733	low
3656	5719032	3108492	2695536	556536	2139000	147	54.3535	47.1327	9.7313	1.519	low
4208	6740806	3341732	2893702	751364	2142338	147	49.5747	42.9281	11.1465	1.52137	low
4022	6603006	3477686	3035884	889941	2145943	147	52.6682	45.9773	13.4778	1.52393	low
3908	5589031	3458932	2992020	775372	2216648	147	61.8879	53.5338	13.8731	1.57414	low
3827	7748396	3551761	3088166	855348	2232818	147	45.8387	39.8556	11.039	1.58562	low
3614	6513290	3267530	2844886	587786	2257100	147	50.1671	43.6782	9.02441	1.60287	low
3964	3611625	3408827	2924220	622333	2301887	146	94.3849	80.9669	17.2314	1.62355	high
3844	4407802	3480517	3052492	759565	2292927	147	78.9626	69.252	17.2323	1.62831	low
3647	8369035	3680668	3193230	855055	2338175	147	43.9796	38.1553	10.2169	1.66044	low
3933	5976694	3580340	3088896	717872	2371024	147	59.905	51.6824	12.0112	1.68377	low
3913	6263544	3679212	3190472	781542	2408930	146	58.7401	50.9372	12.4776	1.69905	low
3756	3974423	3665129	3119324	614399	2504925	146	92.2179	78.485	15.4588	1.76676	high
3572	3817885	3585496	3066566	563259	2503307	147	93.9131	80.3211	14.7532	1.77771	high
3485	4361704	4085909	3441308	901112	2540196	146	93.6769	78.8982	20.6596	1.79164	high
3583	3914817	3676382	3150634	570905	2579729	146	93.9094	80.4797	14.5832	1.81952	high
3902	6164276	4081913	3525576	921567	2604009	147	66.2189	57.1937	14.9501	1.84922	low
3911	6952765	4132883	3577726	960801	2616925	147	59.4423	51.4576	13.819	1.8584	low
4129	6428179	4054451	3535706	918009	2617697	147	63.0731	55.0032	14.281	1.85894	low
3528	4324843	4030149	3415548	749456	2666092	147	93.186	78.9751	17.3291	1.89331	high
4170	7468200	4315232	3749986	1042672	2707314	147	57.7814	50.2127	13.9615	1.92259	low
3659	4850404	3885104	3388122	662091	2726031	146	80.0986	69.8524	13.6502	1.92271	low
3544	4100700	3835652	3289226	563064	2726162	146	93.5365	80.2113	13.7309	1.9228	high
3458	7008592	4393227	3786944	1067787	2719157	147	62.6834	54.0329	15.2354	1.931	low
4132	6343295	4059494	3518142	779766	2738376	146	63.9966	55.4624	12.2928	1.93141	low
3818	4167487	3907662	3342660	616133	2726527	147	93.7654	80.208	14.7843	1.93623	high
4111	4382006	4124557	3546840	781149	2765691	146	94.1249	80.941	17.8263	1.95068	high
4079	6212824	4156303	3605500	824901	2780599	147	66.8988	58.0332	13.2774	1.97463	low
3990	6499822	4316212	3726194	911829	2814365	147	66.4051	57.3276	14.0285	1.99861	low
3621	6097555	4022164	3503184	683949	2819235	147	65.9636	57.4523	11.2168	2.00207	low
3652	5901791	4228577	3646904	793615	2853289	146	71.649	61.7932	13.447	2.01246	low
4158	4804676	4298465	3688880	809655	2879225	146	89.4642	76.7769	16.8514	2.03076	high
3719	7792022	4282382	3722964	862659	2860305	147	54.9585	47.7792	11.0711	2.03123	low
4058	6333535	4542200	3990562	1022151	2968411	146	71.7167	63.0069	16.1387	2.09366	low
3597	4643197	4358185	3741026	724481	3016545	146	93.8617	80.57	15.6031	2.12761	high
4114	5307637	4717080	4034528	996137	3038391	146	88.8734	76.0136	18.768	2.14302	high
3833	8724217	4380735	3810436	786283	3024153	147	50.2135	43.6765	9.01265	2.14759	low
3517	4979987	4520431	3868378	797840	3070538	146	90.7719	77.6785	16.0209	2.16569	high
4169	6700932	4550645	3954578	858068	3096510	147	67.9106	59.0153	12.8052	2.19897	low
3706	6396352	4616326	4012858	912894	3099964	147	72.1712	62.7367	14.2721	2.20142	low
3671	6960477	4536132	3935540	817104	3118436	147	65.1698	56.5412	11.7392	2.21454	low
3960	5066345	4720622	4036204	893386	3142818	146	93.1761	79.667	17.6337	2.21667	high
3763	5045629	4728974	4014768	864287	3150481	146	93.7242	79.5692	17.1294	2.22208	high
3666	7981803	5018410	4363202	1211628	3151574	147	62.8731	54.6644	15.1799	2.23807	low
4177	4943861	4664357	4011520	811204	3200316	145	94.3464	81.1414	16.4083	2.24177	high
3804	6948902	4885586	4253068	1081285	3171783	147	70.3073	61.2049	15.5605	2.25243	low
3788	5433410	4696758	3998590	800308	3198282	146	86.4422	73.5926	14.7294	2.25579	high
4190	4997054	4727491	4081210	882626	3198584	146	94.6056	81.6723	17.6629	2.25601	high
3809	5135224	4823377	4107284	894585	3212699	146	93.9273	79.9826	17.4206	2.26596	high
3698	5173019	4848686	4137842	851192	3286650	146	93.7303	79.9889	16.4545	2.31812	high
3736	5103203	4785970	4098076	827734	3270342	147	93.7836	80.304	16.2199	2.32242	high
4027	5457718	5066410	4320638	1018490	3302148	146	92.8302	79.1657	18.6615	2.32905	high
3822	5293451	4963106	4225634	921634	3304000	146	93.7594	79.8276	17.4108	2.33036	high
4023	5414706	4983829	4257406	953056	3304350	146	92.0425	78.6267	17.6013	2.3306	high
3675	5576163	5195178	4389392	1104033	3285359	147	93.1676	78.7171	19.7992	2.33308	high
3786	5227340	4902375	4189440	879109	3310331	146	93.7834	80.1448	16.8175	2.33482	high
3642	5692287	4803815	4179870	891916	3287954	147	84.3917	73.4304	15.6689	2.33492	low
3637	6452675	4810905	4161044	839323	3321721	146	74.5568	64.4856	13.0074	2.34286	low
4135	6373078	4850840	4225250	913583	3311667	147	76.1146	66.2984	14.335	2.35176	low
3947	5343683	5031414	4290030	977549	3312481	147	94.1563	80.2823	18.2935	2.35234	high
3846	6195071	4746754	4150652	814028	3336624	146	76.6215	66.9993	13.1399	2.35337	low
3927	5854186	4887894	4246404	922352	3324052	147	83.494	72.5362	15.7554	2.36056	low
3815	5261931	4934053	4195476	861955	3333521	147	93.7689	79.7326	16.381	2.36728	high
4060	5412326	5083573	4353930	978629	3375301	146	93.9258	80.4447	18.0815	2.38065	high
3775	5615333	5028541	4283428	906838	3376590	146	89.5502	76.2809	16.1493	2.38156	high
3490	5649840	5149311	4467774	1051623	3416151	146	91.1408	79.0779	18.6133	2.40946	low
3679	5541249	5169330	4414734	987781	3426953	146	93.2882	79.6704	17.826	2.41708	high
4045	5678159	5347983	4559252	1125533	3433719	146	94.1852	80.2945	19.8221	2.42185	high
4009	5550307	5185069	4448172	1011547	3436625	146	93.4195	80.1428	18.2251	2.4239	high
4128	6130589	5146743	4459408	966291	3493117	147	83.9519	72.7403	15.7618	2.48062	low
4124	6065192	5130319	4454476	955980	3498496	147	84.5863	73.4433	15.7617	2.48444	low
3772	5790085	5361154	4538988	999727	3539261	146	92.592	78.3924	17.2662	2.49629	high
3811	5598720	5210818	4430788	908432	3522356	147	93.0716	79.1393	16.2257	2.50138	high
3955	6003912	5471680	4682958	1131650	3551308	146	91.1352	77.9984	18.8485	2.50479	high
3938	7906111	5319914	4625790	1095776	3530014	147	67.2886	58.509	13.8599	2.50682	low
3676	5705827	5365917	4579702	1016265	3563437	146	94.0428	80.2636	17.811	2.51334	high
4041	5728015	5380775	4583866	1035035	3548831	147	93.9379	80.0254	18.0697	2.52018	high
4136	8209361	5501005	4819042	1248913	3570129	147	67.0089	58.7018	15.2133	2.53531	low
3839	8220562	5273992	4590742	1019623	3571119	147	64.1561	55.8446	12.4033	2.53601	low
3853	6450940	5213181	4538470	937102	3601368	146	80.8127	70.3536	14.5266	2.5401	low
3876	6733132	5892273	5045590	1399184	3646406	146	87.5116	74.9367	20.7806	2.57186	high
3942	6542781	6077154	5149286	1448002	3701284	147	92.8833	78.7018	22.1313	2.62845	high
4147	6153243	5747836	4936490	1204212	3732278	146	93.4115	80.2258	19.5704	2.63243	low
3678	6080924	5701027	4860160	1101300	3758860	146	93.7526	79.9247	18.1107	2.65118	high
4184	6158244	5802771	4960608	1179055	3781553	146	94.2277	80.5523	19.146	2.66718	high
3850	6661122	5476037	4783820	1022965	3760855	147	82.2089	71.817	15.3572	2.67075	low
3871	6090546	5708339	4877504	1067352	3810152	147	93.7246	80.0832	17.5247	2.70576	high
3541	6085782	5683942	4873676	1053718	3819958	147	93.3971	80.083	17.3144	2.71272	high
4100	7167284	5597326	4901872	1059692	3842180	147	78.0955	68.3923	14.7851	2.7285	low
3710	6130560	5745756	4904646	1047029	3857617	147	93.7232	80.0032	17.0788	2.73947	high
3563	7077527	5838338	5091858	1141180	3950678	147	82.4912	71.944	16.124	2.80555	low
3575	6366470	5982597	5137024	1109465	4027559	146	93.9704	80.6887	17.4267	2.84069	high
3825	6636069	6205853	5281320	1237841	4043479	147	93.517	79.5851	18.6532	2.87146	high
3847	6533542	6052389	5302916	1209145	4093771	146	92.6356	81.1645	18.5067	2.88739	low
3643	7175163	6374168	5512190	1418103	4094087	146	88.8366	76.8232	19.7641	2.88762	low
4144	9393189	6325549	5545976	1474384	4071592	147	67.3419	59.0425	15.6963	2.89142	low
3875	12292317	6922733	5970354	1870391	4099963	147	56.3176	48.5698	15.2159	2.91157	low
3817	6632980	6225030	5346874	1196854	4150020	146	93.8497	80.6104	18.044	2.92707	high
3823	6757095	6250357	5360188	1155844	4204344	146	92.5007	79.3268	17.1056	2.96538	high
3549	11027708	7435339	6470588	2258055	4212533	147	67.4242	58.6757	20.4762	2.99151	low
4078	6985941	6526794	5624666	1390626	4234040	147	93.4276	80.5141	19.9061	3.00678	high
3602	6808113	6408595	5492244	1169504	4322740	146	94.1317	80.672	17.1781	3.04889	high
3536	6952069	6557753	5651460	1292930	4358530	146	94.3281	81.2918	18.5978	3.07413	high
3928	6863505	6403782	5575308	1207439	4367869	146	93.3019	81.2312	17.5922	3.08072	low
3605	7424593	6557523	5703548	1269174	4434374	146	88.3216	76.8197	17.0942	3.12763	low
4141	7580679	6764302	5912734	1309082	4603652	147	89.2308	77.9974	17.2687	3.26926	low
3526	8072169	7472760	6303296	1583407	4719889	146	92.5744	78.0868	19.6156	3.329	high
3776	8238966	7394937	6250556	1548669	4701887	147	89.7556	75.8658	18.7969	3.33902	high
3829	9433167	7653143	6632912	1923738	4709174	147	81.1302	70.3148	20.3933	3.3442	low
3672	9618385	8187817	7106804	2067299	5039505	147	85.1267	73.8877	21.4932	3.57878	low
3508	8667479	8081516	6842450	1756810	5085640	146	93.2395	78.9439	20.269	3.58697	high
3571	8687415	8111562	6874302	1761057	5113245	147	93.3714	79.1294	20.2714	3.63115	high
4098	10297036	8917319	7762262	1980034	5782228	147	86.6008	75.3835	19.2292	4.10622	low
4099	10792531	9067100	7944252	1850193	6094059	146	84.0127	73.6088	17.1433	4.29823	low
4118	13553293	12700361	10854138	3009923	7844215	146	93.7068	80.0849	22.2081	5.53263	high

## Sheet: S2
Supplementary data S2: BSA -QTL candidate gene set with at least one significant SNP within 5 significant QTL regions identified by QTL seqr
gene	number_of-SNPs	qtl	gene_start	gene_end	deltaSNP_max	deltaSNP_mean	deltaSNP_abs_max	deltaSNP_abs_mean	G_max	G_mean	Gprime_max	Gprime_mean	translation	Arabidopsis_thaliana	single_Arabidopsis_thaliana	FST_intersection	GO_term_IDs	OrthoFinder_OL_Arabidopsis_thaliana	OrthoFinder_N0_HOG	OrthoFinder_N0_Arabidopsis_thaliana	OrthoFinder_OG_Orthogroup	OrthoFinder_OG_Arabidopsis_thaliana	RBH_B_id	RBH_A_length	RBH_B_length	RBH_A_qcovhsp	RBH_B_qcovhsp	RBH_length	RBH_pident	RBH_bitscore	BLAST_saccver	BLAST_pident	BLAST_length	BLAST_mismatch	BLAST_gapopen	BLAST_qstart	BLAST_qend	BLAST_sstart	BLAST_send	BLAST_evalue	BLAST_bitscore	BLAST_qcovhsp	BLAST_qlen	BLAST_slen	TAIR_symbol	TAIR_full_name	TAIR_subcellular.prediction	TAIR_gene_model_type	TAIR_short_description
LOC9316415	59	2	113949	116475	0.234736842105263	0.0349377403451809	0.234736842105263	0.0891669124073149	33.0168101274696	5.44843216304083	3.49979371946671	3.4989041417586	XP_020883237.1	AT2G20980.1	AT2G20980.1	1	GO:0003690; GO:0003697; GO:0005634; GO:0006270; GO:0046872; GO:0003688; GO:0043596; GO:0006260	AT2G20980.1	N0.HOG0022744	AT2G20980.1	OG0016753	AT2G20980.1	AT2G20980.1	392	397	100	99	396	93.687	734	AT2G20980.1	93.687	396	21	1	1	392	1	396	0	740	100	392	397	MCM10	minichromosome maintenance 10	Nucleus	protein_coding	minichromosome maintenance 10
LOC9314600	82	2	136777	139363	0.153132992327366	-0.0271446308669158	0.271499543170397	0.0900100672401152	27.9138447679399	5.97717927708991	3.480608672321	3.4795665355091	XP_020883422.1	AT2G21070.3	AT2G21070.3	1	GO:0005634; GO:0007623; GO:0008168; GO:0009648; GO:0032259; GO:0048573;GO:0008168; GO:0052907; GO:0070475	AT2G21070.3	N0.HOG0016051	AT2G21070.3	OG0010319	AT2G21070.3	AT2G21070.3	477	514	100	94	485	89.485	880	AT2G21070.3	89.485	485	41	3	1	477	1	483	0	880	100	477	514	FIO1	FIONA1	Cytoplasm	protein_coding	methyltransferases
LOC9316435	20	2	215036	215939	0.183026928430855	-0.0171937444430935	0.183026928430855	0.0825511417121282	14.4371119281054	3.91216843566048	3.4145823428575	3.41413359770294	XP_020885004.1	AT2G21237.1	AT2G21237.1	1	GO:0016020	AT2G21237.1	N0.HOG0006868	AT4G38905.1, AT2G21237.1	OG0002641	AT2G21237.1, AT4G38905.1	AT2G21237.1	167	167	98	99	166	89.759	285	AT2G21237.1	89.759	166	14	1	5	167	1	166	2.85e-100	285	98	167	167			Mitochondrion	protein_coding	NULL
LOC9307197	43	3	1731803	1734831	0.115981579396214	-0.0805681307529881	0.295510204081633	0.101090093481671	28.3739024830622	6.45226384895362	3.254265557121	3.25295665357156	XP_002873178.1	AT5G04970.1	AT5G04970.1	1	GO:0004857; GO:0005576; GO:0030599; GO:0042545; GO:0045490	AT5G04970.1	N0.HOG0018616	AT5G04970.1	OG0012709	AT5G04970.1	AT5G04970.1	616	625	99	99	623	94.061	1205	AT5G04970.1	94.061	623	27	1	4	616	2	624	0	1205	99	616	625	PMEI-PME47	NULL	Chloroplast	protein_coding	Plant invertase/pectin methylesterase inhibitor superfamily
LOC9309310	92	3	2278831	2282626	0.130733556751633	-0.0501075893557626	0.308424908424908	0.0794128763169939	21.093802165434	3.80791207277072	3.35782669738059	3.35694556133934	XP_020875966.1	AT5G06160.1	AT5G06160.1	1	GO:0000398; GO:0003723; GO:0005681; GO:0008270; GO:0045694; GO:0003676; GO:0005634	AT5G06160.1	N0.HOG0008763	AT5G06160.1	OG0003824	AT5G06160.1	AT5G06160.1	508	505	100	99	508	96.063	999	AT5G06160.1	96.063	508	16	1	1	508	1	504	0	999	100	508	505	ATO	ATROPOS	Nucleus	protein_coding	splicing factor-related
LOC9307845	17	4	7272198	7275304	0.310077519379845	0.0224025403223661	0.430555555555556	0.114000281755432	17.0412205237928	5.21152026935797	3.22387784428974	3.22339434746259	XP_020876663.1	AT5G17620.1	AT5G17620.1	1	GO:0005876; GO:0009524; GO:0051011; GO:0051301; GO:0031023; GO:0051225; GO:0070652	AT5G17620.1	N0.HOG0016222	AT5G17620.1	OG0010464	AT5G17620.1	AT5G17620.1	329	330	100	99	329	99.088	668	AT5G17620.1	99.088	329	3	0	1	329	1	329	0	668	100	329	330	AUG7	augmin subunit 7	Unknown	protein_coding	NULL
LOC9302859	30	5	24395	28343	0.0709090909090909	-0.0368717466365111	0.19774011299435	0.0564183786114036	21.0465420873247	3.07787893059688	3.42901770531351	3.42826943517404	XP_002868836.1	AT4G38190.1	AT4G38190.1	1	GO:0000139; GO:0005794; GO:0009846; GO:0016760; GO:0030244; GO:0071555; GO:0016020	AT4G38190.1	N0.HOG0020037	AT4G38190.1	OG0014083	AT4G38190.1	AT4G38190.1	1111	1112	100	99	1111	98.92	2288	AT4G38190.1	98.92	1111	12	0	1	1111	1	1111	0	2288	100	1111	1112	ATCSLD4, CSLD4	ARABIDOPSIS THALIANA CELLULOSE SYNTHASE-LIKE D4, cellulose synthase like D4	Golgi_body	protein_coding	cellulose synthase like D4
LOC9304909	40	5	32021	39631	0.25	0.0136201265428226	0.25	0.0599194319888645	19.2623105182674	3.20151596406753	3.4258396450281	3.42442738953023	XP_020872201.1	AT4G38200.1	AT4G38200.1	1	GO:0005085; GO:0005829; GO:0009507; GO:0015031; GO:0016020; GO:0032012; GO:0005802	AT4G38200.1	N0.HOG0023984	AT4G38200.1	OG0017961	AT4G38200.1	AT4G38200.1	1683	1688	100	99	1690	96.982	3369	AT4G38200.1	96.982	1690	41	3	1	1683	1	1687	0	3369	100	1683	1688	BIG1	BIG1	Nucleus	protein_coding	SEC7-like guanine nucleotide exchange family protein
LOC9304911	25	5	48464	50345	0.0818286320629587	0.00957718426878957	0.0818286320629587	0.0335819908157892	3.74917853353709	0.938057924611108	3.41896908873641	3.4186023862607	XP_020872526.1	AT4G38220.2	AT4G38220.2	1	GO:0000325; GO:0004046; GO:0005783; GO:0005794; GO:0005886; GO:0006520; GO:0010043; GO:0046872; GO:0099503;GO:0004046; GO:0005737; GO:0016787	AT4G38220.2	N0.HOG0006931	AT4G38220.2	OG0002677	AT4G38220.2	AT4G38220.2	436	434	100	99	436	94.954	846	AT4G38220.2	94.954	436	19	1	1	436	1	433	0	846	100	436	434	AQI	aquaporin interactor	Cytoplasm	protein_coding	Peptidase M20/M25/M40 family protein
LOC9304914	62	5	61511	64818	0.130710825249043	-0.00306332736976647	0.146193429212297	0.041193237809027	15.152178327683	1.49381816649223	3.41351490092299	3.41301324797073	XP_002866790.1	AT4G38270.1	AT4G38270.1	1	GO:0000139; GO:0000325; GO:0005768; GO:0005794; GO:0005797; GO:0005802; GO:0045489; GO:0047262; GO:0071555; GO:0016757	AT4G38270.1	N0.HOG0022592	AT4G38270.1	OG0016602	AT4G38270.1	AT4G38270.1	680	681	100	99	680	95.588	1369	AT4G38270.1	95.588	680	30	0	1	680	1	680	0	1369	100	680	681	GAUT3	galacturonosyltransferase 3	Extracellular	protein_coding	galacturonosyltransferase 3
LOC9302869	47	5	96498	100251	0.14651336945509	0.00149953080490541	0.14651336945509	0.0462980644827969	14.8114384989918	2.16567371334474	3.39889189853238	3.39813487737079	XP_020872870.1	AT4G38420.1	AT4G38420.1	1	GO:0005507; GO:0009505; GO:0009506; GO:0016491	AT4G38420.1	N0.HOG0008243	AT4G38420.1, AT4G28090.1	OG0003484	AT4G28090.1, AT4G38420.1	AT4G38420.1	554	550	96	96	531	95.669	1052	AT4G38420.1	95.669	531	22	1	19	549	18	547	0	1052	96	554	550	sks9	SKU5 similar 9	Extracellular	protein_coding	SKU5 similar 9
LOC9302870	29	5	101399	103832	0.149579106410533	0.0223490642365232	0.149579106410533	0.0574192803884254	6.34346977971417	1.86767106367438	3.3968533634761	3.39640415373528	XP_020874960.1	AT4G38430.1	AT4G38430.1	1	GO:0005085; GO:0005829; GO:0005886; GO:0009860; GO:0016324; GO:0080092; GO:2000012; GO:2001108	AT4G38430.1	N0.HOG0015931	AT4G38430.1	OG0010201	AT4G38430.1	AT4G38430.1	608	549	89	99	549	95.082	1066	AT4G38430.1	95.082	549	21	2	65	608	1	548	0	1066	89	608	549	ATROPGEF1, ROPGEF1	ROP (rho of plants) guanine nucleotide exchange factor 1	Nucleus	protein_coding	rho guanyl-nucleotide exchange factor 1
LOC9302889	27	5	237034	238979	0.193728479256511	0.0340291247541566	0.197887542715129	0.0754102436871585	22.0655529622435	4.46976231934559	3.34023536975403	3.33985721372208	XP_002868864.1	AT4G38800.1	AT4G38800.1	1	GO:0005829; GO:0005886; GO:0008930; GO:0009116; GO:0010087; GO:0019509; GO:0003824	AT4G38800.1	N0.HOG0020045	AT4G38800.1	OG0014091	AT4G38800.1	AT4G38800.1	266	268	100	99	267	96.255	513	AT4G38800.1	96.255	267	9	1	1	266	1	267	0	513	100	266	268	ATMTAN1, ATMTN1, MTAN1, MTN1	ARABIDOPSIS METHYLTHIOADENOSINE NUCLEOSIDASE 1, ARABIDOPSIS METHYLTHIOADENOSINE NUCLEOSIDASE 1, METHYLTHIOADENOSINE NUCLEOSIDASE 1, methylthioadenosine nucleosidase 1	Cytoplasm	protein_coding	methylthioadenosine nucleosidase 1
LOC9302898	32	5	298584	300103	0.132815838199687	-0.0131832339970778	0.156231222208869	0.0593672865602266	14.5871653587731	3.3263236043307	3.31450314467348	3.31418883833194	XP_020872718.1	AT4G38940.1	AT4G38940.1	1	GO:0005634; GO:0016567; GO:0005515	AT4G38940.1	N0.HOG0000703	AT4G38940.1	OG0000076	AT4G38940.1	AT4G38940.1	368	371	99	98	365	90.411	682	AT4G38940.1	90.411	365	34	1	5	368	6	370	0	682	99	368	371			Nucleus	protein_coding	Galactose oxidase/kelch repeat superfamily protein
LOC9304956	47	5	414656	416795	0.234265734265734	0.00424447972105494	0.234265734265734	0.0616646650050776	16.2322065468891	2.60739626448781	3.24650920366741	3.24546939816647	XP_020872667.1	AT4G39100.1	AT4G39100.1	1	GO:0000976; GO:0003682; GO:0003700; GO:0005634; GO:0009791; GO:0009908; GO:0010228; GO:0035064; GO:0045814; GO:0046872; GO:2000028;GO:0003682	AT4G39100.1	N0.HOG0020050	AT4G39100.1	OG0014096	AT4G39100.1	AT4G39100.1	228	229	100	99	228	96.93	468	AT4G39100.1	96.93	228	7	0	1	228	1	228	9.71e-171	468	100	228	229	SHL	SHORT LIFE	Nucleus	protein_coding	PHD finger family protein / bromo-adjacent homology (BAH) domain-containing protein
LOC9330085	48	1	23266540	23267966	0.200461133069829	0.0224394252561432	0.200461133069829	0.071849074898332	8.72239520178843	1.82532155197986	3.22572928484309	3.22507902521892	XP_002894024.2	AT1G55928.1	AT1G55928.1	0	GO:0000381	AT1G55928.1	N0.HOG0008293	AT2G27285.1, AT1G55928.1, AT2G27280.1	OG0003521	AT1G55928.1, AT2G27280.1, AT2G27285.1		NA	NA	NA	NA	NA	NA	NA	AT1G55928.1	68.67	233	59	7	2	227	9	234	7.12e-95	279	98	230	299			Nucleus	protein_coding	Coiled-coil domain-containing protein 55 (DUF2040)
LOC110224440	60	1	23268291	23270136	0.289473684210526	0.0295022527718696	0.289473684210526	0.0946764519104999	3.95815353545244	0.740243375169605	3.22819474068793	3.22687423727284	XP_020866161.1	AT5G43755.1	AT5G43755.1	0	GO:0003676; GO:0003964; GO:0004523	AT5G43755.1	N0.HOG0001042	AT3G32130.1, AT3G25270.1, AT2G04420.1, AT1G50160.1, AT5G43755.1, AT1G04625.1, AT2G46460.1, AT1G47497.1, AT2G11205.1, AT1G27870.1, AT1G77815.1	OG0000130	AT1G04625.1, AT1G27870.1, AT1G47497.1, AT1G50160.1, AT1G52990.1, AT1G77815.1, AT2G02650.1, AT2G04420.1, AT2G11205.1, AT2G13980.1, AT2G46460.1, AT3G09510.1, AT3G23320.1, AT3G25270.1, AT3G32130.1, AT4G03292.1, AT4G09775.1, AT5G26617.1, AT5G43755.1, AT5G44470.1, AT5G52115.1, AT5G65005.1		NA	NA	NA	NA	NA	NA	NA	AT3G25270.1	41.159	345	194	5	73	411	2	343	2.55e-90	276	82	415	344			Nucleus	protein_coding	NULL
LOC9330086	28	1	23280628	23282964	0.4	-0.0188152734533252	0.458333333333333	0.158227057033194	13.3621984949425	3.31879630550187	3.24316167188352	3.24161518355692	NA	NA	NA	0	NA	NA	NA	NA	NA	NA	NA	NA	NA	NA	NA	NA	NA	NA	NA	NA	NA	NA	NA	NA	NA	NA	NA	NA	NA	NA	NA	NA	NA	NA	NA	NA	NA
LOC9327386	74	1	23286414	23291771	0.253136933987998	-0.0508056480741443	0.29698012830543	0.110836811751418	19.9329541133436	3.16951277857741	3.2463504556144	3.24544715804488	XP_020868874.1	AT1G53780.2	AT1G53780.2	0	GO:0000413; GO:0000502; GO:0003755; GO:0005524; GO:0005737; GO:0016887;GO:0005524; GO:0005634; GO:0008540; GO:0036402; GO:0043161; GO:0016887; GO:0003723; GO:0003676						AT1G53780.2	740	621	90	99	666	72.372	933	AT1G53780.2	72.372	666	133	6	77	740	4	620	0	933	90	740	621			Chloroplast	protein_coding	peptidyl-prolyl cis-trans isomerases;hydrolases;nucleoside-triphosphatases;ATP binding;nucleotide binding;ATPases
LOC9327387	40	1	23292125	23293897	0.102039405461459	-0.00250055732192713	0.205892088712347	0.0573125062120749	16.1207025548921	1.81665505909921	3.24456885437991	3.24430852584753	XP_020868876.1	AT1G53790.2	AT1G53790.2	0	GO:0005515	AT1G53790.2	N0.HOG0014204	AT1G53790.2	OG0008580	AT1G53790.2	AT1G53790.2	378	462	97	79	367	78.474	585	AT1G53790.2	78.474	367	74	3	13	378	82	444	0	585	97	378	462			Nucleus	protein_coding	F-box and associated interaction domains-containing protein
LOC9330087	36	1	23304032	23305896	0.213852813852814	-0.00928435882445956	0.213852813852814	0.0723744554214059	20.1274800269197	2.99434945995579	3.24086414614457	3.24057308270519	XP_020868940.1	AT1G45688.1	AT1G45688.1	0	GO:0005802; GO:0005886; GO:0008017;GO:0016020	AT1G45688.1	N0.HOG0012796	AT1G45688.1	OG0007279	AT1G45688.1	AT1G45688.1	342	343	100	99	342	97.953	685	AT1G45688.1	97.953	342	7	0	1	342	1	342	0	685	100	342	343	CC1	companion of cellulose synthase 1	Unknown	protein_coding	NULL
LOC110225396	13	1	23345127	23360443	0.288461538461538	0.0140208131491849	0.361419068736142	0.171789447105557	13.4801552661961	4.92145851351674	3.22378745467579	3.22359737373448	XP_020870704.1	AT1G50200.2	AT1G50200.2	0	GO:0000049; GO:0004813; GO:0005524; GO:0005634; GO:0005739; GO:0008270; GO:0009507; GO:0070143; GO:0003676; GO:0006419; GO:0000166; GO:0005737; GO:0002161							NA	NA	NA	NA	NA	NA	NA	AT1G50200.2	44.565	184	41	5	1	124	220	402	7.81e-39	137	100	124	1012	ACD, ALATS	Alanyl-tRNA synthetase	Chloroplast	protein_coding	Alanyl-tRNA synthetase
LOC110225395	13	1	23347534	23360244	0.288461538461538	0.0140208131491849	0.361419068736142	0.171789447105557	13.4801552661961	4.92145851351674	3.22378745467579	3.22359737373448	XP_020870702.1	AT1G21990.1	AT1G21990.1	0	GO:0005515	AT1G21990.1	N0.HOG0000583	AT4G27050.1, AT1G21990.1, AT2G29930.1, AT2G29910.6, AT1G64540.1, AT5G35995.1	OG0000061	AT1G21990.1, AT1G47920.1, AT1G48390.1, AT1G48400.1, AT1G64540.1, AT2G29910.6, AT2G29930.1, AT4G27050.1, AT5G12450.1, AT5G35995.1	AT1G21990.1	466	466	100	99	468	82.692	779	AT1G21990.1	83.12	468	74	3	1	466	1	465	0	779	100	466	466			Unknown	protein_coding	F-box/RNI-like/FBD-like domains-containing protein
LOC9330089	10	1	23363373	23365465	0.190793458509994	0.0282999242334155	0.194352941176471	0.113932304866599	16.2004991018185	4.39957324745819	3.22232657906591	3.22194139662967	XP_002894028.2	AT1G22015.1	AT1G22015.1	0	GO:0000139; GO:0006486; GO:0008378; GO:0016020; GO:0016758; GO:0016757; GO:0048531	AT1G22015.1	N0.HOG0015842	AT1G22015.1	OG0010116	AT1G22015.1		NA	NA	NA	NA	NA	NA	NA	AT1G22015.1	92.083	240	18	1	1	239	1	240	2.74e-154	434	98	243	399	DD46, GALT8	NULL	Golgi_body	protein_coding	Galactosyltransferase family protein
LOC9318218	20	2	26831	36669	0.153748782862707	0.00675329237514612	0.153748782862707	0.0565044914579715	7.42922614373436	1.39673634930886	3.57198444133264	3.56977100596323	XP_020884971.1	NA	NA	0	NA	NA	NA	NA	NA	NA	NA	NA	NA	NA	NA	NA	NA	NA	NA	NA	NA	NA	NA	NA	NA	NA	NA	NA	NA	NA	NA	NA	NA	NA	NA	NA	NA
LOC9316417	7	2	92388	94020	0.164252252252252	0.00326348904555249	0.164252252252252	0.0873120752176822	11.7323311338504	3.98492502453362	3.51806414830361	3.51763624964832	XP_002878525.1	AT2G20920.1	AT2G20920.1	0	GO:0016020; GO:0031969	AT2G20920.1	N0.HOG0017955	AT2G20920.1	OG0012087	AT2G20920.1	AT2G20920.1	287	288	100	99	287	97.213	565	AT2G20920.1	97.213	287	8	0	1	287	1	287	0	565	100	287	288			Chloroplast	protein_coding	Protein of unknown function (DUF3353)
LOC9314594	1	2	94094	94550	0.0990661566156616	0.0990661566156616	0.0990661566156616	0.0990661566156616	7.66173000433707	7.66173000433707	3.51654625315825	3.51654625315825	XP_002880350.2	AT2G20921.1	AT2G20921.1	0		AT2G20921.1	N0.HOG0030954	AT2G20921.1	OG0024551	AT2G20921.1	AT2G20921.1	75	68	100	99	75	70.667	102	AT2G20921.1	70.667	75	14	3	1	75	1	67	5.9e-31	102	100	75	68			Mitochondrion	protein_coding	NULL
LOC9316418	11	2	94662	95845	0.149662575813662	-0.0184405407841969	0.149662575813662	0.0825341366700902	8.44436011222114	3.14200173953703	3.51601806952235	3.51547899392067	XP_002880351.1	AT2G20930.1	AT2G20930.1	0	GO:0005737; GO:0006888	AT2G20930.1			OG0003906	AT2G20930.1	AT2G20930.1	140	141	100	99	140	99.286	286	AT2G20930.1	99.286	140	1	0	1	140	1	140	8.57e-102	286	100	140	141	tTRAPPC2(L)	NULL	Golgi_body	protein_coding	SNARE-like superfamily protein
LOC9316419	16	2	96082	96753	0.0736965542125203	-0.00960160074234686	0.0736965542125203	0.0382284673069493	5.09363133523997	1.7756956009597	3.51495663978757	3.51469676668875	XP_002880352.1	AT2G20940.1	AT2G20940.1	0	GO:0005739; GO:0016020	AT2G20940.1	N0.HOG0017956	AT2G20940.1	OG0012088	AT2G20940.1	AT2G20940.1	129	130	100	99	129	96.124	254	AT2G20940.1	96.124	129	5	0	1	129	1	129	3.43e-89	254	100	129	130			Unknown	protein_coding	Protein of unknown function (DUF1279)
LOC9316420	53	2	97033	99440	0.165180731218467	-0.0172153230904766	0.175438596491228	0.0586502776986453	13.4932798628236	2.08684801768665	3.51413989576272	3.51309814277079	XP_020882775.1	AT2G20950.7	AT2G20950.7	0		AT2G20950.7	N0.HOG0024055	AT2G20950.7	OG0018028	AT2G20950.7	AT2G20950.7	522	548	100	99	550	88.182	889	AT2G20950.7	88.182	550	34	4	1	522	1	547	0	911	100	522	548			Cytoplasm	protein_coding	NULL
LOC9314595	53	2	109056	112195	0.237378015722418	0.0535413060309251	0.237378015722418	0.103085570333248	32.4832648266856	9.15428685416599	3.5038630959459	3.50272856297235	XP_020883233.1	AT2G20960.1	AT2G20960.1	0		AT2G20960.1	N0.HOG0022743	AT2G20960.1	OG0016752	AT2G20960.1	AT2G20960.1	753	749	100	99	754	92.44	1400	AT2G20960.1	92.44	754	50	2	1	753	1	748	0	1400	100	753	749	pEARLI4	NULL	Nucleus	protein_coding	Arabidopsis phospholipase-like protein (PEARLI 4) family
LOC9314596	26	2	112284	113725	0.207972000777756	0.0355104301151599	0.207972000777756	0.0861227095085782	13.8966188318309	4.63242518332781	3.50127027116453	3.50075571723661	XP_002878528.1	AT2G20970.2	AT2G20970.2	0	GO:0016020	AT2G20970.2	N0.HOG0025561	AT2G20970.2	OG0019457	AT2G20970.2	AT2G20970.2	352	349	99	99	349	83.954	549	AT2G20970.2	83.954	349	54	1	3	351	1	347	0	549	99	352	349			Mitochondrion	protein_coding	NULL
LOC9316421	37	2	117415	120760	0.279205138498595	-0.00393066607872358	0.279205138498595	0.0800135704008186	23.3360979794604	4.27512160591213	3.49695705271925	3.49579699617222	XP_020884337.1	AT2G21010.1, AT2G21040.1	AT2G21010.1	0	GO:0008289; GO:0005783	AT2G21010.1, AT2G21040.1	N0.HOG0016050	AT2G21010.1, AT2G21040.1, AT2G20990.3	OG0010318	AT2G20990.3, AT2G21010.1, AT2G21040.1	AT2G20990.3	533	580	100	99	579	89.119	1030	AT2G20990.3	89.119	579	17	3	1	533	1	579	0	1030	100	533	580			Unknown	protein_coding	Calcium-dependent lipid-binding (CaLB domain) family protein
LOC9314597	12	2	121195	122207	0.099799639858987	0.022750583142731	0.120324578671916	0.0470585640912946	14.933970260806	3.70015632510381	3.49370188903343	3.4935529682479	XP_002878530.1	AT2G21045.1	AT2G21045.1	0	GO:0005634; GO:0005737; GO:0005739; GO:0008794; GO:0030611; GO:0046685; GO:0071722; GO:0003824	AT2G21045.1	N0.HOG0022745	AT2G21045.1	OG0016754	AT2G21045.1	AT2G21045.1	140	170	100	82	140	93.571	279	AT2G21045.1	93.571	140	9	0	1	140	30	169	3.09e-98	279	100	140	170	ARQ1, HAC1	ARSENATE REDUCTASE QTL1, High arsenic content 1	Cytoplasm	protein_coding	Rhodanese/Cell cycle control phosphatase superfamily protein
LOC9314598	26	2	130375	132758	0.185714285714286	-0.0192396260281082	0.185714285714286	0.05955742324452	16.5513290018738	3.40484997918554	3.48576141587447	3.4847287383332	XP_002878531.1	AT2G21050.1	AT2G21050.1	0	GO:0005886; GO:0006865; GO:0009624; GO:0009734; GO:0010588; GO:0015293; GO:0048829	AT2G21050.1	N0.HOG0014176	AT2G21050.1	OG0008552	AT2G21050.1	AT2G21050.1	483	484	100	99	483	98.965	988	AT2G21050.1	98.965	483	5	0	1	483	1	483	0	988	100	483	484	LAX2	like AUXIN RESISTANT 2	Cell_membrane	protein_coding	like AUXIN RESISTANT 2
LOC9314599	20	2	132876	133869	0.153174358748735	-0.0180731144559866	0.223981513180418	0.102308870911479	15.8510560055962	4.62044133325913	3.48389589827225	3.48348782157017	XP_020884626.1	AT2G21060.1	AT2G21060.1	0	GO:0003677; GO:0003729; GO:0005634; GO:0005730; GO:0005829; GO:0008270; GO:0009409; GO:0009793; GO:0010154; GO:0003676	AT2G21060.1	N0.HOG0006642	AT2G21060.1, AT4G38680.1	OG0002508	AT2G21060.1, AT4G38680.1	AT2G21060.1	198	202	99	98	198	82.828	189	AT2G21060.1	84.343	198	29	1	3	198	4	201	3.24e-77	229	99	198	202	ATCSP4, ATGRP2B, GRP2B	COLD SHOCK DOMAIN PROTEIN 4, glycine-rich protein 2B, glycine-rich protein 2B	Unknown	protein_coding	glycine-rich protein 2B
LOC9314601	33	2	139403	141367	0.115734746722771	-0.00690044807682678	0.151471984805318	0.069111220139213	16.3702972326351	4.30924953488125	3.47837275117858	3.47762319984398	XP_020883423.1	AT2G21080.1	AT2G21080.1	0	GO:0005773; GO:0016020	AT2G21080.1	N0.HOG0026516	AT2G21080.1	OG0020322	AT2G21080.1	AT2G21080.1	414	415	100	99	414	95.894	796	AT2G21080.1	95.894	414	17	0	1	414	1	414	0	796	100	414	415			Mitochondrion	protein_coding	NULL
LOC9314602	33	2	141462	143612	0.191964285714286	-0.0152780231449599	0.191964285714286	0.0781665030073962	14.7270678915982	4.16866548424416	3.47663885761343	3.47576118505705	XP_002880355.1	AT2G21090.1	AT2G21090.1	0	GO:0003723; GO:0009451; GO:0005515	AT2G21090.1	N0.HOG0022816	AT2G21090.1	OG0016820	AT2G21090.1	AT2G21090.1	599	598	100	99	599	94.992	1187	AT2G21090.1	94.992	599	28	1	1	599	1	597	0	1187	100	599	598			Mitochondrion	protein_coding	Pentatricopeptide repeat (PPR-like) superfamily protein
LOC9316423	32	2	143690	144564	0.120657301695866	0.0053511675469845	0.177441077441077	0.0684667505544487	20.8938119341732	3.71908813052377	3.47471090296799	3.47431819295036	XP_002880356.2	AT2G21100.1	AT2G21100.1	0	GO:0009699; GO:0048046	AT2G21100.1	N0.HOG0017957	AT2G21100.1	OG0012089	AT2G21100.1	AT2G21100.1	189	188	99	99	187	95.722	379	AT2G21100.1	95.722	187	8	0	3	189	1	187	7.43e-137	379	99	189	188	DIR23	DIRIGENT PROTEIN 23	Unknown	protein_coding	Disease resistance-responsive (dirigent-like protein) family protein
LOC9316424	15	2	145581	146249	0.0641559643642254	-0.0154320229548784	0.0879354290569244	0.0442884613122892	3.36173228514634	1.41406941538371	3.47312128959731	3.47286248524068	XP_002880357.1	AT2G21110.1	AT2G21110.1	0	GO:0009699; GO:0048046	AT2G21110.1	N0.HOG0025195	AT2G21110.1	OG0019121	AT2G21110.1	AT2G21110.1	187	187	100	99	187	88.235	339	AT2G21110.1	88.235	187	21	1	1	187	1	186	5.43e-121	339	100	187	187	DIR4	DIRIGENT PROTEIN 4	Extracellular	protein_coding	Disease resistance-responsive (dirigent-like protein) family protein
LOC9316425	54	2	146751	149507	0.160729143030028	-0.000691187241780237	0.168999263390508	0.0690120171173038	18.1489724887654	3.86950392538485	3.4721914838996	3.47093907118702	XP_020885060.1	AT2G21120.1	AT2G21120.1	0	GO:0005769; GO:0005783; GO:0005886; GO:0015095; GO:0015693; GO:0051607; GO:0016020	AT2G21120.1	N0.HOG0017958	AT2G21120.1	OG0012090	AT2G21120.1	AT2G21120.1	328	329	100	99	328	99.085	661	AT2G21120.1	99.085	328	3	0	1	328	1	328	0	661	100	328	329	AVI2, ENOR3	ANTIVIRAL RNAI-DEFECTIVE 2, enhancer of rdr6 3	Chloroplast	protein_coding	Protein of unknown function (DUF803)
LOC9316426	21	2	156735	157723	0.198214285714286	0.0457614030916094	0.198214285714286	0.0742417310451042	12.5452507599533	2.79648538465039	3.46372029587326	3.46333486565728	XP_020885496.1	AT2G21130.1	AT2G21130.1	0	GO:0000413; GO:0003755; GO:0005739; GO:0005829; GO:0005886; GO:0006457; GO:0005737; GO:0016018	AT2G21130.1	N0.HOG0006933	AT2G21130.1, AT4G38740.1	OG0002678	AT2G21130.1, AT4G38740.1	AT2G21130.1	174	175	100	99	174	95.977	347	AT2G21130.1	95.977	174	7	0	1	174	1	174	1.02e-124	347	100	174	175			Cytoplasm	protein_coding	Cyclophilin-like peptidyl-prolyl cis-trans isomerase family protein
LOC110229493	5	2	158388	158865	0.324393358876118	0.0630457507975657	0.324393358876118	0.162544926086215	6.03500274306925	2.36714025626245	3.46238127441929	3.46223969420507	NA	NA	NA	0	NA	NA	NA	NA	NA	NA	NA	NA	NA	NA	NA	NA	NA	NA	NA	NA	NA	NA	NA	NA	NA	NA	NA	NA	NA	NA	NA	NA	NA	NA	NA	NA	NA
LOC9316427	25	2	159751	161256	0.149851489891731	0.0227401921595441	0.149851489891731	0.0676681138016035	12.6429368365091	3.19508860992769	3.46120593926783	3.46071589285292	XP_020885733.1	NA	NA	0	NA	NA	NA	NA	NA	NA	NA	NA	NA	NA	NA	NA	NA	NA	NA	NA	NA	NA	NA	NA	NA	NA	NA	NA	NA	NA	NA	NA	NA	NA	NA	NA	NA
LOC9316428	69	2	163342	166368	0.20247685675924	-0.00378946780646522	0.20247685675924	0.0637734317594069	19.7232198765315	2.97951601602895	3.45818955508514	3.45660316995172	XP_020883928.1	AT2G21150.1	AT2G21150.1	0	GO:0005634; GO:0009637; GO:0009873; GO:0010099; GO:0010114; GO:0035196; GO:0042752; GO:0048511; GO:0006325	AT2G21150.1	N0.HOG0019317	AT2G21150.1	OG0013387	AT2G21150.1	AT2G21150.1	337	338	100	99	337	99.11	684	AT2G21150.1	99.11	337	3	0	1	337	1	337	0	684	100	337	338	XCT	XAP5 CIRCADIAN TIMEKEEPER	Nucleus	protein_coding	XAP5 family protein
LOC9314603	42	2	166503	168574	0.141278375149343	-2.31902717290847e-05	0.179346559191235	0.0655912478717318	34.3141665188608	3.67876538862601	3.45553344951672	3.45468082629007	XP_002878536.1	AT2G21160.1	AT2G21160.1	0	GO:0000325; GO:0005739; GO:0005773; GO:0005783; GO:0005789; GO:0005794; GO:0005886; GO:0009535;GO:0005789	AT2G21160.1	N0.HOG0017260	AT2G21160.1	OG0011424	AT2G21160.1	AT2G21160.1	258	259	100	99	258	97.287	513	AT2G21160.1	97.287	258	7	0	1	258	1	258	0	513	100	258	259			Unknown	protein_coding	Translocon-associated protein (TRAP), alpha subunit
LOC9314604	67	2	168896	171477	0.129162011173184	0.00113498825268026	0.142536978933214	0.055578696467008	15.9905500240689	2.68773122009439	3.45352112048855	3.45257408730493	XP_002880361.1	AT2G21170.1	AT2G21170.1	0	GO:0004807; GO:0005739; GO:0006096; GO:0006642; GO:0009507; GO:0009570; GO:0009579; GO:0009658; GO:0009941; GO:0019253; GO:0019563; GO:0046166; GO:0048046; GO:0080022; GO:0005829; GO:0006094	AT2G21170.1	N0.HOG0017261	AT2G21170.1	OG0011425	AT2G21170.1	AT2G21170.1	314	316	100	99	315	98.413	625	AT2G21170.1	98.413	315	4	1	1	314	1	315	0	625	100	314	316	PDTPI, TIM	PLASTID ISOFORM TRIOSE PHOSPHATE ISOMERASE, triosephosphate isomerase	Chloroplast	protein_coding	triosephosphate isomerase
LOC9316429	49	2	176444	186359	0.245243128964059	-0.0182572439853636	0.479166666666667	0.111956097712412	22.6754136681857	4.50265703125799	3.44711372986385	3.4441063857936	XP_002880362.1	AT2G21180.1	AT2G21180.1	0	GO:0016020	AT2G21180.1	N0.HOG0023580	AT2G21180.1	OG0017564	AT2G21180.1	AT2G21180.1	130	132	100	99	131	93.13	189	AT2G21180.1	93.13	131	8	1	1	130	1	131	1.39e-63	189	100	130	132			Unknown	protein_coding	NULL
LOC9316430	41	2	179139	186919	0.245243128964059	-0.0299967329506361	0.479166666666667	0.103763552322978	18.3985388322721	3.65779070912445	3.44485671512575	3.44219791369291	XP_020883930.1	AT2G21185.1	AT2G21185.1	0	GO:0016020	AT2G21185.1	N0.HOG0025864	AT2G21185.1	OG0019737	AT2G21185.1	AT2G21185.1	93	94	100	99	93	98.925	182	AT2G21185.1	98.925	93	1	0	1	93	1	93	7.32e-62	182	100	93	94			Unknown	protein_coding	NULL
LOC9316431	41	2	188336	190433	0.155464289291796	-0.0515716507294326	0.188157117136928	0.104351449777961	32.0640689438482	8.36447870756221	3.4370984906335	3.43628857887574	XP_002878537.1	AT2G21190.1	AT2G21190.1	0	GO:0005789; GO:0006621; GO:0015031; GO:0046923; GO:0016020	AT2G21190.1	N0.HOG0007564	AT2G21190.1	OG0003052	AT2G21190.1, AT4G38790.1	AT2G21190.1	269	270	100	99	269	97.026	535	AT2G21190.1	97.026	269	8	0	1	269	1	269	0	535	100	269	270			Unknown	protein_coding	ER lumen protein retaining receptor family protein
LOC9314605	23	2	190514	191434	0.128461405330564	-0.0119947048181588	0.211890243902439	0.0704066451389272	11.8688860398521	3.10149649617079	3.43526166032141	3.43481187149242	XP_020883929.1	AT2G21195.4	AT2G21195.4	0	GO:0006979	AT2G21195.4	N0.HOG0023581	AT2G21195.4	OG0017565	AT2G21195.4	AT2G21195.4	120	117	100	99	120	85	201	AT2G21195.4	85	120	14	2	1	120	1	116	1.02e-68	201	100	120	117			Mitochondrion	protein_coding	NULL
LOC9314606	15	2	191398	191827	0.0355805243445693	-0.0327533747085541	0.159275427359145	0.0451496815974084	9.04350722702343	1.40158411007487	3.43450060338917	3.43433241711959	XP_020883931.1	AT2G21200.1	AT2G21200.1	0	GO:0009733	AT2G21200.1	N0.HOG0028358	AT2G21200.1	OG0022020	AT2G21200.1	AT2G21200.1	85	87	99	97	84	92.857	164	AT2G21200.1	92.857	84	6	0	1	84	3	86	5.16e-55	164	99	85	87	SAUR7	SMALL AUXIN UPREGULATED RNA 7	Mitochondrion	protein_coding	SAUR-like auxin-responsive protein family
LOC9316432	33	2	192793	194587	0.0966603824400754	-0.0479062588111426	0.415266106442577	0.0903471101109675	33.8554437940491	5.65116271246851	3.43333370567598	3.43265188395951	XP_020883925.1	AT2G16220.1, AT2G16450.1, AT2G15640.1, AT2G02660.1, AT2G02890.1	AT2G16450.1	0	GO:0046685		N0.HOG0001205	AT2G16220.1, AT2G16450.1, AT2G15640.1, AT2G02660.1, AT2G02890.1	OG0000169	AT1G47300.1, AT1G47340.1, AT1G47350.1, AT2G02660.1, AT2G02890.1, AT2G15640.1, AT2G16220.1, AT2G16450.1, AT2G23160.1		NA	NA	NA	NA	NA	NA	NA	AT2G16450.1	76.289	388	84	6	23	410	39	418	0	601	94	413	428	ASRF	Arsenic Stress-Related F-box	Chloroplast (AT2G16450.1), Nucleus (AT2G15640.1), Unknown (AT2G16220.1;AT2G02660.1;AT2G02890.1)	protein_coding	F-box and associated interaction domains-containing protein (AT2G16220.1;AT2G16450.1), F-box associated ubiquitination effector family protein (AT2G02660.1), F-box family protein (AT2G15640.1;AT2G02890.1)
LOC9314607	14	2	194555	195094	0.0326468877254218	-0.0568161864599743	0.213359846811018	0.0704491608794212	21.1493306296379	4.05356819536695	3.43186896639174	3.43164181849994	XP_002880365.1	AT2G21210.2	AT2G21210.2	0	GO:0009733; GO:0010200	AT2G21210.2	N0.HOG0026741	AT2G21210.2	OG0020528	AT2G21210.2	AT2G21210.2	98	166	100	59	98	91.837	164	AT2G21210.2	91.837	98	8	0	1	98	68	165	2.3e-63	189	100	98	166	SAUR6	SMALL AUXIN UPREGULATED RNA 6	Mitochondrion	protein_coding	NULL
LOC9316433	25	2	203808	206046	0.176611132635929	0.00478703034282654	0.176611132635929	0.0747163826935014	16.7521670379749	4.60142992489425	3.42383061894881	3.42296591652482	XP_020884102.1	AT2G21220.1	AT2G21220.1	0	GO:0005886; GO:0009733; GO:0009741	AT2G21220.1	N0.HOG0005684	AT2G21220.1	OG0002011	AT2G21220.1, AT4G38860.1	AT2G21220.1	104	105	99	98	103	95.146	205	AT2G21220.1	95.146	103	5	0	1	103	1	103	1.68e-70	205	99	104	105	SAUR12	SMALL AUXIN UPREGULATED RNA 12	Mitochondrion	protein_coding	SAUR-like auxin-responsive protein family
LOC9314608	63	2	207056	209811	0.26390977443609	-0.0142987510704842	0.26390977443609	0.0566242994202992	16.4457067928534	2.78038141773867	3.42115848224768	3.41997602214834	XP_020884101.1	NA	NA	0	NA	NA	NA	NA	NA	NA	NA	NA	NA	NA	NA	NA	NA	NA	NA	NA	NA	NA	NA	NA	NA	NA	NA	NA	NA	NA	NA	NA	NA	NA	NA	NA	NA
LOC9316434	63	2	209936	213019	0.161919368974584	-0.021051023696749	0.275816993464052	0.0680905394359388	27.634227134444	3.46638323972816	3.41869728150337	3.41758035217462	XP_020884099.1	NA	NA	0	NA	NA	NA	NA	NA	NA	NA	NA	NA	NA	NA	NA	NA	NA	NA	NA	NA	NA	NA	NA	NA	NA	NA	NA	NA	NA	NA	NA	NA	NA	NA	NA	NA
LOC9316436	39	2	216000	217811	0.191419141914191	-0.0106861902988692	0.210025062656642	0.0819732427446024	21.5982913354045	5.20351345539419	3.41376053636969	3.41295292208574	XP_020885000.1	AT2G21240.1	AT2G21240.1	0	GO:0003677; GO:0005634; GO:0009723; GO:0042803; GO:0050793; GO:0003700; GO:0043565	AT2G21240.1	N0.HOG0005995	AT2G21240.1	OG0002167	AT2G21240.1, AT4G38910.2	AT2G21240.1	296	297	100	99	296	94.932	594	AT2G21240.1	94.932	296	15	0	1	296	1	296	0	594	100	296	297	ATBPC4, BBR, BPC4	BASIC PENTACYSTEINE 4, basic pentacysteine 4	Nucleus	protein_coding	basic pentacysteine 4
LOC9316437	49	2	217965	219918	0.142078681552366	-0.0456175108849901	0.16945658448091	0.0738831918584232	12.6156429917348	3.96279670098447	3.41210342349282	3.41133201778424	XP_002880370.1	AT2G21250.1	AT2G21250.1	0	GO:0005739; GO:0005829; GO:0047641;GO:0016491; GO:0016491; GO:0047641; GO:0004033	AT2G21250.1	N0.HOG0012128	AT2G21260.1, AT2G21250.1	OG0006669	AT2G21250.1, AT2G21260.1	AT2G21250.1	309	310	100	99	309	97.735	630	AT2G21250.1	97.735	309	7	0	1	309	1	309	0	630	100	309	310			Cytoplasm	protein_coding	NAD(P)-linked oxidoreductase superfamily protein
LOC9316438	36	2	220351	221953	0.143512424713813	-0.0352938813606595	0.157886597938144	0.06121918725099	13.5985016461717	3.44204634251246	3.41009109446465	3.40948298953844	XP_020884999.1	AT2G21260.1	AT2G21260.1	0	GO:0005739; GO:0005829; GO:0047641;GO:0016491; GO:0004033; GO:0016491; GO:0047641	AT2G21260.1	N0.HOG0012128	AT2G21260.1, AT2G21250.1	OG0006669	AT2G21250.1, AT2G21260.1		NA	NA	NA	NA	NA	NA	NA	AT2G21260.1	93.528	309	20	0	1	309	1	309	0	612	100	309	310			Cytoplasm	protein_coding	NAD(P)-linked oxidoreductase superfamily protein
LOC9316439	32	2	222118	224691	0.0933614825240441	-0.0381568202109096	0.117906741469696	0.0540318191299019	9.93618209424177	2.30217777032932	3.40841120050445	3.40758145755126	XP_020884995.1	AT2G21270.3	AT2G21270.3	0	GO:0006511; GO:0031593; GO:0034098; GO:0036503	AT2G21270.3	N0.HOG0010982	AT2G21270.3	OG0005617	AT2G21270.3	AT2G21270.3	319	341	100	94	319	97.492	648	AT2G21270.3	97.492	319	8	0	1	319	22	340	0	648	100	319	341	UFD1	ubiquitin fusion degradation 1	Chloroplast	protein_coding	ubiquitin fusion degradation 1
LOC9314609	44	2	224882	227404	0.124924088164898	-0.0017293117765656	0.153621601897464	0.0544747026116028	19.0261870539401	3.01855337765773	3.40618624803179	3.40501927361462	XP_002880372.2	AT2G21280.2	AT2G21280.2	0	GO:0009507; GO:0009536; GO:0009706; GO:0009941; GO:0010020; GO:0016491; GO:0042803	AT2G21280.2	N0.HOG0021680	AT2G21280.2	OG0015707	AT2G21280.2	AT2G21280.2	365	363	100	99	365	95.342	713	AT2G21280.2	95.342	365	14	1	1	365	1	362	0	713	100	365	363	ATSULA, GC1, SULA	GIANT CHLOROPLAST 1	Chloroplast	protein_coding	NULL
LOC9316440	8	2	227508	228017	0.160259379342288	-0.0061904424200818	0.160259379342288	0.0707494990520035	10.7150460569813	2.56469092981748	3.4039756392042	3.40386141738358	XP_020885005.1	AT2G21290.1	AT2G21290.1	0	GO:0005739; GO:0005840; GO:1990904; GO:0009536; GO:0032544	AT2G21290.1	N0.HOG0020234	AT2G21290.1	OG0014274	AT2G21290.1	AT2G21290.1	95	99	100	99	98	89.796	156	AT2G21290.1	89.796	98	7	1	1	95	1	98	1.19e-51	157	100	95	99	bTHXm	Ribosomal Protein bTHXm	Mitochondrion	protein_coding	NULL
LOC9314610	95	2	229082	234727	0.201207927021076	-0.00260189171996236	0.251851851851852	0.0638785474460002	27.2938704278897	2.57394178557935	3.40273280454655	3.40011961445364	XP_020884326.1	AT2G21300.1	AT2G21300.1	0	GO:0003777; GO:0005524; GO:0005874; GO:0007018; GO:0008017	AT2G21300.1	N0.HOG0015296	AT2G21300.1	OG0009610	AT2G21300.1	AT2G21300.1	862	863	100	99	862	97.332	1740	AT2G21300.1	97.332	862	23	0	1	862	1	862	0	1740	100	862	863			Cytoplasm	protein_coding	ATP binding microtubule motor family protein
LOC9316442	44	2	243320	245215	0.191905615292712	-0.0080357601188035	0.191905615292712	0.0792047053053604	25.5995898745815	3.67265083005417	3.39069933008124	3.3900139991575	XP_002878543.1	AT2G21320.1	AT2G21320.1	0	GO:0000976; GO:0003700; GO:0005634; GO:0006355; GO:0008270; GO:0010100; GO:0070370; GO:0071483; GO:0009640	AT2G21320.1	N0.HOG0023582	AT2G21320.1	OG0017566	AT2G21320.1	AT2G21320.1	169	173	98	95	165	97.576	331	AT2G21320.1	97.576	165	4	0	1	165	1	165	1.75e-118	331	98	169	173	BBX18	B-box domain protein 18	Unknown	protein_coding	B-box zinc finger family protein
LOC9314611	33	2	245289	247630	0.158383890538273	-0.00448673287651063	0.158383890538273	0.0746174163513655	19.776248000226	4.21271533339583	3.38905993582475	3.38802108262935	XP_002880375.1	AT2G21330.1	AT2G21330.1	0	GO:0004332; GO:0005739; GO:0006094; GO:0006096; GO:0009507; GO:0009534; GO:0009570; GO:0009579; GO:0009941; GO:0010287; GO:0022626; GO:0031977; GO:0048046	AT2G21330.1	N0.HOG0004633	AT2G21330.1	OG0001465	AT2G21330.1, AT4G38970.1	AT2G21330.1	400	400	100	99	400	98.25	804	AT2G21330.1	98.25	400	6	1	1	400	1	399	0	804	100	400	400	AtFBA1, FBA1	fructose-bisphosphate aldolase 1	Chloroplast	protein_coding	fructose-bisphosphate aldolase 1
LOC9316443	142	2	248498	256616	0.391278375149343	0.0268207803212596	0.391278375149343	0.0991366836179281	20.2469051259025	4.00707102540319	3.38626630001248	3.38300480824795	NA	NA	NA	0	NA	NA	NA	NA	NA	NA	NA	NA	NA	NA	NA	NA	NA	NA	NA	NA	NA	NA	NA	NA	NA	NA	NA	NA	NA	NA	NA	NA	NA	NA	NA	NA	NA
LOC9314613	93	2	262065	266148	0.174641148325359	0.0136735498791541	0.174641148325359	0.0577131745817861	17.7100625596454	2.82697485650646	3.37487660208742	3.37302879403306	XP_002878546.2	AT2G21340.1	AT2G21340.1	0	GO:0009507; GO:0009941; GO:0015297; GO:0031969; GO:0042910;GO:0015297; GO:0016020; GO:0042910; GO:0055085	AT2G21340.1	N0.HOG0012129	AT2G21340.1	OG0006670	AT2G21340.1	AT2G21340.1	543	560	98	97	543	92.081	985	AT2G21340.1	92.081	543	29	4	14	543	18	559	0	985	98	543	560	EDS5H	EDS5 HOMOLOGUE	Chloroplast	protein_coding	MATE efflux family protein
LOC9314614	40	2	266010	267133	0.167682926829268	0.000575580559617701	0.167682926829268	0.0706524240808626	11.0605962679132	2.87895946670449	3.37156659505282	3.37116661829148	XP_002880376.2	AT2G21350.1	AT2G21350.1	0	GO:0003723; GO:0005739; GO:0009507	AT2G21350.1	N0.HOG0026094	AT2G21350.1	OG0019944	AT2G21350.1	AT2G21350.1	218	223	99	99	229	80.349	332	AT2G21350.1	80.349	229	24	7	4	218	1	222	3.25e-117	332	99	218	223			Chloroplast	protein_coding	RNA-binding CRS1 / YhbY (CRM) domain protein
LOC9316444	92	2	267228	269853	0.397435897435897	0.0260024652275868	0.397435897435897	0.0975884181096278	36.6363599175422	6.25446939780891	3.37055241497238	3.3693913684392	XP_020885616.1	NA	NA	0	NA	NA	NA	NA	NA	NA	NA	NA	NA	NA	NA	NA	NA	NA	NA	NA	NA	NA	NA	NA	NA	NA	NA	NA	NA	NA	NA	NA	NA	NA	NA	NA	NA
LOC9316445	109	2	271557	279110	0.6	0.0162789365720277	0.6	0.086677426426331	32.3985914807823	3.46483388585754	3.36680787986671	3.36380683788829	XP_020883934.1	AT2G21380.1	AT2G21380.1	0	GO:0003777; GO:0005524; GO:0005874; GO:0007018; GO:0008017; GO:0009507; GO:0046872	AT2G21380.1	N0.HOG0023583	AT2G21380.1	OG0017567	AT2G21380.1	AT2G21380.1	1061	1059	100	99	1061	95.57	2087	AT2G21380.1	95.57	1061	44	1	1	1061	1	1058	0	2087	100	1061	1059	Kin7.2	kinesin 7.2	Chloroplast	protein_coding	Kinesin motor family protein
LOC9314615	1	2	281585	282783	-0.044158972300281	-0.044158972300281	0.044158972300281	0.044158972300281	0.231859248358464	0.231859248358464	3.35841009755334	3.35841009755334	NA	NA	NA	0	NA	NA	NA	NA	NA	NA	NA	NA	NA	NA	NA	NA	NA	NA	NA	NA	NA	NA	NA	NA	NA	NA	NA	NA	NA	NA	NA	NA	NA	NA	NA	NA	NA
LOC9314616	61	2	284420	287057	0.237327188940092	0.0133718198650775	0.237327188940092	0.0946042098920848	27.1261981375042	4.72919452727738	3.35603833365473	3.35484675989256	XP_002878549.1	AT2G21385.1	AT2G21385.1	0	GO:0005739; GO:0009507; GO:0009570; GO:0009941; GO:0043461	AT2G21385.1	N0.HOG0021682	AT2G21385.1	OG0015709	AT2G21385.1	AT2G21385.1	329	331	100	99	330	96.667	650	AT2G21385.1	96.667	330	10	1	1	329	1	330	0	650	100	329	331	AtCGLD11, BFA3, CGLD11	CONSERVED IN THE GREEN LINEAGE AND DIATOMS 11, biogenesis factors required for ATP synthase 3, CONSERVED IN THE GREEN LINEAGE AND DIATOMS 11	Chloroplast	protein_coding	NULL
LOC9314617	42	2	287228	292206	0.154196157735086	-0.0178033602196091	0.154196157735086	0.0529601633911081	12.8666654356315	2.44175411290593	3.35359063281166	3.3524832190383	XP_020884275.1	AT2G21390.1	AT2G21390.1	0	GO:0000139; GO:0005198; GO:0005739; GO:0006886; GO:0006888; GO:0030126; GO:0005515; GO:0016192; GO:0006890; GO:0006891; GO:0030117	AT2G21390.1	N0.HOG0003748	AT2G21390.1	OG0001035	AT1G62020.1, AT2G21390.1	AT2G21390.1	1221	1219	100	99	1221	96.724	2447	AT2G21390.1	96.724	1221	37	2	1	1221	1	1218	0	2447	100	1221	1219	a2-COP	alpha2-COP	Unknown	protein_coding	Coatomer, alpha subunit
LOC9314618	76	2	293234	297294	0.582995951417004	-0.0298682124463817	0.582995951417004	0.118835972296569	13.2079283618587	1.97928897348105	3.34856782580759	3.34705327233187	XP_020884273.1	AT2G21390.1	AT2G21390.1	0	GO:0000139; GO:0005198; GO:0005739; GO:0006886; GO:0006888; GO:0030126; GO:0005515; GO:0016192; GO:0006890; GO:0006891; GO:0030117	AT2G21390.1	N0.HOG0003748	AT2G21390.1	OG0001035	AT1G62020.1, AT2G21390.1		NA	NA	NA	NA	NA	NA	NA	AT2G21390.1	90.41	1220	92	5	1	1198	1	1217	0	2237	99	1199	1219	a2-COP	alpha2-COP	Unknown	protein_coding	Coatomer, alpha subunit
LOC9314619	17	2	298281	299507	0.0843241196516472	-0.0492577395547425	0.192478632478633	0.0875515520948674	15.9841539584564	4.05192750075278	3.34434657543949	3.34374027105157	XP_020885613.1	AT2G21400.2	AT2G21400.2	0	GO:0003677; GO:0003700; GO:0005634; GO:0009734; GO:0009851; GO:0046872;GO:0003700; GO:0006355; GO:0045893	AT2G21400.2	N0.HOG0024579	AT2G21400.2	OG0018527	AT2G21400.2	AT2G21400.2	208	191	93	99	193	86.01	324	AT2G21400.2	86.01	193	24	2	16	208	1	190	4.96e-120	338	93	208	191	SRS3	SHI-related sequence3	Mitochondrion	protein_coding	NULL
LOC9314620	107	2	302090	307984	0.116776045939294	-0.0501880910040592	0.28744019138756	0.065716437571691	34.3926945508269	3.85403368783536	3.34100534988328	3.33857330167103	XP_020883982.1	AT2G21410.1	AT2G21410.1	0	GO:0000220; GO:0000325; GO:0005739; GO:0005773; GO:0005774; GO:0005794; GO:0009678; GO:0009705; GO:0015986; GO:0032119; GO:0043181; GO:0046961; GO:0070072; GO:0007035; GO:0016471; GO:0033179; GO:0051117; GO:1902600	AT2G21410.1	N0.HOG0005997	AT2G21410.1, AT4G39080.1	OG0002168	AT2G21410.1, AT4G39080.1	AT2G21410.1	819	822	100	99	821	97.077	1648	AT2G21410.1	97.077	821	22	1	1	819	1	821	0	1648	100	819	822	VHA-A2	vacuolar proton ATPase A2	Cytoplasm	protein_coding	vacuolar proton ATPase A2
LOC110229150	29	2	309032	311118	0.161869935809744	0.00651996217813818	0.161869935809744	0.0753562403713106	14.9906835366752	4.1779799675155	3.33527548555192	3.33454515253283	XP_020884071.1	NA	NA	0	NA	NA	NA	NA	NA	NA	NA	NA	NA	NA	NA	NA	NA	NA	NA	NA	NA	NA	NA	NA	NA	NA	NA	NA	NA	NA	NA	NA	NA	NA	NA	NA	NA
LOC9314621	42	2	311082	312571	0.180554920692965	-0.0219530749406691	0.180554920692965	0.0599806921778865	23.0957140363057	3.69330713353318	3.33350362351453	3.3329967343657	XP_002880378.1	AT2G21430.1	AT2G21430.1	0	GO:0000323; GO:0006508; GO:0008234	AT2G21430.1	N0.HOG0007117	AT2G21430.1	OG0002791	AT2G21430.1, AT4G39090.1	AT2G21430.1	360	362	100	99	361	95.291	719	AT2G21430.1	95.291	361	16	1	1	360	1	361	0	719	100	360	362			Extracellular	protein_coding	Papain family cysteine protease
LOC9316446	94	2	312629	318190	0.144110576923077	-0.0216904541708959	0.201539201539202	0.0594076263206291	17.1382523402077	2.84692606248358	3.33223632028589	3.32975607247348	XP_020884069.1	NA	NA	0	NA	NA	NA	NA	NA	NA	NA	NA	NA	NA	NA	NA	NA	NA	NA	NA	NA	NA	NA	NA	NA	NA	NA	NA	NA	NA	NA	NA	NA	NA	NA	NA	NA
LOC9316447	80	2	319537	324213	0.176603200274449	-0.0242721103949537	0.248491704374057	0.0870053743861092	38.9932498046641	5.30916323600901	3.32635542580944	3.32478674783247	XP_020882743.1	NA	NA	0	NA	NA	NA	NA	NA	NA	NA	NA	NA	NA	NA	NA	NA	NA	NA	NA	NA	NA	NA	NA	NA	NA	NA	NA	NA	NA	NA	NA	NA	NA	NA	NA	NA
LOC9316448	8	2	324184	324998	0.0924041619771688	-0.0119885288889717	0.0924041619771688	0.0528543755864949	4.08964282344901	1.85938109795715	3.32246829799695	3.32216866347027	XP_020883408.1	AT2G21455.1	AT2G21455.1	0		AT2G21455.1	N0.HOG0032549	AT2G21455.1	OG0026132	AT2G21455.1	AT2G21455.1	195	212	95	90	191	76.963	270	AT2G21455.1	76.963	191	39	1	7	192	21	211	5.63e-93	270	95	195	212			Nucleus	protein_coding	NULL
LOC9316449	4	2	333188	333688	0.177544677544678	0.0516790026563202	0.177544677544678	0.100872525079938	13.5169812472528	7.24927534439436	3.31476744808495	3.31463434749619	XP_002880382.1	AT2G21465.1	AT2G21465.1	0	GO:0005576; GO:0031640; GO:0050832	AT2G21465.1	N0.HOG0017980	AT2G21465.1	OG0012109	AT1G47317.1, AT2G21465.1	AT2G21465.1	82	81	100	99	82	76.829	124	AT2G21465.1	76.829	82	17	1	1	82	1	80	2.88e-39	124	100	82	81			Extracellular	protein_coding	Defensin-like (DEFL) family protein
LOC9316450	40	2	335471	339476	0.148514851485149	0.0053945940175979	0.175797503467406	0.0667077194825608	11.3529486170789	3.04454436979467	3.31296689875744	3.31146482380885	XP_020884194.1	AT2G21470.2	AT2G21470.2	0	GO:0005524; GO:0005634; GO:0009506; GO:0009793; GO:0016740; GO:0016925; GO:0019948; GO:0046872; GO:0031510; GO:0005737; GO:0032446; GO:0008641	AT2G21470.2	N0.HOG0013525	AT2G21470.2	OG0007942	AT2G21470.2	AT2G21470.2	625	701	85	76	531	98.117	1087	AT2G21470.2	98.117	531	10	0	1	531	1	531	0	1087	85	625	701	ATSAE2, EMB2764, SAE2	SUMO-ACTIVATING ENZYME 2, EMBRYO DEFECTIVE 2764, SUMO-activating enzyme 2	Nucleus	protein_coding	SUMO-activating enzyme 2
LOC9314622	55	2	339463	342509	0.149390384172993	-0.00856678203042036	0.149390384172993	0.0488978572000524	13.9701268676565	2.18012201656001	3.30959445467962	3.30837162442108	XP_020884193.1	AT2G21480.1	AT2G21480.1	0	GO:0004674; GO:0004714; GO:0005524; GO:0006468; GO:0016324; GO:0080092; GO:0004672; GO:0005886; GO:0009506; GO:0046777	AT2G21480.1	N0.HOG0005999	AT2G21480.1	OG0002169	AT2G21480.1, AT4G39110.1	AT2G21480.1	870	872	100	99	871	97.704	1769	AT2G21480.1	97.704	871	19	1	1	870	1	871	0	1769	100	870	872	BUPS2	Buddhas Paper Seal 2	Cell_membrane	protein_coding	Malectin/receptor-like protein kinase family protein
LOC9316452	12	2	343842	345333	0.109395109395109	-0.0186367203271239	0.109395109395109	0.0527557168568761	3.93853247436976	1.04624637098269	3.30582629474679	3.30540371971327	XP_002880385.1	AT2G21490.1	AT2G21490.1	0	GO:0005829; GO:0009409; GO:0009414; GO:0009737; GO:0046872; GO:0009415; GO:0009631	AT2G21490.1	N0.HOG0023584	AT2G21490.1	OG0017568	AT2G21490.1	AT2G21490.1	187	186	100	99	188	80.319	197	AT2G21490.1	80.319	188	33	3	1	187	1	185	4.26e-69	207	100	187	186	LEA	dehydrin LEA	Nucleus	protein_coding	dehydrin LEA
LOC9316453	52	2	345914	348480	0.130286603078753	-0.011318545229329	0.188187261839956	0.0603076630568919	14.8878184409286	2.62107614674133	3.30415990068782	3.30311083504529	XP_020884886.1	NA	NA	0	NA	NA	NA	NA	NA	NA	NA	NA	NA	NA	NA	NA	NA	NA	NA	NA	NA	NA	NA	NA	NA	NA	NA	NA	NA	NA	NA	NA	NA	NA	NA	NA	NA
LOC9316455	48	2	355318	357785	0.164862555191568	-0.00660051287919288	0.188836510213842	0.0696732601894765	10.9460037419747	2.22540822689225	3.29619664644553	3.29522523363033	XP_020884488.1	AT2G21510.2	AT2G21510.2	0		AT2G21510.2	N0.HOG0004840	AT2G21510.2	OG0001569	AT2G21510.2, AT4G39150.1	AT2G21510.2	351	354	100	99	353	96.884	694	AT2G21510.2	96.884	353	9	2	1	351	1	353	0	694	100	351	354			Cytoplasm	protein_coding	NULL
LOC9316456	105	2	361426	365048	0.148809523809524	-0.0308679257915001	0.201814058956916	0.0736233913311011	20.3051270378633	3.98248413409174	3.29101352811427	3.28940936217148	XP_020884479.1	AT2G21520.2	AT2G21520.2	0	GO:0000139; GO:0005886; GO:0015031	AT2G21520.2	N0.HOG0021683	AT2G21520.2	OG0015710	AT2G21520.2	AT2G21520.2	641	638	100	99	642	97.04	1284	AT2G21520.2	97.04	642	13	3	1	641	1	637	0	1284	100	641	638			Mitochondrion	protein_coding	Sec14p-like phosphatidylinositol transfer family protein
LOC9314623	44	2	365211	366645	0.155067155067155	-0.00121526606255646	0.185526954832443	0.0643335027285774	8.96483489046644	2.20793719654459	3.28788070728341	3.28732607994892	XP_020884490.1	AT2G21530.1	AT2G21530.1	0	GO:0005773; GO:0009507; GO:0009535; GO:0009570; GO:0005515	AT2G21530.1	N0.HOG0023585	AT2G21530.1	OG0017569	AT2G21530.1	AT2G21530.1	204	210	100	99	209	88.995	369	AT2G21530.1	88.995	209	18	1	1	204	1	209	4.45e-132	369	100	204	210			Chloroplast	protein_coding	SMAD/FHA domain-containing protein
LOC9314624	128	2	366559	370814	0.225355329949239	-0.0127234202166722	0.26763258611263	0.0655136144353583	21.2921711689346	2.34100230938817	3.28672646572763	3.28516852570922	XP_002880389.1	NA	NA	0	NA	NA	NA	NA	NA	NA	NA	NA	NA	NA	NA	NA	NA	NA	NA	NA	NA	NA	NA	NA	NA	NA	NA	NA	NA	NA	NA	NA	NA	NA	NA	NA	NA
LOC9316457	61	2	375599	378176	0.169641986147693	-0.0152967861501829	0.196153846153846	0.0650127092323871	19.0784805396259	3.84475286191839	3.27903236576626	3.2778997710808	XP_020883409.1	AT2G21550.1	AT2G21550.1	0	GO:0004146; GO:0004799; GO:0006231; GO:0006730; GO:0032259; GO:0046654; GO:0005739; GO:0005829; GO:0016741	AT2G21550.1	N0.HOG0015300	AT2G21550.1	OG0009611	AT2G21550.1	AT2G21550.1	500	493	94	97	476	85.294	816	AT2G21550.1	85.294	476	62	2	2	469	3	478	0	838	94	500	493	DHFR-TS3, DRTS3	dihydrofolate reductase thymidylate synthase 3	Cytoplasm	protein_coding	Bifunctional dihydrofolate reductase/thymidylate synthase
LOC9314625	28	2	378284	379583	0.163302302792749	-0.0270654928381148	0.210648148148148	0.0811214039676732	17.2329090336185	4.06826075732355	3.27675763240779	3.2762677487149	XP_020884489.1	AT2G21560.1	AT2G21560.1	0	GO:0016020	AT2G21560.1	N0.HOG0012130	AT2G21560.1	OG0006671	AT2G21560.1	AT2G21560.1	265	275	100	98	270	85.185	458	AT2G21560.1	85.185	270	35	1	1	265	1	270	1.66e-165	458	100	265	275			Nucleus	protein_coding	NULL
LOC110229539	13	2	388107	389891	0.109329694695548	0.0280337866523523	0.109329694695548	0.0509464626123257	10.5119621998685	2.14208638923153	3.26824510093391	3.26775482086686	NA	NA	NA	0	NA	NA	NA	NA	NA	NA	NA	NA	NA	NA	NA	NA	NA	NA	NA	NA	NA	NA	NA	NA	NA	NA	NA	NA	NA	NA	NA	NA	NA	NA	NA	NA	NA
LOC9316458	21	2	391702	392844	0.15755404725993	0.0118173072911203	0.15755404725993	0.057142202856402	10.0187929699624	2.67145243402315	3.26550377723893	3.2650951865743	XP_002878558.2	AT2G21580.1	AT2G21580.1	0	GO:0000325; GO:0003729; GO:0003735; GO:0005773; GO:0009506; GO:0022626; GO:0022627;GO:0005840; GO:1990904	AT2G21580.1	N0.HOG0002661	AT2G21580.1, AT4G39200.1	OG0000599	AT2G16360.1, AT2G21580.1, AT4G34555.1, AT4G39200.1	AT2G21580.1	108	109	100	99	108	100	219	AT2G21580.1	100	108	0	0	1	108	1	108	3.44e-76	219	100	108	109	eS25y	Ribosomal Protein eS25y	Cytoplasm	protein_coding	Ribosomal protein S25 family protein
LOC9314626	78	2	395248	399383	0.150501672240803	0.00187663653155796	0.150501672240803	0.0597392891381665	12.0154141496675	2.26246837662857	3.26134159578449	3.25880440829653	XP_020884615.1	NA	NA	0	NA	NA	NA	NA	NA	NA	NA	NA	NA	NA	NA	NA	NA	NA	NA	NA	NA	NA	NA	NA	NA	NA	NA	NA	NA	NA	NA	NA	NA	NA	NA	NA	NA
LOC9314627	40	2	399726	402162	0.167433475156847	-0.00778435897867796	0.167433475156847	0.0607332625833475	16.5630611319067	3.19799794812986	3.25571388015721	3.25426870402556	XP_020885216.1	AT2G21600.1	AT2G21600.1	0	GO:0005783; GO:0005794; GO:0005801; GO:0006890; GO:0016020; GO:0000139; GO:0006621	AT2G21600.1	N0.HOG0003994	AT2G21600.1	OG0001154	AT2G21600.1, AT4G39220.1	AT2G21600.1	195	196	100	99	195	96.41	391	AT2G21600.1	96.41	195	7	0	1	195	1	195	2.55e-141	391	100	195	196	ATRER1B, RER1B	endoplasmatic reticulum retrieval protein 1B, endoplasmatic reticulum retrieval protein 1B	Cell_membrane	protein_coding	endoplasmatic reticulum retrieval protein 1B
LOC9314628	25	2	402757	404802	0.0939785838172084	0.0139868676603158	0.0939785838172084	0.0407067250546218	7.18375781652312	1.65302635058189	3.25187651396337	3.25081530203789	XP_002880391.2	AT2G21610.2	AT2G21610.2	0	GO:0016020; GO:0030599; GO:0042545; GO:0045490; GO:0052689	AT2G21610.2	N0.HOG0019319	AT2G21610.2	OG0013389	AT2G21610.2	AT2G21610.2	357	358	97	96	346	92.775	618	AT2G21610.2	92.775	346	24	1	1	346	1	345	0	618	97	357	358	ATPE11, PE11	A. THALIANA PECTINESTERASE 11, pectinesterase 11	Mitochondrion	protein_coding	NULL
LOC9316459	61	2	417125	419071	0.15	-0.0146469237324758	0.198006644518272	0.0800420342102592	15.408842646764	3.61211852026585	3.23372899601272	3.23246383730291	XP_020884185.1	AT2G21620.2	AT2G21620.2	0	GO:0005773; GO:0005829; GO:0005886; GO:0016787;GO:0016787	AT2G21620.2	N0.HOG0021684	AT2G21620.2	OG0015711	AT2G21620.2	AT2G21620.2	194	194	100	99	194	97.938	384	AT2G21620.2	97.938	194	3	1	1	194	1	193	2.5e-138	384	100	194	194	RD2	RESPONSIVE TO DESICCATION 2	Cytoplasm	protein_coding	Adenine nucleotide alpha hydrolases-like superfamily protein
LOC9314629	68	2	419105	422826	0.176990335941095	-0.0184727783756806	0.176990335941095	0.0668959891417799	14.7824692041623	3.51023780294632	3.2312242769254	3.228948743688	XP_020884184.1	AT2G21630.1	AT2G21630.1	0	GO:0005789; GO:0006886; GO:0008270; GO:0030127; GO:0090114; GO:0006888; GO:0005096; GO:0070971; GO:0090110	AT2G21630.1	N0.HOG0015301	AT2G21630.1	OG0009612	AT2G21630.1	AT2G21630.1	761	762	100	99	761	95.532	1508	AT2G21630.1	95.532	761	34	0	1	761	1	761	0	1508	100	761	762	AtSEC23C	NULL	Cytoplasm	protein_coding	Sec23/Sec24 protein transport family protein
LOC9314630	30	2	423235	424554	0.118203309692671	0.000516561059943643	0.118203309692671	0.0552700602808452	6.53454219704916	1.90767959015252	3.22585069988295	3.22509894699114	XP_002878563.1	AT2G21640.1	AT2G21640.1	0	GO:0005739	AT2G21640.1	N0.HOG0021685	AT2G21640.1	OG0015712	AT2G21640.1	AT2G21640.1	104	105	100	99	104	88.462	193	AT2G21640.1	88.462	104	12	0	1	104	1	104	7.9e-66	193	100	104	105			Nucleus	protein_coding	NULL
LOC9307194	45	3	1703410	1706085	0.151401111625753	-0.0350550899286416	0.172894314958688	0.0697171650765248	18.0095061979821	3.01666219510421	3.22461688600102	3.22366125450765	XP_020875985.1	AT5G04920.1	AT5G04920.1	0	GO:0000814; GO:0005769; GO:0005770; GO:0005886; GO:0007033; GO:0009793; GO:0015031; GO:0032266; GO:0032509; GO:0043130; GO:0071985; GO:0090351; GO:0031902; GO:0043328	AT5G04920.1	N0.HOG0020856	AT5G04920.1	OG0014889	AT5G04920.1	AT5G04920.1	436	441	100	99	436	95.872	875	AT5G04920.1	95.872	436	18	0	1	436	1	436	0	875	100	436	441	VPS36	NULL	Chloroplast	protein_coding	EAP30/Vps36 family protein
LOC9309244	37	3	1709707	1714954	0.116666666666667	-0.0212431821700326	0.179565968888035	0.0543269851789506	18.2859540747092	2.70922076287468	3.23324975701017	3.23060646724305	XP_002871124.1	AT5G04930.1	AT5G04930.1	0	GO:0000287; GO:0005524; GO:0005789; GO:0005886; GO:0015914; GO:0016020; GO:0016887; GO:0140326; GO:0000166; GO:0045332; GO:0005215	AT5G04930.1	N0.HOG0011781	AT5G04930.1	OG0006348	AT5G04930.1	AT5G04930.1	1161	1159	100	99	1161	98.019	2359	AT5G04930.1	98.019	1161	20	1	1	1161	1	1158	0	2359	100	1161	1159	ALA1	aminophospholipid ATPase 1	Unknown	protein_coding	aminophospholipid ATPase 1
LOC9307195	39	3	1715033	1717816	0.15	0.0256240777676893	0.152288970446204	0.051463691016272	8.14172429639294	2.02116193953567	3.23671404726456	3.23549259674841	XP_020875938.1	AT5G04940.1	AT5G04940.1	0	GO:0000775; GO:0001228; GO:0005634; GO:0008168; GO:0008270; GO:0010385; GO:0031490; GO:0032259; GO:0040029; GO:0042054; GO:0003690; GO:0005515	AT5G04940.1	N0.HOG0008130	AT5G04940.1	OG0003408	AT5G04940.1	AT5G04940.1	658	671	100	99	670	93.284	1213	AT5G04940.1	93.284	670	33	1	1	658	1	670	0	1231	100	658	671	SUVH1	SU(VAR)3-9 homolog 1	Nucleus	protein_coding	SU(VAR)3-9 homolog 1
LOC9309245	14	3	1718467	1719868	0.171090005325759	0.0112509063178249	0.171090005325759	0.0697877370936575	12.8233132513704	4.26361624150655	3.23865561791935	3.23798158016395	XP_020876009.1	AT5G04950.1	AT5G04950.1	0	GO:0009555; GO:0009860; GO:0010233; GO:0030410; GO:0030418	AT5G04950.1	N0.HOG0016638	AT5G04950.1	OG0010848	AT5G04950.1	AT5G04950.1	320	321	100	99	320	97.5	647	AT5G04950.1	97.5	320	8	0	1	320	1	320	0	647	100	320	321	ATNAS1, NAS1	ARABIDOPSIS THALIANA NICOTIANAMINE SYNTHASE 1, nicotianamine synthase 1	Unknown	protein_coding	nicotianamine synthase 1
LOC9307196	43	3	1729520	1731710	0.234972677595628	-0.00503549058472282	0.251618871415356	0.090933303128581	17.5562359821885	4.7056336835825	3.25102926214542	3.24984211762364	XP_020875948.1	AT5G04960.1	AT5G04960.1	0	GO:0016020; GO:0030599; GO:0042545; GO:0045490; GO:0046910; GO:1902066; GO:0004857	AT5G04960.1	N0.HOG0007028	AT5G04960.1	OG0002736	AT3G10710.1, AT5G04960.1	AT5G04960.1	571	565	100	99	571	92.82	1082	AT5G04960.1	92.82	571	34	1	1	571	1	564	0	1082	100	571	565	PME46, PMEI-PME46	PECTIN METHYLESTERASE46	Mitochondrion	protein_coding	Plant invertase/pectin methylesterase inhibitor superfamily
LOC9309247	53	3	1735947	1738960	0.118506493506494	-0.0326718623839389	0.224799373654335	0.0571483523472545	16.5992111084439	2.45054943832634	3.25846644750691	3.25703640147705	XP_002873179.1	AT5G04980.2	AT5G04980.2	0	GO:0004445; GO:0046856; GO:0004439; GO:0034485; GO:0016791	AT5G04980.2	N0.HOG0014733	AT5G04980.2	OG0009078	AT5G04980.2	AT5G04980.2	469	467	100	99	469	96.588	939	AT5G04980.2	96.588	469	13	2	1	469	1	466	0	939	100	469	467			Chloroplast	protein_coding	DNAse I-like superfamily protein
LOC9309248	38	3	1739187	1741782	0.113179636038852	-0.0219860036064623	0.170762722226298	0.0465072904436408	17.1513632923465	2.36038124489529	3.26143967100696	3.26014223181024	XP_002873180.1	AT5G04990.1	AT5G04990.1	0	GO:0005635; GO:0005637; GO:0005783; GO:0005789; GO:0005856; GO:0006997; GO:0009524; GO:0043495; GO:0051260; GO:0051291; GO:0070197; GO:0090435; GO:2000769	AT5G04990.1	N0.HOG0014732	AT5G04990.1	OG0009077	AT5G04990.1	AT5G04990.1	476	472	100	99	476	93.067	838	AT5G04990.1	94.118	476	23	2	1	476	1	471	0	866	100	476	472	ATSUN1, SUN1	ARABIDOPSIS SAD1/UNC-84 DOMAIN PROTEIN 1, SAD1/UNC-84 domain protein 1	Nucleus	protein_coding	SAD1/UNC-84 domain protein 1
LOC9309249	38	3	1741848	1744186	0.14883855981417	0.025840814966449	0.14883855981417	0.0603869024600876	9.80509395214841	2.22614233597938	3.26391976444696	3.26282792280281	XP_020876012.1	AT5G05000.1	AT5G05000.1	0	GO:0003924; GO:0005525; GO:0005886; GO:0006886; GO:0009507; GO:0009536; GO:0009707; GO:0009941; GO:0015450; GO:0019750; GO:0042802; GO:0045036; GO:0046872	AT5G05000.1	N0.HOG0016637	AT5G05000.1	OG0010847	AT5G05000.1	AT5G05000.1	313	314	100	99	313	93.93	603	AT5G05000.1	93.93	313	19	0	1	313	1	313	0	603	100	313	314	ATTOC34, OEP34, TOC34	ARABIDOPSIS THALIANA TRANSLOCON AT THE OUTER ENVELOPE MEMBRANE OF CHLOROPLASTS 34, translocon at the outer envelope membrane of chloroplasts 34	Chloroplast	protein_coding	translocon at the outer envelope membrane of chloroplasts 34
LOC9309250	26	3	1744341	1747839	0.169380223597091	-0.0184606648109645	0.174109589041096	0.0791754604563069	15.8136661786302	4.28494530746644	3.26767291749803	3.26562008705178	XP_002871127.1	AT5G05010.1	AT5G05010.1	0	GO:0000139; GO:0005886; GO:0006890; GO:0009506; GO:0015031; GO:0030126; GO:0006888; GO:0051645	AT5G05010.1	N0.HOG0009008	AT5G05010.1	OG0003992	AT5G05010.1	AT5G05010.1	527	528	100	99	528	96.023	1035	AT5G05010.1	96.023	528	19	2	1	527	1	527	0	1035	100	527	528			Unknown	protein_coding	clathrin adaptor complexes medium subunit family protein
LOC9307198	15	3	1748133	1750164	0.092546255506608	-0.0309215328517514	0.15484176126591	0.0741318854106456	16.5734347236742	5.25925802705695	3.26971765343734	3.26892616937445	XP_020876004.1	AT5G05030.1	AT5G05030.1	0		AT5G05030.1	N0.HOG0003765	AT5G05030.1, AT5G11660.1	OG0001043	AT5G04937.1, AT5G05030.1, AT5G11660.1	AT5G05030.1	364	364	100	99	365	91.507	692	AT5G05030.1	91.507	365	28	2	1	364	1	363	0	692	100	364	364			Extracellular	protein_coding	Protein of Unknown Function (DUF239)
LOC9309252	30	3	1774385	1777097	0.223626373626374	-0.0649645061406541	0.34	0.105826935486026	7.70542560914238	1.88232548230006	3.29771155339352	3.29681439369085	XP_020876000.1			0								NA	NA	NA	NA	NA	NA	NA	AT5G05470.1	29.63	135	80	2	6	125	10	144	1.5e-08	55.5	33	368	345
LOC9307201	6	3	1777441	1779724	0.192935635792779	-0.039014723138809	0.192935635792779	0.103326601736402	7.21019850460673	2.83587811214673	3.30039075583266	3.2991942104743	NA	NA	NA	0	NA	NA	NA	NA	NA	NA	NA	NA	NA	NA	NA	NA	NA	NA	NA	NA	NA	NA	NA	NA	NA	NA	NA	NA	NA	NA	NA	NA	NA	NA	NA	NA	NA
LOC9309253	2	3	1780817	1781371	-0.0133928571428571	-0.0467421951618175	0.080091533180778	0.0467421951618175	0.645205053594011	0.336047425151644	3.30219614831187	3.30205274856638	NA	NA	NA	0	NA	NA	NA	NA	NA	NA	NA	NA	NA	NA	NA	NA	NA	NA	NA	NA	NA	NA	NA	NA	NA	NA	NA	NA	NA	NA	NA	NA	NA	NA	NA	NA	NA
LOC9309254	5	3	1788392	1790386	0.112112112112112	0.022290345827887	0.12710970464135	0.0953564499066493	2.82441878243463	1.82081538889083	3.31131183285261	3.31080941791696	NA	NA	NA	0	NA	NA	NA	NA	NA	NA	NA	NA	NA	NA	NA	NA	NA	NA	NA	NA	NA	NA	NA	NA	NA	NA	NA	NA	NA	NA	NA	NA	NA	NA	NA	NA	NA
LOC110227850	5	3	1790950	1792361	0.0578678349762687	0.000182591933205573	0.0621219416774504	0.0448259414546906	4.32336219758847	2.38962267176999	3.31356702597235	3.31334047500753	XP_020879322.1	AT5G05430.2, AT5G05420.1	AT5G05420.1	0	GO:0000398; GO:0003723; GO:0016607;GO:0003755; GO:0003755; GO:0005730		N0.HOG0025634	AT5G05430.2, AT5G05420.1	OG0019524	AT5G05420.1, AT5G05430.2		NA	NA	NA	NA	NA	NA	NA	AT5G05420.1	80.822	146	24	2	14	159	1	142	2.44e-77	226	91	160	144			Chloroplast (AT5G05420.1), Mitochondrion (AT5G05430.2)	protein_coding	FKBP-like peptidyl-prolyl cis-trans isomerase family protein (AT5G05420.1), NULL (AT5G05430.2)
LOC9309255	13	3	1794169	1796810	0.0682634221049945	-0.0409937975985812	0.183547411874837	0.0720244329317994	28.5297835914977	5.54569541723721	3.31799591163706	3.31665555651733	XP_002873187.2	AT5G05430.2	AT5G05430.2	0	GO:0000398; GO:0003723; GO:0016607; GO:0003755; GO:0005730; GO:0003676	AT5G05430.2	N0.HOG0025634	AT5G05430.2, AT5G05420.1	OG0019524	AT5G05420.1, AT5G05430.2		NA	NA	NA	NA	NA	NA	NA	AT5G05430.2	80.11	181	31	2	1	181	1	176	3.23e-96	284	49	368	197			Mitochondrion	protein_coding	NULL
LOC9309256	8	3	1797902	1800489	0.056910569105691	-0.0669020072841979	0.243336886993603	0.0870820305130016	8.45739988511699	2.7714973821681	3.31998184336419	3.3197087132734	NA	NA	NA	0	NA	NA	NA	NA	NA	NA	NA	NA	NA	NA	NA	NA	NA	NA	NA	NA	NA	NA	NA	NA	NA	NA	NA	NA	NA	NA	NA	NA	NA	NA	NA	NA	NA
LOC9309257	17	3	1801883	1804142	0.272727272727273	0.0386881976061578	0.272727272727273	0.0965306750407691	14.6606342251737	1.86492567368972	3.32565593401313	3.32427916294839	XP_002873189.1	AT5G05040.1, AT5G05060.1	AT5G05060.1	0	GO:0004869; GO:0010466				OG0001421	AT5G05040.1, AT5G05060.1		NA	NA	NA	NA	NA	NA	NA	AT5G05060.1	62.609	115	41	2	60	173	58	171	7.5e-42	137	66	173	173			Nucleus	protein_coding	Cystatin/monellin superfamily protein
LOC9309259	35	3	1813957	1816104	0.173377530791979	0.00937360994300962	0.173377530791979	0.0674045919386742	15.0028494870626	3.30109359662727	3.33800894518229	3.33713062542563	XP_002871133.1	AT5G05070.1	AT5G05070.1	0	GO:0005789; GO:0019706; GO:0030659; GO:0005783; GO:0005794; GO:0006612; GO:0016409; GO:0018230	AT5G05070.1	N0.HOG0014731	AT5G05070.1	OG0009076	AT5G05070.1	AT5G05070.1	413	414	100	99	413	96.126	829	AT5G05070.1	96.126	413	16	0	1	413	1	413	0	829	100	413	414	PAT3	NULL	Mitochondrion	protein_coding	DHHC-type zinc finger family protein
LOC9307204	35	3	1816148	1818320	0.0827093361858917	-0.0168726608993994	0.112103174603175	0.0429305068760955	15.1569355317366	1.44475777806694	3.34040547474184	3.33951551204592	XP_020876025.1	AT5G05080.1	AT5G05080.1	0	GO:0004842; GO:0005524; GO:0006511; GO:0016567; GO:0061631	AT5G05080.1	N0.HOG0011780	AT5G05080.1	OG0006347	AT5G05080.1	AT5G05080.1	254	252	100	99	254	97.244	509	AT5G05080.1	97.244	254	4	1	1	254	1	251	0	509	100	254	252	ATUBC22, UBC22	ubiquitin-conjugating enzyme 22	Unknown	protein_coding	ubiquitin-conjugating enzyme 22
LOC9309260	8	3	1826381	1827037	0.210526315789474	-0.0804221980916524	0.210526315789474	0.133053777039021	1.50021479444637	0.747419064188512	3.34937775953708	3.34932295297968	NA	NA	NA	0	NA	NA	NA	NA	NA	NA	NA	NA	NA	NA	NA	NA	NA	NA	NA	NA	NA	NA	NA	NA	NA	NA	NA	NA	NA	NA	NA	NA	NA	NA	NA	NA	NA
LOC9307206	26	3	1829719	1832027	0.0633625410733845	-0.00650492237020703	0.0819029946909953	0.0315698424051425	4.33674522039714	1.04809058656821	3.35452467558209	3.35321340513681	XP_020876026.1	AT3G09160.1	AT3G09160.1	0	GO:0003723; GO:0003676		N0.HOG0000630	AT3G09160.1	OG0000068	AT3G09160.1, AT5G03480.1, AT5G03495.1, AT5G53700.1		NA	NA	NA	NA	NA	NA	NA	AT5G05430.2	50.299	167	79	2	18	183	13	176	1.42e-45	150	66	253	197			Nucleus	protein_coding	RNA-binding (RRM/RBD/RNP motifs) family protein
LOC9309261	22	3	1835094	1836300	0.0973758045882159	-0.00249318548983526	0.120562130177515	0.0540607040675999	5.27926759684152	1.60350241894871	3.35885349092081	3.35841531982144	XP_002871136.1	AT5G05090.1	AT5G05090.1	0	GO:0003677; GO:0003700; GO:0006355; GO:0005634	AT5G05090.1	N0.HOG0016636	AT5G05090.1	OG0010846	AT5G05090.1	AT5G05090.1	265	267	100	99	266	95.489	517	AT5G05090.1	95.489	266	11	1	1	265	1	266	0	517	100	265	267			Nucleus	protein_coding	Homeodomain-like superfamily protein
LOC9307207	27	3	1837164	1839099	0.159554291133238	0.00454024451593713	0.206728160607705	0.0730637429318367	21.9916231298685	3.44467123113	3.36176584690298	3.36094407809769	XP_020876008.1	AT5G05100.1	AT5G05100.1	0	GO:0003676; GO:0009651	AT5G05100.1	N0.HOG0020855	AT5G05100.1	OG0014888	AT5G05100.1	AT5G05100.1	324	325	100	99	324	95.062	585	AT5G05100.1	95.062	324	16	0	1	324	1	324	0	597	100	324	325	MUG13.4	NULL	Nucleus	protein_coding	Single-stranded nucleic acid binding R3H protein
LOC9309262	46	3	1839298	1840833	0.118124312431243	-0.0272032281788612	0.181488801054018	0.0650560182867871	9.78995676795229	2.33496343089478	3.36362179037161	3.36290266105676	XP_002873194.1	AT5G05110.1	AT5G05110.1	0	GO:0004869; GO:0005576; GO:0006952; GO:0010466	AT5G05110.1	N0.HOG0025028	AT5G05110.1	OG0018963	AT5G05110.1	AT5G05110.1	233	233	100	99	233	91.416	427	AT5G05110.1	91.416	233	17	1	1	233	1	230	3.05e-154	427	100	233	233	CYS7	NULL	Extracellular	protein_coding	Cystatin/monellin family protein
LOC9309263	3	3	1844308	1844993	-0.0461538461538462	-0.115351733356131	0.21545393858478	0.115351733356131	6.90638677574002	2.66050661917337	3.36782164910467	3.36772192266296	NA	NA	NA	0	NA	NA	NA	NA	NA	NA	NA	NA	NA	NA	NA	NA	NA	NA	NA	NA	NA	NA	NA	NA	NA	NA	NA	NA	NA	NA	NA	NA	NA	NA	NA	NA	NA
LOC9307208	39	3	1847078	1848427	0.103174603174603	-0.0656727928826471	0.294117647058823	0.0904657775655412	4.65155469149713	0.74071768506346	3.37146028868991	3.37071384817741	XP_020876067.1	AT5G05113.1	AT5G05113.1	0		AT5G05113.1	N0.HOG0030675	AT5G05113.1	OG0024280	AT5G05113.1	AT5G05113.1	113	86	77	99	87	72.414	115	AT5G05113.1	72.414	87	22	2	1	87	1	85	3.67e-35	115	77	113	86			Mitochondrion	protein_coding	NULL
LOC9309264	14	3	1849083	1850152	0.094487245334703	-0.0152732147225417	0.163052208835341	0.0580628403534979	15.9440916603913	3.41346691011319	3.37315735762037	3.37272229487762	XP_002871138.2	AT5G05120.1	AT5G05120.1	0	GO:0003700; GO:0006355; GO:0009788	AT5G05120.1	N0.HOG0020261	AT5G05120.1	OG0014301	AT5G05120.1	AT5G05120.1	211	202	92	95	195	78.974	314	AT5G05120.1	78.974	195	38	1	8	202	1	192	1.59e-110	314	92	211	202			Nucleus	protein_coding	C2H2 and C2HC zinc fingers superfamily protein
LOC9307209	59	3	1850238	1853238	0.122773703509691	-0.00884148335246492	0.149421039664942	0.0576969324401345	10.2039661909402	2.39718913910061	3.37639571590164	3.37481382489139	XP_002871139.1	AT5G05130.1	AT5G05130.1	0	GO:0003676; GO:0004386; GO:0005524; GO:0005634; GO:0006281; GO:0008094; GO:0008270; GO:0016818; GO:0140658	AT5G05130.1	N0.HOG0023204	AT5G05130.1	OG0017203	AT5G05130.1	AT5G05130.1	861	882	100	98	862	95.592	1701	AT5G05130.1	95.592	862	37	1	1	861	20	881	0	1701	100	861	882			Unknown	protein_coding	DNA/RNA helicase protein
LOC9307210	51	3	1856891	1860045	0.219436428450178	0.0136769471211285	0.219436428450178	0.0647419705335015	23.4287003387783	2.90270909762383	3.38332326475758	3.3821688856807	XP_020875975.1	AT5G05140.1	AT5G05140.1	0	GO:0003746; GO:0005634	AT5G05140.1	N0.HOG0010233	AT5G05140.1	OG0004978	AT5G05140.1	AT5G05140.1	446	437	100	99	448	93.973	855	AT5G05140.1	93.973	448	13	4	1	446	1	436	0	855	100	446	437			Nucleus	protein_coding	Transcription elongation factor (TFIIS) family protein
LOC9309265	48	3	1863353	1866336	0.188459828299757	-0.019747889027739	0.190827423167849	0.0714781465207912	13.8611765739851	2.8569078841346	3.38983402586403	3.38834008508025	XP_002873197.1	AT5G05150.1	AT5G05150.1	0	GO:0005774; GO:0006914; GO:0015031; GO:0034045; GO:0005515	AT5G05150.1	N0.HOG0023203	AT5G05150.1	OG0017202	AT5G05150.1	AT5G05150.1	373	375	99	99	370	90.811	694	AT5G05150.1	90.811	370	34	0	1	370	1	370	0	694	99	373	375	ATATG18E, ATG18E, G18E	ARABIDOPSIS THALIANA HOMOLOG OF YEAST AUTOPHAGY 18E, autophagy-related gene 18E, autophagy-related gene 18E	Unknown	protein_coding	autophagy-related gene 18E
LOC9309266	60	3	1866447	1868752	0.13474913065077	0.00326677191275233	0.135013262599469	0.0530193846191906	12.8574461930985	2.29313736567779	3.39241006301864	3.39149197795743	XP_002871141.1	AT5G05160.1	AT5G05160.1	0	GO:0004674; GO:0005524; GO:0006468; GO:0016020; GO:2000605; GO:0004672; GO:0005515	AT5G05160.1	N0.HOG0020854	AT5G05160.1	OG0014887	AT5G05160.1	AT5G05160.1	638	641	100	99	640	95.469	1241	AT5G05160.1	95.469	640	27	2	1	638	1	640	0	1241	100	638	641	RUL1	REDUCED IN LATERAL GROWTH1	Unknown	protein_coding	Leucine-rich repeat protein kinase family protein
LOC9307212	97	3	1868841	1874276	0.165686274509804	0.00982926333486973	0.165686274509804	0.0471088339092476	14.0360673037508	2.11842655928612	3.39811819821148	3.39574933183802	XP_020875913.1	AT5G05170.1	AT5G05170.1	0	GO:0000139; GO:0005768; GO:0005794; GO:0005802; GO:0005886; GO:0006952; GO:0009506; GO:0009833; GO:0009834; GO:0016760; GO:0030244; GO:0042803; GO:0046872; GO:0071555; GO:0016020	AT5G05170.1	N0.HOG0008333	AT5G05170.1	OG0003551	AT5G05170.1	AT5G05170.1	1065	1066	100	99	1065	98.967	2185	AT5G05170.1	98.967	1065	11	0	1	1065	1	1065	0	2185	100	1065	1066	ATCESA3, ATH-B, CESA3, CEV1, ELI1, IXR1, MRE1	CELLULOSE SYNTHASE 3, CONSTITUTIVE EXPRESSION OF VSP 1, ECTOPIC LIGNIFICATION 1, ISOXABEN RESISTANT 1, multiple response expansion 1	Cell_membrane	protein_coding	Cellulose synthase family protein
LOC9309267	36	3	1874755	1877198	0.147916666666667	0.00462402363153162	0.21578555472822	0.0621026639422114	12.8468991358495	2.1754734983008	3.40108729510014	3.39976021699983	XP_020875986.1	AT5G05180.1	AT5G05180.1	0	GO:0005200; GO:0005856	AT5G05180.1	N0.HOG0011779	AT5G05180.1	OG0006346	AT5G05180.1	AT5G05180.1	436	433	100	99	463	75.594	640	AT5G05180.1	75.594	463	55	5	1	436	1	432	0	640	100	436	433			Cytoplasm	protein_coding	NULL
LOC9307213	59	3	1882403	1885354	0.157513270722744	-0.0251092966771026	0.214506172839506	0.0651757168239543	12.0072548991303	2.69623058402589	3.409435429924	3.40786312104526	XP_020875945.1	AT5G05190.1	AT5G05190.1	0	GO:0005768; GO:0005886; GO:0006897; GO:0006952; GO:0009620; GO:0009863; GO:0030100; GO:1900150	AT5G05190.1	N0.HOG0014729	AT5G05190.1	OG0009074	AT5G05190.1	AT5G05190.1	614	616	100	99	615	92.52	1127	AT5G05190.1	92.52	615	45	1	1	614	1	615	0	1129	100	614	616	EDR4	ENHANCED DISEASE RESISTANCE4	Nucleus	protein_coding	Protein of unknown function (DUF3133)
LOC9307214	51	3	1885272	1888508	0.139080459770115	-0.0259008367238871	0.14335844440152	0.0654195672590816	13.1657726173706	3.69389902129195	3.4127563204329	3.41130943743166	XP_020875957.1	AT5G05200.1	AT5G05200.1	0	GO:0005524; GO:0005886; GO:0009507; GO:0010287; GO:0016301; GO:0016310	AT5G05200.1	N0.HOG0014728	AT5G05200.1	OG0009073	AT5G05200.1	AT5G05200.1	540	541	100	99	540	96.296	1073	AT5G05200.1	96.296	540	20	0	1	540	1	540	0	1073	100	540	541			Chloroplast	protein_coding	Protein kinase superfamily protein
LOC9309268	27	3	1888703	1891004	0.162148337595908	0.0541685353276462	0.162148337595908	0.0816791752392178	11.4825460421906	3.32058198750491	3.41528077494526	3.41450176241899	XP_020875999.1	AT5G05210.1	AT5G05210.1	0	GO:0005634; GO:0003677; GO:0003723; GO:0005730; GO:0042273; GO:0042274	AT5G05210.1	N0.HOG0013006	AT5G05210.1	OG0007470	AT5G05210.1	AT5G05210.1	372	387	100	99	386	88.342	645	AT5G05210.1	88.342	386	31	1	1	372	1	386	0	646	100	372	387			Cytoplasm	protein_coding	Surfeit locus protein 6
LOC9307215	13	3	1891506	1892248	0.114027694160145	-0.0443691818267626	0.14085443711428	0.0714038640501196	15.2131450364564	5.02518652681689	3.41663636678393	3.41642646510887	XP_002871145.1	AT5G05220.1	AT5G05220.1	0	GO:0009507	AT5G05220.1	N0.HOG0020853	AT5G05220.1	OG0014886	AT5G05220.1	AT5G05220.1	183	183	100	99	183	91.257	330	AT5G05220.1	91.257	183	15	1	1	183	1	182	8.86e-118	330	100	183	183			Chloroplast	protein_coding	NULL
LOC9307216	50	3	1892865	1895450	0.164502164502165	-0.0165221376788074	0.164502164502165	0.0612938802054001	11.9928408730511	2.25733175790706	3.41993765588877	3.41864608842567	XP_020876003.1	AT5G05230.1	AT5G05230.1	0	GO:0004842; GO:0016567	AT5G05230.1	N0.HOG0020852	AT5G05230.1	OG0014885	AT5G05230.1	AT5G05230.1	365	364	100	99	365	96.164	723	AT5G05230.1	96.164	365	12	2	1	365	1	363	0	723	100	365	364			Nucleus	protein_coding	RING/U-box superfamily protein
LOC9307217	66	3	1895424	1898439	0.10652685966112	-0.0520195466839431	0.197928227894932	0.0709320958933261	11.6865433036572	3.0546327821706	3.42305015252292	3.42163450598377	XP_020875959.1	NA	NA	0	NA	NA	NA	NA	NA	NA	NA	NA	NA	NA	NA	NA	NA	NA	NA	NA	NA	NA	NA	NA	NA	NA	NA	NA	NA	NA	NA	NA	NA	NA	NA	NA	NA
LOC9309269	28	3	1899160	1900255	0.197905759162304	0.000115231416562042	0.197905759162304	0.0689775328604094	18.1337577269698	3.4653924242945	3.42493188731268	3.42453400091711	XP_002873201.1	AT5G05250.1	AT5G05250.1	0		AT5G05250.1	N0.HOG0023202	AT5G05250.1	OG0017201	AT5G05250.1	AT5G05250.1	244	240	100	99	244	88.525	369	AT5G05250.1	88.525	244	23	2	1	244	1	239	1.93e-133	375	100	244	240			Unknown	protein_coding	NULL
LOC9309270	45	3	1901627	1903887	0.159722222222222	-0.0118741700797931	0.172064777327935	0.0688902506788322	18.3099755756993	2.80497840182985	3.42862623615156	3.42749749331075	XP_002873202.1	AT5G05260.2	AT5G05260.2	0	GO:0005506; GO:0005789; GO:0016020; GO:0016709; GO:0020037; GO:0043436; GO:0102684; GO:0004497; GO:0016705	AT5G05260.2	N0.HOG0009007	AT5G35917.1, AT5G05260.2	OG0003991	AT5G05260.2, AT5G35917.1	AT5G05260.2	532	530	100	99	532	92.481	989	AT5G05260.2	92.481	532	37	2	1	532	1	529	0	1014	100	532	530	CYP79A2	cytochrome p450 79a2	Mitochondrion	protein_coding	NULL
LOC9309271	46	3	1904676	1906556	0.149228130360206	-0.0136788442298752	0.149228130360206	0.0570675083946594	10.8819321955573	1.85051997889898	3.43141479379231	3.43070279633843	XP_020876036.1	NA	NA	0	NA	NA	NA	NA	NA	NA	NA	NA	NA	NA	NA	NA	NA	NA	NA	NA	NA	NA	NA	NA	NA	NA	NA	NA	NA	NA	NA	NA	NA	NA	NA	NA	NA
LOC9307218	22	3	1908361	1910690	0.294139579025862	0.0528261496632892	0.294139579025862	0.0969669086606513	36.2936494736363	5.81836998690837	3.43562084244244	3.43439289419671	XP_020876043.1	AT5G05280.1	AT5G05280.1	0	GO:0004842; GO:0009555; GO:0009901; GO:0016020; GO:0016567; GO:0046872; GO:0048443; GO:0080141; GO:0016740	AT5G05280.1	N0.HOG0023201	AT5G05280.1	OG0017200	AT5G05280.1	AT5G05280.1	178	177	100	99	178	95.506	347	AT5G05280.1	95.506	178	6	1	1	178	1	176	3.01e-124	347	100	178	177	ATL73, DAF	Arabidopsis Toxicos en Levadura 73, DEFECTIVE IN ANTHER DEHISCENCE1- ( DAD1-) Activating Factor	Unknown	protein_coding	RING/U-box superfamily protein
LOC9309272	23	3	1912278	1913727	0.0995115995115995	-0.00893816018578706	0.0995115995115995	0.043520770652649	7.09603638773947	1.70410156180522	3.43879420659446	3.43810344773285	XP_002871148.1	AT5G05290.1	AT5G05290.1	0	GO:0005576; GO:0009653; GO:0009828; GO:0016020; GO:0009664	AT5G05290.1	N0.HOG0014727	AT5G05290.1	OG0009072	AT5G05290.1	AT5G05290.1	253	256	100	99	255	96.078	504	AT5G05290.1	96.078	255	8	1	1	253	1	255	0	504	100	253	256	ATEXP2, ATEXPA2, ATHEXP ALPHA 1.12, EXP2, EXPA2	expansin A2, EXPANSIN 2, expansin A2	Extracellular	protein_coding	expansin A2
LOC9307219	16	3	1913705	1914329	0.118549755464617	-0.0179712405208703	0.123704944475464	0.0787112013459197	7.55505910123549	3.7502372847236	3.43944517953982	3.43916502131403	XP_002873204.1	AT5G05300.1	AT5G05300.1	0	GO:0009651; GO:0042542; GO:0042742; GO:0045088	AT5G05300.1	N0.HOG0024405	AT5G05300.1	OG0018358	AT5G05300.1	AT5G05300.1	93	103	100	99	102	84.314	155	AT5G05300.1	84.314	102	7	3	1	93	1	102	3.24e-51	155	100	93	103	IDL6	NULL	Chloroplast	protein_coding	NULL
LOC9309273	43	3	1914835	1918458	0.127027027027027	-0.0267118147295521	0.196507352941176	0.0597882175426072	18.1252903244133	2.78977045101253	3.44366463967695	3.4416396011094	XP_020875956.1	NA	NA	0	NA	NA	NA	NA	NA	NA	NA	NA	NA	NA	NA	NA	NA	NA	NA	NA	NA	NA	NA	NA	NA	NA	NA	NA	NA	NA	NA	NA	NA	NA	NA	NA	NA
LOC110227109	6	3	1920440	1921277	0.563076923076923	-0.0301950111183555	0.563076923076923	0.217887318810663	12.5355186181372	4.3683399419173	3.44616020790963	3.44588888321133	XP_020876068.1	AT3G60245.1, AT3G10950.1	AT3G10950.1	0	GO:0003735; GO:0005829; GO:0006412; GO:0022625; GO:0046872; GO:0005840		N0.HOG0004397	AT3G60245.1, AT3G10950.1	OG0001355	AT3G10950.1, AT3G60245.1		NA	NA	NA	NA	NA	NA	NA	AT3G10950.1	96.154	78	3	0	1	78	15	92	1.01e-51	155	100	78	93	eL43y (AT3G60245), eL43z (AT3G10950)	Ribosomal Protein eL43y (AT3G60245), Ribosomal Protein eL43z (AT3G10950)	Cytoplasm	protein_coding	Zinc-binding ribosomal protein family protein
LOC9309274	12	3	1927861	1933162	0.106431796314114	-0.0183465493081052	0.141666666666667	0.0507490280863192	4.71594252591857	0.988544141810457	3.45820888148945	3.45671066364492	XP_020876060.1	AT3G60245.1	AT3G60245.1	0	GO:0003735; GO:0005829; GO:0006412; GO:0022625; GO:0046872; GO:0005840							NA	NA	NA	NA	NA	NA	NA	AT3G60245.1	88.636	44	5	0	35	78	15	58	1.11e-24	87.8	56	79	93	eL43y	Ribosomal Protein eL43y	Cytoplasm	protein_coding	Zinc-binding ribosomal protein family protein
LOC9307220	9	3	1929363	1932576	0.106431796314114	-0.0184972223761962	0.106431796314114	0.0421487326682216	4.71594252591857	1.16673673464347	3.45820888148945	3.45770944688425	XP_020876042.1	NA	NA	0	NA	NA	NA	NA	NA	NA	NA	NA	NA	NA	NA	NA	NA	NA	NA	NA	NA	NA	NA	NA	NA	NA	NA	NA	NA	NA	NA	NA	NA	NA	NA	NA	NA
LOC9307221	25	3	1932828	1934664	0.116991329805202	-0.0352268058417198	0.192257503262288	0.0630360933391993	15.4158492519553	2.68449189537416	3.46039804882709	3.45959946699263	XP_002873206.1	AT5G05330.1	AT5G05330.1	0	GO:0003677; GO:0005634; GO:0010197	AT5G05330.1	N0.HOG0016635	AT5G05330.1	OG0010845	AT5G05330.1	AT5G05330.1	188	221	100	85	188	90.426	353	AT5G05330.1	90.426	188	18	0	1	188	33	220	7.18e-126	353	100	188	221			Nucleus	protein_coding	HMG-box (high mobility group) DNA-binding family protein
LOC9309275	29	3	1934738	1936690	0.178280542986425	-0.0342360473075203	0.254545454545455	0.0690667713908575	9.83651283427591	2.35064083568149	3.46247167104607	3.46147605490192	XP_002873207.1	AT5G05340.1	AT5G05340.1	0	GO:0005794; GO:0006979; GO:0009505; GO:0009809; GO:0010089; GO:0020037; GO:0042744; GO:0046872; GO:0048046; GO:0140825; GO:1901430; GO:0004601	AT5G05340.1	N0.HOG0003607	AT5G58390.1, AT5G58400.1, AT5G05340.1	OG0000969	AT5G05340.1, AT5G58390.1, AT5G58400.1	AT5G05340.1	324	325	100	99	324	96.914	640	AT5G05340.1	96.914	324	10	0	1	324	1	324	0	640	100	324	325	PRX52	peroxidase 52	Extracellular	protein_coding	Peroxidase superfamily protein
LOC9309276	56	3	1943916	1946154	0.193863738908107	-0.044044003603653	0.219100294985251	0.0755802383049975	17.0754687102046	3.4137323372314	3.47226618315899	3.4709699850484	XP_020875962.1	AT5G05350.1	AT5G05350.1	0	GO:0016020; GO:0009975; GO:0051762	AT5G05350.1	N0.HOG0006173	AT5G05350.1	OG0002257	AT3G10980.1, AT5G05350.1	AT5G05350.1	527	527	99	99	527	91.651	955	AT5G05350.1	91.651	527	39	2	1	526	1	523	0	974	99	527	527			Nucleus	protein_coding	PLAC8 family protein
LOC9307222	47	3	1947305	1948779	0.155103626943005	-0.000185293386820689	0.155103626943005	0.0397875303996017	13.9192001863232	1.22019023817173	3.47497633518349	3.4742669750771	XP_020876007.1	AT2G16520.1	AT2G16520.1	0	GO:0003676; GO:0004523; GO:0004842; GO:0016567; GO:0046872	AT2G16520.1	N0.HOG0000978	AT2G26135.1, AT2G26130.1, AT3G43750.1, AT3G45560.1, AT2G16520.1, AT3G45460.1, AT3G45480.1, AT3G45510.1, AT3G45570.1, AT3G45580.1	OG0000119	AT2G16520.1, AT2G22940.1, AT2G26130.1, AT2G26135.1, AT3G43180.1, AT3G43750.1, AT3G45460.1, AT3G45480.1, AT3G45510.1, AT3G45540.1, AT3G45555.1, AT3G45560.1, AT3G45570.1, AT3G45580.1		NA	NA	NA	NA	NA	NA	NA	AT3G43750.1, AT3G45560.1	53.191	282	111	5	17	284	11	285	2.92e-92	278	82	328	347			Chloroplast	protein_coding	NULL
LOC110227104	19	3	1950751	1951675	0.129716981132076	0.00449236353862987	0.220853858784893	0.0551134990793683	4.15307254925706	0.846031278810062	3.47757197374217	3.47738345275908	XP_020876047.1	NA	NA	0	NA	NA	NA	NA	NA	NA	NA	NA	NA	NA	NA	NA	NA	NA	NA	NA	NA	NA	NA	NA	NA	NA	NA	NA	NA	NA	NA	NA	NA	NA	NA	NA	NA
LOC9307223	31	3	1955507	1956669	0.134523809523809	0.0154807011043124	0.134523809523809	0.0450541687634897	6.7328284706175	1.42305757315931	3.48312432935537	3.48253645362919	XP_020876046.1	AT5G05360.1	AT5G05360.1	0	GO:0005515	AT5G05360.1	N0.HOG0011778	AT5G05360.1	OG0006345	AT5G05360.1	AT5G05360.1	161	164	100	99	163	96.319	320	AT5G05360.1	96.319	163	4	1	1	161	1	163	2.81e-114	320	100	161	164			Nucleus	protein_coding	NULL
LOC9307224	16	3	1957333	1958140	0.0708513004095137	0.00461054481463984	0.0708513004095137	0.0269351736041123	3.07951575782455	0.613125945053542	3.4845975296184	3.48427558945238	XP_002871154.1	AT5G05365.1	AT5G05365.1	0	GO:0046872	AT5G05365.1	N0.HOG0020851	AT5G05365.1	OG0014884	AT5G05365.1	AT5G05365.1	77	78	100	99	77	97.403	149	AT5G05365.1	97.403	77	2	0	1	77	1	77	2.24e-49	149	100	77	78	AtHMP44	HEAVY METAL ASSOCIATED PROTEIN 44	Cytoplasm	protein_coding	Heavy metal transport/detoxification superfamily protein
LOC9307225	40	3	1958143	1959322	0.167814729268442	-0.00590061255470377	0.199721585325909	0.0571262983417337	21.7410555309053	2.92583213495645	3.48581487997581	3.48530016257999	XP_020876061.1	AT5G05370.1	AT5G05370.1	0	GO:0005743; GO:0005886; GO:0006122; GO:0045275; GO:0098803	AT5G05370.1	N0.HOG0003456	AT5G05370.1	OG0000898	AT3G10860.1, AT5G05370.1	AT5G05370.1	72	73	100	99	72	100	149	AT5G05370.1	100	72	0	0	1	72	1	72	2e-49	149	100	72	73			Mitochondrion	protein_coding	Cytochrome b-c1 complex, subunit 8 protein
LOC9309277	22	3	1959500	1960419	0.0390625	-0.0268627446336851	0.13386524822695	0.0395168482394709	5.30404005618283	0.955696542669522	3.4869723944682	3.48665511432497	XP_002871155.1	AT5G05380.2	AT5G05380.2	0	GO:0005783; GO:0010008; GO:0016192; GO:0016020; GO:0005794	AT5G05380.2	N0.HOG0016634	AT5G05380.2	OG0010844	AT5G05380.2	AT5G05380.2	216	285	100	76	216	98.611	419	AT5G05380.2	98.611	216	3	0	1	216	69	284	8.78e-151	419	100	216	285	PRA1.B3	prenylated RAB acceptor 1.B3	Cell_membrane	protein_coding	NULL
LOC9307226	46	3	1963506	1966800	0.198810135250813	0.00378374145319265	0.198810135250813	0.0672536271838322	19.24835669062	3.10766007017738	3.4901932146511	3.48958772302342	XP_002871156.1	AT5G05390.1	AT5G05390.1	0	GO:0005507; GO:0046274; GO:0048046; GO:0052716; GO:1990641; GO:0016491	AT5G05390.1	N0.HOG0014726	AT5G05390.1	OG0009071	AT5G05390.1	AT5G05390.1	565	566	100	99	565	97.699	1146	AT5G05390.1	97.699	565	13	0	1	565	1	565	0	1146	100	565	566	LAC12	laccase 12	Extracellular	protein_coding	laccase 12
LOC9307227	28	3	1967825	1969589	0.139903653151345	-0.0134520729777348	0.148804222332179	0.0338619067146873	16.8877378565761	1.93613906589579	3.48836326518663	3.48797880885368	XP_020876006.1	AT5G05410.1	AT5G05410.1	0	GO:0000976; GO:0003700; GO:0005634; GO:0009408; GO:0009414; GO:0010224; GO:0010286; GO:0042542; GO:0045893; GO:0071456;GO:0003677; GO:0006355; GO:0003677; GO:0006950	AT5G05410.1	N0.HOG0010232	AT5G05410.1	OG0004977	AT5G05410.1	AT5G05410.1	338	336	100	99	338	89.053	570	AT5G05410.1	89.053	338	34	2	1	338	1	335	0	588	100	338	336	DREB2, DREB2A	DEHYDRATION-RESPONSIVE ELEMENT BINDING PROTEIN 2, DRE-binding protein 2A	Nucleus	protein_coding	DRE-binding protein 2A
LOC9307228	18	3	1969735	1971524	0.193125442948264	-0.0577213167259009	0.203416149068323	0.108249889995004	11.3536916339333	3.7236718554343	3.48751615394671	3.48724343841869	XP_020876030.1	AT3G09160.1	AT3G09160.1	0	GO:0003723; GO:0003676; GO:0008143		N0.HOG0000630	AT3G09160.1	OG0000068	AT3G09160.1, AT5G03480.1, AT5G03495.1, AT5G53700.1		NA	NA	NA	NA	NA	NA	NA	AT5G05430.2	53.216	171	69	4	16	182	13	176	6.59e-51	164	69	241	197			Nucleus	protein_coding	RNA-binding (RRM/RBD/RNP motifs) family protein
LOC9309278	18	3	1972939	1974252	0.182555282555283	0.0546459072971946	0.182555282555283	0.0838836251323265	15.5532765163212	4.49095350748718	3.48622995531484	3.4859613676001	XP_002871158.1	AT5G05440.1	AT5G05440.1	0	GO:0004864; GO:0005634; GO:0005737; GO:0005886; GO:0009738; GO:0010427; GO:0038023	AT5G05440.1	N0.HOG0011777	AT5G05440.1	OG0006344	AT5G05440.1	AT5G05440.1	203	204	100	99	203	98.03	411	AT5G05440.1	98.03	203	4	0	1	203	1	203	3.99e-149	411	100	203	204	AtPYL5, PYL5, RCAR8	PYRABACTIN RESISTANCE 1-LIKE 5, regulatory component of ABA receptor 8	Nucleus	protein_coding	Polyketide cyclase/dehydrase and lipid transport superfamily protein
LOC9307230	42	3	1988678	1992129	0.191746031746032	-0.00738570745034989	0.191746031746032	0.0630280284160112	20.6087974302068	3.05103177985085	3.47965203998802	3.47909236647698	XP_002871160.1	AT5G05450.1	AT5G05450.1	0	GO:0003723; GO:0003724; GO:0005524; GO:0016887; GO:0003676	AT5G05450.1	N0.HOG0007435	AT5G05450.1, AT1G71370.1, AT1G71280.1	OG0002971	AT1G71280.1, AT1G71370.1, AT5G05450.1	AT5G05450.1	593	594	100	99	593	97.302	1190	AT5G05450.1	97.302	593	16	0	1	593	1	593	0	1190	100	593	594	RH18	RNA helicase 18	Nucleus	protein_coding	P-loop containing nucleoside triphosphate hydrolases superfamily protein
LOC9307231	4	3	1992439	1995841	0.0596217812697138	-0.0208133063570896	0.124276377217554	0.0651693593191725	6.1191423652521	2.84902083947479	3.47802834014857	3.47776167641459	XP_020875932.1	AT5G05460.1	AT5G05460.1	0	GO:0005737; GO:0005773; GO:0005829; GO:0006491; GO:0006517; GO:0033925; GO:0004553	AT5G05460.1	N0.HOG0014725	AT5G05460.1	OG0009070	AT5G05460.1	AT5G05460.1	690	681	97	98	671	94.188	1293	AT5G05460.1	94.188	671	33	1	20	690	16	680	0	1293	97	690	681	AtENGase85A, ENGase85A	Endo-beta-N-acetyglucosaminidase 85A	Unknown	protein_coding	Glycosyl hydrolase family 85
LOC9307232	17	3	1997145	1999057	0.117520625271385	-0.0735236245184253	0.171018455228982	0.0932276348401721	21.6594997931061	10.9761920614171	3.47585976895659	3.47559306201021	XP_002871162.1	AT5G05470.1	AT5G05470.1	0	GO:0003723; GO:0003743; GO:0005829; GO:0005850; GO:0005886; GO:0003676; GO:0006413; GO:0033290; GO:0043022	AT5G05470.1	N0.HOG0007027	AT2G40290.1, AT5G05470.1	OG0002735	AT2G40290.1, AT5G05470.1	AT5G05470.1	344	345	100	99	344	95.64	667	AT5G05470.1	95.64	344	15	0	1	344	1	344	0	667	100	344	345	ATEIF2-A2, EIF2 ALPHA, EIF2-A2	eukaryotic translation initiation factor 2 alpha subunit	Cytoplasm	protein_coding	eukaryotic translation initiation factor 2 alpha subunit
LOC9307233	27	3	1998924	2000986	0.117520625271385	-0.0404987000251329	0.171018455228982	0.0687694498464519	21.6594997931061	6.16724235217913	3.47535351714522	3.47490199189782	XP_020875947.1	AT5G05480.1	AT5G05480.1	0	GO:0000325	AT5G05480.1	N0.HOG0018614	AT5G05480.1	OG0012707	AT5G05480.1	AT5G05480.1	595	609	99	98	596	93.121	1078	AT5G05480.1	93.121	596	38	2	1	594	1	595	0	1089	99	595	609			Nucleus	protein_coding	Peptide-N4-(N-acetyl-beta-glucosaminyl)asparagine amidase A protein
LOC9309279	43	3	2001287	2006216	0.181159420289855	-0.00483606000792988	0.181159420289855	0.0684784460699702	7.03639916505588	2.28080006312096	3.47435108818539	3.47354579851129	XP_002871163.1	AT5G05490.1	AT5G05490.1	0	GO:0005634; GO:0005694; GO:0007062; GO:0008278; GO:0010032; GO:0051276; GO:0051455; GO:0051754; GO:0003682; GO:0005515	AT5G05490.1	N0.HOG0016633	AT5G05490.1	OG0010843	AT5G05490.1	AT5G05490.1	619	628	99	97	613	95.106	1215	AT5G05490.1	95.106	613	28	1	7	619	17	627	0	1215	99	619	628	AtREC8, DIF1, REC8, SYN1	DETERMINATE, INFERTILE 1, SYNAPTIC 1	Nucleus	protein_coding	Rad21/Rec8-like family protein
LOC9307234	14	3	2006426	2007252	0.078246243552366	0.0402537822606355	0.078246243552366	0.0542281708669376	4.10236287943422	1.95423256432009	3.47220014765351	3.47201715459471	XP_002871164.1	AT5G05500.1	AT5G05500.1	0	GO:0009826; GO:0031982; GO:0048767; GO:0071944	AT5G05500.1	N0.HOG0016632	AT5G05500.1	OG0010842	AT5G05500.1	AT5G05500.1	184	184	100	99	184	91.848	324	AT5G05500.1	91.848	184	14	1	1	184	1	183	8.85e-118	331	100	184	184	AtPRPL1, MOP10, PRPL1	proline-rich protein-like 1	Unknown	protein_coding	Pollen Ole e 1 allergen and extensin family protein
LOC9307235	66	3	2007283	2009839	0.26676745464541	0.0128867299729419	0.26676745464541	0.0631416151108114	15.2052671172752	2.39111572202011	3.47184459600821	3.4713237283033	XP_020875969.1	AT5G05510.1	AT5G05510.1	0	GO:0007094; GO:0004672; GO:0051754	AT5G05510.1	N0.HOG0016498	AT5G05510.1	OG0010713	AT5G05510.1	AT5G05510.1	469	472	100	99	471	93.418	889	AT5G05510.1	93.418	471	29	2	1	469	1	471	0	889	100	469	472	BMF3	BUB1/MAD3 family protein 3	Nucleus	protein_coding	Mad3/BUB1 homology region 1
LOC9309280	29	3	2009869	2012315	0.144138593853964	-0.00529028899062261	0.163401360544218	0.0764636366517848	21.8320749503688	3.57605868104618	3.4707225304263	3.47028483264302	XP_020875963.1	AT5G05520.1	AT5G05520.1	0	GO:0005739; GO:0005886; GO:0009527; GO:0019867	AT5G05520.1	N0.HOG0004784	AT5G05520.1	OG0001540	AT3G11070.1, AT5G05520.1	AT5G05520.1	524	525	100	99	524	94.466	996	AT5G05520.1	94.466	524	29	0	1	524	1	524	0	1000	100	524	525			Nucleus	protein_coding	Outer membrane OMP85 family protein
LOC9307236	21	3	2012384	2013224	0.122745098039216	-0.00486450086842284	0.145567827810819	0.051865614703782	5.37887955351153	1.26886851755716	3.46969281592108	3.46960154427255	XP_002871166.1	AT5G05530.1	AT5G05530.1	0	GO:0046872; GO:0016567; GO:0061630	AT5G05530.1	N0.HOG0026120	AT5G05530.1	OG0019969	AT5G05530.1	AT5G05530.1	199	200	100	99	199	93.97	390	AT5G05530.1	93.97	199	12	0	1	199	1	199	6.7e-141	390	100	199	200			Nucleus	protein_coding	RING/U-box superfamily protein
LOC9307237	52	3	2013309	2015910	0.168728849407783	-0.021302605714709	0.231180223285486	0.0694684496144817	25.1537103945308	4.62534577542078	3.46916179723005	3.4686216725937	XP_020875970.1	AT5G05540.1	AT5G05540.1	0	GO:0003676; GO:0004527; GO:0005634	AT5G05540.1	N0.HOG0002600	AT3G50100.1, AT3G50090.1, AT5G05540.1	OG0000569	AT3G50090.1, AT3G50100.1, AT5G05540.1, AT5G67240.1	AT5G05540.1	464	467	100	99	465	91.828	853	AT5G05540.1	91.828	465	37	1	1	464	1	465	0	853	100	464	467	SDN2	small RNA degrading nuclease 2	Cytoplasm	protein_coding	small RNA degrading nuclease 2
LOC9307238	51	3	2016013	2017683	0.132417702201875	-0.0138166777738851	0.132417702201875	0.0573822015330529	7.17901311954525	2.10949776693365	3.46813795961154	3.46790757577581	XP_002873212.1	AT5G05550.2	AT5G05550.2	0	GO:0003677; GO:0005634; GO:0005654; GO:0009873; GO:0010468;GO:0003700; GO:0006355; GO:0000976	AT5G05550.2	N0.HOG0006578	AT3G11100.1, AT5G05550.2	OG0002478	AT3G11100.1, AT5G05550.2	AT5G05550.2	247	250	98	96	241	92.116	420	AT5G05550.2	92.116	241	17	1	3	243	4	242	7.04e-151	420	98	247	250	ENAP2, VFP5	EIN2 nuclear associated protein 2, VFP5	Nucleus	protein_coding	sequence-specific DNA binding transcription factors
LOC9309281	117	3	2021363	2036076	0.452977367611514	-0.0689065204428848	0.452977367611514	0.128652323764882	179.657912745571	30.2467858058554	3.46585688801703	3.46209642321306	XP_020875907.1	NA	NA	0	NA	NA	NA	NA	NA	NA	NA	NA	NA	NA	NA	NA	NA	NA	NA	NA	NA	NA	NA	NA	NA	NA	NA	NA	NA	NA	NA	NA	NA	NA	NA	NA	NA
LOC9307240	44	3	2036733	2044216	0.355670995670996	-0.101050732744926	0.359337035751475	0.203952805125037	120.445425064273	39.3686398311205	3.4593809786522	3.45842208253979	XP_020875912.1	AT5G05570.1	AT5G05570.1	0	GO:0000149; GO:0003676; GO:0005770; GO:0005802; GO:0005886; GO:0006887; GO:0008168; GO:0009555; GO:0032259;GO:0003676; GO:0005515; GO:0005096; GO:0005737; GO:0006893; GO:0019905; GO:0045159	AT5G05570.1	N0.HOG0016631	AT5G05570.1	OG0010841	AT5G05570.1	AT5G05570.1	1093	1125	100	99	1124	93.06	2142	AT5G05570.1	93.06	1124	47	3	1	1093	1	1124	0	2142	100	1093	1125	TMS	Tomosyn	Nucleus	protein_coding	transducin family protein / WD-40 repeat family protein
LOC9307241	52	3	2044342	2046818	0.169353164994811	0.0409743397684374	0.169353164994811	0.0585305388925406	19.0443743993057	3.02789793668447	3.45624565959821	3.45561840688748	XP_020875988.1	AT5G05580.1	AT5G05580.1	0	GO:0005886; GO:0006633; GO:0006636; GO:0009507; GO:0009941; GO:0031969; GO:0042389; GO:0102993;GO:0006636; GO:0016020; GO:0016717; GO:0006629; GO:0016491	AT5G05580.1	N0.HOG0025027	AT5G05580.1	OG0018962	AT5G05580.1	AT5G05580.1	435	436	100	99	435	95.632	871	AT5G05580.1	95.632	435	19	0	1	435	1	435	0	871	100	435	436	AtFAD8, FAD8	fatty acid desaturase 8	Chloroplast	protein_coding	fatty acid desaturase 8
LOC9307242	22	3	2046772	2048656	0.108702108702109	0.0239324780379147	0.108702108702109	0.0519851589319483	8.91937348136033	2.03749125479768	3.45526841729567	3.45483721027452	XP_020876017.1	AT1G07780.1, AT5G05590.1, AT1G29410.2	AT1G07780.1	0	GO:0000162; GO:0004640; GO:0006568; GO:0009411; GO:0009507	AT1G07780.1, AT5G05590.1, AT1G29410.2	N0.HOG0014724	AT1G07780.1, AT5G05590.1, AT1G29410.2	OG0009069	AT1G07780.1, AT1G29410.2, AT5G05590.1	AT1G07780.1	275	276	100	99	275	91.273	514	AT1G07780.1	91.273	275	24	0	1	275	1	275	0	514	100	275	276	PAI1, TRP6 (AT1G07780), PAI2 (AT5G05590), PAI3 (AT1G29410)	phosphoribosylanthranilate isomerase 1, TRANSIENT RECEPTOR POTENTIAL 6 (AT1G07780), phosphoribosylanthranilate isomerase 2 (AT5G05590), phosphoribosylanthranilate isomerase 3 (AT1G29410)	Chloroplast (NA), Unknown (AT1G07780.1;AT5G05590.1;AT1G29410.2;NA;NA;NA)	protein_coding	NULL (AT5G05590.1;AT1G29410.2;NA;NA), phosphoribosylanthranilate isomerase 1 (AT1G07780.1), phosphoribosylanthranilate isomerase 2 (NA), phosphoribosylanthranilate isomerase 3 (NA)
LOC9309282	29	3	2059223	2061979	0.142140138591942	-0.0329793678731805	0.163360067539046	0.0856438837041756	17.5280504099666	3.78712262279093	3.44998887415173	3.44952125635662	XP_002871172.1	AT5G05600.1	AT5G05600.1	0	GO:0005506; GO:0005829; GO:0006952; GO:0051213; GO:0097237; GO:0120091; GO:1900150; GO:1900366; GO:2000022;GO:0016491; GO:0046872	AT5G05600.1	N0.HOG0018612	AT5G05600.1	OG0012705	AT5G05600.1	AT5G05600.1	372	372	100	99	372	98.118	756	AT5G05600.1	98.118	372	6	1	1	372	1	371	0	756	100	372	372	JAO2, JOX2	JASMONATE-INDUCED OXYGENASE2, Jasmonic Acid Oxidase 2	Cytoplasm	protein_coding	2-oxoglutarate (2OG) and Fe(II)-dependent oxygenase superfamily protein
LOC9307243	46	3	2066107	2068449	0.260394265232975	-0.00890254635872311	0.28021994622194	0.0963757501422799	30.2125421685246	6.5796873941254	3.44709534700765	3.44669518030168	XP_020876028.1	AT5G05610.1	AT5G05610.1	0	GO:0000976; GO:0005634; GO:0006325; GO:0006355; GO:0035064; GO:0046872; GO:0003712; GO:0042393	AT5G05610.1	N0.HOG0004984	AT5G05610.1, AT3G11200.1	OG0001646	AT3G11200.1, AT5G05610.1	AT5G05610.1	241	242	100	99	241	99.585	499	AT5G05610.1	99.585	241	1	0	1	241	1	241	0	499	100	241	242	AL1	alfin-like 1	Nucleus	protein_coding	alfin-like 1
LOC9309283	26	3	2068590	2071217	0.132397342995169	-0.010848328433082	0.132397342995169	0.0825045251222325	16.6458851301893	6.99378986135668	3.44609417738069	3.44567636948508	XP_002871173.1	AT5G05620.1	AT5G05620.1	0	GO:0000911; GO:0000930; GO:0005525; GO:0005635; GO:0005737; GO:0005739; GO:0005874; GO:0005886; GO:0005938; GO:0007020; GO:0009624; GO:0010103; GO:0031122; GO:0046785; GO:0048366; GO:0048768; GO:0051641; GO:0007017	AT5G05620.1	N0.HOG0008389	AT5G05620.1, AT3G61650.1	OG0003578	AT3G61650.1, AT5G05620.1	AT5G05620.1	474	475	100	99	474	99.578	990	AT5G05620.1	99.578	474	2	0	1	474	1	474	0	990	100	474	475	ATGCP2, GCP2, TUBG2	ARABIDOPSIS THALIANA GAMMA-TUBULIN COMPLEX PROTEIN 2, gamma-tubulin complex protein 2, GAMMA-TUBULIN 2	Mitochondrion	protein_coding	gamma-tubulin complex protein 2
LOC9307244	51	3	2071295	2073887	0.155625402965828	-0.0224992445345903	0.207375478927203	0.0665052578739143	18.3661802691239	3.81717285720765	3.44496581513445	3.44437653789433	XP_002871174.1	AT5G05630.1	AT5G05630.1	0	GO:0005886; GO:0009408; GO:0015203; GO:0015293; GO:0015839; GO:0015846; GO:0016020; GO:0022857; GO:0055085	AT5G05630.1	N0.HOG0013004	AT5G05630.1	OG0007468	AT5G05630.1	AT5G05630.1	488	491	100	99	491	94.094	907	AT5G05630.1	94.094	491	25	2	1	488	1	490	0	907	100	488	491	LAT1, LHR1, PUT3, RMV1	L-Amino acid Transporter1, OWER EXPRESSION OF HEAT RESPONSIVE GENE1, POLYAMINE UPTAKE TRANSPORTER 3, resistant to methyl viologen 1	Cell_membrane	protein_coding	Amino acid permease family protein
LOC9307245	1	3	2074351	2075567	0.0591954022988506	0.0591954022988506	0.0591954022988506	0.0591954022988506	0.558047634545168	0.558047634545168	3.44366240562011	3.44366240562011	XP_002873215.1	AT5G05470.1	AT5G05470.1	0	GO:0003723; GO:0003743; GO:0005829; GO:0005850; GO:0005886; GO:0006413; GO:0033290; GO:0043022; GO:0003676							NA	NA	NA	NA	NA	NA	NA	AT5G05470.1	94.815	135	7	0	1	135	1	135	1.53e-77	233	88	154	345	ATEIF2-A2, EIF2 ALPHA, EIF2-A2	eukaryotic translation initiation factor 2 alpha subunit	Cytoplasm	protein_coding	eukaryotic translation initiation factor 2 alpha subunit
LOC9309284	23	3	2076633	2077734	0.0745862141210978	-0.0478079177518773	0.140208647561589	0.061790335777616	8.41550312317085	2.37391151201853	3.44270489286577	3.44252365844055	XP_020876011.1	AT5G05640.1	AT5G05640.1	0	GO:0003723	AT5G05640.1	N0.HOG0026768	AT5G05640.1	OG0020553	AT5G05640.1	AT5G05640.1	314	324	93	99	322	71.118	436	AT5G05640.1	71.118	322	64	3	22	314	2	323	4.19e-155	436	93	314	324			Unknown	protein_coding	nucleoprotein-related
LOC9307246	82	3	2077867	2082626	0.12040434812712	-0.0176095800782492	0.145317531184891	0.0597107353963669	20.2320912885186	3.12315864723023	3.44220745638445	3.44103200737527	XP_020875926.1	AT5G05660.1	AT5G05660.1	0	GO:0000977; GO:0000981; GO:0005634; GO:0006355; GO:0008270; GO:0009651; GO:0010310; GO:0016020; GO:0016567; GO:0016740; GO:0048511; GO:0003700	AT5G05660.1	N0.HOG0018611	AT5G05660.1	OG0012704	AT5G05660.1	AT5G05660.1	883	884	100	99	883	96.263	1714	AT5G05660.1	96.263	883	33	0	1	883	1	883	0	1714	100	883	884	ATNFXL2, EBI, NFXL2	Arabidopsis NF-X like 2, EARLY BIRD, NFX1-like 2	Nucleus	protein_coding	sequence-specific DNA binding transcription factors;zinc ion binding;sequence-specific DNA binding transcription factors
LOC9309285	53	3	2082758	2085508	0.178240740740741	-0.00553386185026366	0.184593788383927	0.0780770500547997	19.1301427796949	5.18880376957648	3.44015222515024	3.43960879529822	XP_020876024.1	AT5G05670.1	AT5G05670.1	0	GO:0005525; GO:0005783; GO:0016020; GO:0005785; GO:0045047	AT5G05670.1	N0.HOG0005288	AT5G05670.1	OG0001804	AT2G18770.2, AT5G05670.1	AT5G05670.1	260	261	100	99	260	98.077	529	AT5G05670.1	98.077	260	5	0	1	260	1	260	0	529	100	260	261			Cytoplasm	protein_coding	signal recognition particle binding
LOC9309286	63	3	2085592	2090302	0.53804347826087	-0.0195727086506276	0.53804347826087	0.0665472156492268	18.4940274047471	3.05443465948552	3.4389608962608	3.43793919084608	XP_002871176.1	AT5G05680.1	AT5G05680.1	0	GO:0000055; GO:0000056; GO:0005635; GO:0005643; GO:0006611; GO:0009627; GO:0017056; GO:0045087; GO:0051028; GO:0006406; GO:0006606; GO:0006913	AT5G05680.1	N0.HOG0020850	AT5G05680.1	OG0014883	AT5G05680.1	AT5G05680.1	810	811	100	99	810	94.691	1582	AT5G05680.1	94.691	810	43	0	1	810	1	810	0	1582	100	810	811	EMB2789, MOS7	EMBRYO DEFECTIVE 2789, MODIFIER OF SNC1,7	Nucleus	protein_coding	nuclear pore complex protein-related
LOC9309287	49	3	2092521	2096545	0.171225937183384	-0.0189998801942614	0.171225937183384	0.0646357269706502	13.1264833668385	2.9537765260017	3.43606191200764	3.43530305687089	XP_002873219.1	AT5G05690.1	AT5G05690.1	0	GO:0004497; GO:0005506; GO:0009911; GO:0010224; GO:0010268; GO:0010584; GO:0016020; GO:0016132; GO:0016705; GO:0020037; GO:0048657; GO:0007275; GO:0016125; GO:0016491	AT5G05690.1	N0.HOG0014723	AT5G05690.1	OG0009068	AT5G05690.1	AT5G05690.1	472	473	100	99	472	98.941	962	AT5G05690.1	98.941	472	5	0	1	472	1	472	0	962	100	472	473	CBB3, CPD, CYP90, CYP90A, CYP90A1, DWF3	CABBAGE 3, CONSTITUTIVE PHOTOMORPHOGENIC DWARF, CYTOCHROME P450 90A1, DWARF 3	Mitochondrion	protein_coding	Cytochrome P450 superfamily protein
LOC9309288	53	3	2104132	2107118	0.352564102564103	-0.00441365826924015	0.352564102564103	0.0628375363390503	12.3792771409558	2.47212305284635	3.43116982360823	3.4305000961345	XP_020875942.1	NA	NA	0	NA	NA	NA	NA	NA	NA	NA	NA	NA	NA	NA	NA	NA	NA	NA	NA	NA	NA	NA	NA	NA	NA	NA	NA	NA	NA	NA	NA	NA	NA	NA	NA	NA
LOC9309289	17	3	2107694	2108306	0.130642388743872	-0.0013744817297862	0.130642388743872	0.0501173774302069	9.38986689214342	1.48557431467594	3.42968632949431	3.42956832259711	XP_020876050.1	AT5G05710.1	AT5G05710.1	0	GO:0005737	AT5G05710.1	N0.HOG0007895	AT5G05710.1	OG0003259	AT2G29700.1, AT5G05710.1	AT5G05710.1	144	145	100	99	144	97.222	290	AT5G05710.1	97.222	144	4	0	1	144	1	144	4.7e-103	290	100	144	145			Nucleus	protein_coding	Pleckstrin homology (PH) domain superfamily protein
LOC9307248	51	3	2109992	2112251	0.220081135902637	0.0176677972969623	0.220081135902637	0.0621193265267064	8.46117791228623	2.39129730353998	3.42871580363371	3.42822064712104	XP_020875991.1	AT5G08695.1	AT5G08695.1	0	GO:0003723; GO:1990904; GO:0003676	AT5G08695.1	N0.HOG0007958	AT5G08695.1, AT4G19610.1	OG0003298	AT4G19610.1, AT5G08695.1		NA	NA	NA	NA	NA	NA	NA	AT4G19610.1	76.65	394	82	3	7	391	381	773	0	603	93	416	817			Nucleus	protein_coding	RNA-binding (RRM/RBD/RNP motifs) family protein
LOC9307249	36	3	2112337	2115665	0.0963296221418606	-0.00626743383737202	0.106600865008552	0.0411863890152399	7.50163599997122	1.50766383484199	3.42759667649515	3.42697167425889	XP_020875946.1	AT5G05730.2	AT5G05730.2	0	GO:0000162; GO:0004049; GO:0005950; GO:0009507; GO:0009570; GO:0009611; GO:0009723; GO:0009851; GO:0010311; GO:0010600; GO:0046872; GO:0009058	AT5G05730.2	N0.HOG0003516	AT5G05730.2	OG0000927	AT2G29690.1, AT3G55870.3, AT5G05730.2	AT5G05730.2	596	625	100	99	625	93.44	1196	AT5G05730.2	93.44	625	11	2	1	596	1	624	0	1196	100	596	625	AMT1, ASA1, JDL1, TRP5, WEI2	A-METHYL TRYPTOPHAN RESISTANT 1, anthranilate synthase alpha subunit 1, JASMONATE-INDUCED DEFECTIVE LATERAL ROOT 1, TRYPTOPHAN BIOSYNTHESIS 5, WEAK ETHYLENE INSENSITIVE 2	Chloroplast	protein_coding	anthranilate synthase alpha subunit 1
LOC9309290	63	3	2116676	2119836	0.156177156177156	-0.0085486859102132	0.189696941993875	0.0398888523257068	13.4899076687686	1.38087552128524	3.42592260334114	3.42518396796909	XP_020875952.1	NA	NA	0	NA	NA	NA	NA	NA	NA	NA	NA	NA	NA	NA	NA	NA	NA	NA	NA	NA	NA	NA	NA	NA	NA	NA	NA	NA	NA	NA	NA	NA	NA	NA	NA	NA
LOC9309291	33	3	2120601	2122553	0.224014336917563	-0.0185235836340775	0.224014336917563	0.0725627657470986	18.2771764740192	2.62248190240987	3.42426196307101	3.42384182927469	XP_002873223.1	AT5G05760.1	AT5G05760.1	0	GO:0005484; GO:0005768; GO:0005794; GO:0006886; GO:0009504; GO:0016020; GO:0016192; GO:0043231; GO:0000139; GO:0000149; GO:0006888; GO:0006906; GO:0012505; GO:0031201; GO:0048278	AT5G05760.1	N0.HOG0020848	AT5G05760.1	OG0014881	AT5G05760.1	AT5G05760.1	336	337	100	99	336	96.131	669	AT5G05760.1	96.131	336	13	0	1	336	1	336	0	669	100	336	337	ATSED5, ATSYP31, SED5, SYP31	T-SNARE SED 5, syntaxin of plants 31	Unknown	protein_coding	syntaxin of plants 31
LOC110227114	11	3	2121910	2122266	0.0304087736789631	-0.087565650913134	0.173076923076923	0.0930945188547637	18.2771764740192	4.91175324319294	3.42372716638139	3.42367003846328	NA	NA	NA	0	NA	NA	NA	NA	NA	NA	NA	NA	NA	NA	NA	NA	NA	NA	NA	NA	NA	NA	NA	NA	NA	NA	NA	NA	NA	NA	NA	NA	NA	NA	NA	NA	NA
LOC9309292	6	3	2125904	2126959	0.0438175270108043	-0.0463162944824776	0.226515656229181	0.0609221368194123	5.31455254805616	1.21312586992103	3.42205015478403	3.42189623632286	XP_002871179.1	AT5G05770.1	AT5G05770.1	0	GO:0003677; GO:0003700; GO:0005634; GO:0099402	AT5G05770.1	N0.HOG0014722	AT5G05770.1	OG0009067	AT5G05770.1	AT5G05770.1	193	123	63	98	122	88.525	203	AT3G11260.1	62.5	200	43	8	6	193	3	182	9.65e-78	230	97	193	183	WOX5A, WOX7	WUSCHEL related homeobox 5A, WUSCHEL related homeobox 7	Nucleus	protein_coding	WUSCHEL related homeobox 7
LOC9307250	65	3	2127311	2130186	0.137782663316583	-0.0219246820649274	0.171612903225806	0.0683056263921936	14.6427168038376	3.63077439940569	3.42143182234775	3.42093674953735	XP_002871180.1	AT5G05780.1	AT5G05780.1	0	GO:0000502; GO:0005838; GO:0005886; GO:0008237; GO:0009965; GO:0045087;GO:0005838; GO:0005515; GO:0008233; GO:0043161	AT5G05780.1	N0.HOG0005848	AT5G05780.1	OG0002099	AT3G11270.1, AT5G05780.1	AT5G05780.1	308	309	100	99	308	99.351	620	AT5G05780.1	99.351	308	2	0	1	308	1	308	0	620	100	308	309	AE3, ATHMOV34, RPN8A	ASYMMETRIC LEAVES ENHANCER 3, RP non-ATPase subunit 8A	Unknown	protein_coding	RP non-ATPase subunit 8A
LOC9307251	19	3	2133482	2135148	0.128603919994648	-0.015876711435953	0.172366621067031	0.0873385198281302	15.1140788269743	5.01490104468736	3.41884263397916	3.41853535676032	XP_002873224.1	AT5G05790.1	AT5G05790.1	0	GO:0000976; GO:0003700; GO:0005634; GO:0006355; GO:0003677	AT5G05790.1	N0.HOG0020847	AT5G05790.1	OG0014880	AT5G05790.1	AT5G05790.1	272	278	99	97	271	95.941	550	AT5G05790.1	95.941	271	11	0	1	271	1	271	0	550	99	272	278			Nucleus	protein_coding	Duplicated homeodomain-like superfamily protein
LOC110227095	43	3	2136823	2140085	0.17591325402674	-0.00807176138339184	0.222414989590562	0.0589723654798728	20.6077499965346	2.7596243892968	3.41746492382583	3.4168489733835	XP_020875983.1	NA	NA	0	NA	NA	NA	NA	NA	NA	NA	NA	NA	NA	NA	NA	NA	NA	NA	NA	NA	NA	NA	NA	NA	NA	NA	NA	NA	NA	NA	NA	NA	NA	NA	NA	NA
LOC9309293	14	3	2140941	2142731	0.0935044525929806	-0.0570953753841558	0.204897572731968	0.0844983845652487	14.4538435290719	4.4159827133235	3.41569136337556	3.4154614151914	XP_002871181.2	AT5G05810.1	AT5G05810.1	0	GO:0016020; GO:0016567; GO:0016740; GO:0046872	AT5G05810.1	N0.HOG0020846	AT5G05810.1	OG0014879	AT5G05810.1	AT5G05810.1	406	408	96	99	390	93.612	676	AT5G05810.1	94.615	390	20	1	18	406	18	407	0	676	96	406	408	ATL43	NULL	Nucleus	protein_coding	RING/U-box superfamily protein
LOC9307252	40	3	2147455	2150047	0.359398496240601	0.00999725347247967	0.359398496240601	0.102277744119148	14.076794387849	4.10212687150693	3.41299932948973	3.4124041792726	XP_020876014.1	AT5G05820.1	AT5G05820.1	0	GO:0005794; GO:0016020	AT5G05820.1	N0.HOG0006171	AT5G05820.1	OG0002256	AT3G11320.1, AT5G05820.1	AT5G05820.1	308	310	100	99	308	97.727	603	AT5G05820.1	97.727	308	7	0	1	308	1	308	0	603	100	308	310	UUAT3	UDP-uronic acid transporter 3	Cell_membrane	protein_coding	Nucleotide-sugar transporter family protein
LOC9309295	26	3	2152242	2153696	0.170920450108267	0.0202361410457012	0.170920450108267	0.0445158467227168	11.3889058171272	1.67403691986197	3.41097054424566	3.410754487933	XP_002871182.1	AT5G05830.1	AT5G05830.1	0	GO:0008270; GO:0016020	AT5G05830.1	N0.HOG0013003	AT5G05830.1	OG0007467	AT5G05830.1	AT5G05830.1	208	205	100	99	208	93.269	386	AT5G05830.1	93.269	208	10	2	1	208	1	204	5.86e-139	386	100	208	205			Nucleus	protein_coding	RING/FYVE/PHD zinc finger superfamily protein
LOC9307253	63	3	2153720	2157423	0.333333333333333	0.006005875651332	0.333333333333333	0.0620309968291576	11.5945502578838	2.04151870005827	3.41032954381784	3.40956686784804	XP_002873227.1	AT5G05840.1	AT5G05840.1	0		AT5G05840.1	N0.HOG0018610	AT5G05840.1	OG0012703	AT5G05840.1	AT5G05840.1	432	440	100	98	432	98.611	889	AT5G05840.1	98.611	432	6	0	1	432	1	432	0	889	100	432	440	BDR6	Boundary of ROP domain6	Nucleus	protein_coding	Protein of unknown function (DUF620)
LOC9309296	58	3	2160994	2163482	0.14005016722408	-0.0192278353712003	0.195167845852777	0.0598777929543931	13.5584424716285	2.02291720236843	3.40732057782788	3.40676970655037	XP_020875967.1	AT5G05850.1	AT5G05850.1	0	GO:0009555; GO:0055046; GO:0005515; GO:0005737	AT5G05850.1	N0.HOG0023198	AT5G05850.1	OG0017197	AT5G05850.1	AT5G05850.1	541	507	94	99	506	97.233	998	AT5G05850.1	97.233	506	14	0	36	541	1	506	0	998	94	541	507	PIRL1	plant intracellular ras group-related LRR 1	Cell_membrane	protein_coding	plant intracellular ras group-related LRR 1
LOC9309297	49	3	2164374	2166450	0.200716845878136	0.0207200112198574	0.200716845878136	0.0547126296925956	5.55384378606001	1.39726301342222	3.40583918260207	3.40539405555251	XP_020875974.1	AT5G05860.1	AT5G05860.1	0	GO:0009690; GO:0042631; GO:0047807; GO:0048316; GO:0080062; GO:1900000; GO:1901527; GO:0008194; GO:0080043; GO:0080044	AT5G05860.1	N0.HOG0025026	AT5G05860.1	OG0018961	AT5G05860.1	AT5G05860.1	454	451	100	99	454	91.63	834	AT5G05860.1	91.63	454	34	1	1	454	1	450	0	834	100	454	451	UGT76C2	UDP-glucosyl transferase 76C2	Unknown	protein_coding	UDP-glucosyl transferase 76C2
LOC9307255	25	3	2168595	2171985	0.176470588235294	0.0222722125921318	0.176470588235294	0.0598496315589206	9.10179344258486	2.19117684968783	3.40411893390971	3.4037432833119	XP_020875971.1	AT5G05870.1	AT5G05870.1	0	GO:0047807; GO:0080062; GO:0008194; GO:0080043; GO:0080044	AT5G05870.1	N0.HOG0002715	AT5G05870.1	OG0000617	AT5G05870.1, AT5G05880.1, AT5G05890.1, AT5G05900.1	AT5G05870.1	459	465	99	98	456	92.763	844	AT5G05870.1	92.763	456	33	0	1	456	1	456	0	844	99	459	465	UGT76C1	UDP-glucosyl transferase 76C1	Unknown	protein_coding	UDP-glucosyl transferase 76C1
LOC9307256	27	3	2173381	2175161	0.157441960305142	0.00344959091037307	0.157441960305142	0.085839699494608	13.9745221680802	4.44090903743398	3.4019969580337	3.40175989250886	XP_020875972.1	AT5G05890.1	AT5G05890.1	0	GO:0005829; GO:0050139; GO:0008194; GO:0080043; GO:0080044	AT5G05890.1	N0.HOG0002716	AT5G05900.1, AT5G05880.1, AT5G05890.1	OG0000617	AT5G05870.1, AT5G05880.1, AT5G05890.1, AT5G05900.1	AT5G05890.1	455	456	100	99	455	93.846	846	AT5G05890.1	93.846	455	28	0	1	455	1	455	0	847	100	455	456	UGT76C5	UDP-glucosyl transferase 76C5	Unknown	protein_coding	UDP-Glycosyltransferase superfamily protein
LOC110227093	10	3	2175253	2177428	0.248538011695906	0.0271866536666273	0.300653594771242	0.0983313371145214	4.31053673348475	1.1740741603892	3.40131733806471	3.40109880183502	XP_020875973.1	AT5G05880.1	AT5G05880.1	0	GO:0005829; GO:0050139; GO:0080043; GO:0080044; GO:0008194	AT5G05880.1	N0.HOG0002716	AT5G05900.1, AT5G05880.1, AT5G05890.1	OG0000617	AT5G05870.1, AT5G05880.1, AT5G05890.1, AT5G05900.1	AT5G05880.1	455	452	100	99	455	85.714	801	AT5G05880.1	85.714	455	61	1	1	455	1	451	0	801	100	455	452	UGT76C4	UDP-glucosyl transferase 76C4	Mitochondrion	protein_coding	UDP-Glycosyltransferase superfamily protein
LOC9307257	45	3	2177740	2179930	0.267741935483871	0.0148321301516773	0.267741935483871	0.0666963533410591	10.5838538846671	2.40157197868951	3.40028846311474	3.39986123210849	XP_002871187.1	AT5G05900.1	AT5G05900.1	0	GO:0035251; GO:0080043; GO:0080044; GO:0008194	AT5G05900.1	N0.HOG0002716	AT5G05900.1, AT5G05880.1, AT5G05890.1	OG0000617	AT5G05870.1, AT5G05880.1, AT5G05890.1, AT5G05900.1	AT5G05900.1	451	451	100	99	451	89.579	835	AT5G05900.1	89.579	451	46	1	1	451	1	450	0	835	100	451	451			Unknown	protein_coding	UDP-Glycosyltransferase superfamily protein
LOC9307258	9	3	2180026	2180882	0.0901831167844389	-0.00788418024038024	0.124232804232804	0.0591294152793118	7.60224946569639	2.87439824761231	3.39917857108384	3.39909130398055	XP_020876045.1	AT5G05910.1	AT5G05910.1	0	GO:0016020; GO:0008270	AT5G05910.1	N0.HOG0026769	AT5G05910.1	OG0020554	AT5G05910.1	AT5G05910.1	162	152	94	99	158	78.481	208	AT5G05910.1	78.481	158	22	4	1	153	1	151	3.87e-70	208	94	162	152	ATL98	Arabidopsis Toxicos en Levadura 98	Cytoplasm	protein_coding	RING/U-box superfamily protein
LOC9307259	67	3	2180941	2183336	0.184808502840388	-0.0205549944666697	0.184808502840388	0.0654861778507649	12.8735476570897	3.11398633993526	3.39893929783966	3.39848041198079	XP_020876001.1	AT5G05920.1	AT5G05920.1	0	GO:0008612; GO:0009553; GO:0034038; GO:0005737	AT5G05920.1	N0.HOG0018608	AT5G05920.1	OG0012701	AT5G05920.1	AT5G05920.1	367	369	99	99	366	97.268	750	AT5G05920.1	97.268	366	10	0	2	367	3	368	0	750	99	367	369	DHS, EDA22	deoxyhypusine synthase, embryo sac development arrest 22	Nucleus	protein_coding	deoxyhypusine synthase
LOC9309298	58	3	2183462	2186918	0.115969369643491	-0.0529610774933865	0.215131139801052	0.0763748711007784	30.5390522730423	6.78426899976295	3.39788691534289	3.39724839739307	XP_020876019.1	AT5G05930.1	AT5G05930.1	0	GO:0004383; GO:0006182	AT5G05930.1	N0.HOG0020843	AT5G05930.1	OG0014877	AT5G05930.1	AT5G05930.1	274	275	100	99	274	94.161	535	AT5G05930.1	94.161	274	16	0	1	274	1	274	0	535	100	274	275	ATGC1, GC1	ARABIDOPSIS GUANYLYL CYCLASE 1, guanylyl cyclase 1	Nucleus	protein_coding	guanylyl cyclase 1
LOC9309299	64	3	2195194	2198363	0.150671224881181	-0.0282920377731942	0.251280524121501	0.0659097418730622	21.2645609121196	2.63356523002908	3.39293102074503	3.39230654906105	XP_002871189.1	AT5G05940.1	AT5G05940.1	0	GO:0005085	AT5G05940.1	N0.HOG0018609	AT5G05940.1	OG0012702	AT5G05940.1	AT5G05940.1	609	612	100	99	612	94.608	1155	AT5G05940.1	94.608	612	29	2	1	609	1	611	0	1155	100	609	612	ATROPGEF5, ROPGEF5	ROP GUANINE NUCLEOTIDE EXCHANGE FACTOR 5, ROP (rho of plants) guanine nucleotide exchange factor 5	Nucleus	protein_coding	ROP guanine nucleotide exchange factor 5
LOC9307260	7	3	2198671	2199368	0.0651948051948052	-0.0443072462763453	0.12508986340762	0.067149438388786	6.44210790462549	3.07183783288499	3.39145046507447	3.39136626967727	XP_002871190.1	AT5G05950.1	AT5G05950.1	0	GO:0009793; GO:0016020	AT5G05950.1	N0.HOG0020842	AT5G05950.1	OG0014876	AT5G05950.1	AT5G05950.1	175	176	100	99	175	99.429	349	AT5G05950.1	99.429	175	1	0	1	175	1	175	1.85e-125	349	100	175	176	MEE60	maternal effect embryo arrest 60	Unknown	protein_coding	maternal effect embryo arrest 60
LOC9307261	3	3	2200190	2200802	0.0758581897157857	-0.0224965157850122	0.081089960029932	0.0730686422622027	5.81949726212888	4.42107710429075	3.39079855042849	3.39069528513363	XP_020876054.1	AT5G05960.1	AT5G05960.1	0	GO:0005504; GO:0009627	AT5G05960.1	N0.HOG0020841	AT5G05960.1	OG0014875	AT5G05960.1	AT5G05960.1	116	117	100	99	116	95.69	228	AT5G05960.1	95.69	116	5	0	1	116	1	116	2.86e-79	228	100	116	117			Extracellular	protein_coding	Bifunctional inhibitor/lipid-transfer protein/seed storage 2S albumin superfamily protein
LOC9307262	11	3	2200769	2202527	0.0932149958775886	-0.00572428038257231	0.128353987570243	0.0521069414351408	18.4290730663423	3.49164397623763	3.39057271006819	3.39034896859601	XP_020876053.1	AT5G05965.1	AT5G05965.1	0		AT5G05965.1	N0.HOG0020840	AT5G05965.1	OG0014874	AT5G05965.1	AT5G05965.1	132	132	100	99	134	91.791	169	AT5G05965.1	91.791	134	6	2	1	132	1	131	5.36e-73	213	100	132	132			Nucleus	protein_coding	NULL
LOC9309300	21	3	2205567	2209905	0.0915831244778613	-0.0155524342122073	0.190033783783784	0.0667584238143541	13.1154482834708	2.73281919675849	3.38857288948	3.38786398502457	XP_020875929.1	NA	NA	0	NA	NA	NA	NA	NA	NA	NA	NA	NA	NA	NA	NA	NA	NA	NA	NA	NA	NA	NA	NA	NA	NA	NA	NA	NA	NA	NA	NA	NA	NA	NA	NA	NA
LOC9307263	56	3	2209878	2214961	0.215780445969125	0.00185830116688969	0.215780445969125	0.0516052722126403	11.6137110236785	2.21852283240094	3.3865197571339	3.38520474376673	XP_002873232.1	AT5G05980.1	AT5G05980.1	0	GO:0004326; GO:0005524; GO:0006730; GO:0009507; GO:0009809; GO:0010449; GO:0046872; GO:0046901; GO:0048364; GO:0048767; GO:1904961; GO:0009058; GO:0016881; GO:0009396; GO:0005737; GO:0005739; GO:0005829	AT5G05980.1	N0.HOG0010230	AT5G05980.1	OG0004975	AT5G05980.1	AT5G05980.1	570	572	100	99	571	95.622	1130	AT5G05980.1	95.622	571	24	1	1	570	1	571	0	1130	100	570	572	ATDFB, DFB, FPGS1	DHFS-FPGS homolog B, DHFS-FPGS homolog B, folylpolyglutamate synthetase 1	Unknown	protein_coding	DHFS-FPGS homolog B
LOC9309301	59	3	2215206	2217238	0.192749298010908	0.00823389096925085	0.192749298010908	0.05319027364532	26.0539357606292	3.17982600772274	3.38453966609391	3.38417556236893	XP_020876037.1	AT5G05987.1	AT5G05987.1	0	GO:0005783; GO:0010008; GO:0016192; GO:0016020	AT5G05987.1	N0.HOG0014721	AT5G05987.1	OG0009066	AT5G05987.1	AT5G05987.1	209	210	100	99	209	94.737	412	AT5G05987.1	94.737	209	11	0	1	209	1	209	4.96e-149	412	100	209	210	PRA1.A2	prenylated RAB acceptor 1.A2	Unknown	protein_coding	prenylated RAB acceptor 1.A2
LOC9307264	21	3	2217183	2218355	0.136015325670498	-9.94125690567816e-05	0.136015325670498	0.0600783579180951	10.1744932541823	1.84884392424642	3.38371396351268	3.38347399063913	XP_002873233.1	AT5G05990.1	AT5G05990.1	0	GO:0005759	AT5G05990.1	N0.HOG0014720	AT5G05990.1	OG0009065	AT5G05990.1	AT5G05990.1	259	260	99	99	258	94.574	455	AT5G05990.1	94.574	258	14	0	1	258	1	258	1.83e-164	455	99	259	260			Mitochondrion	protein_coding	Mitochondrial glycoprotein family protein
LOC9309302	20	3	2218680	2220384	0.127974854063763	0.0102879794543912	0.128005367726544	0.0539469482641093	7.49449031376942	1.6073722172617	3.3830582708681	3.38287562562505	XP_020876016.1	AT5G06000.1	AT5G06000.1	0	GO:0001732; GO:0003723; GO:0003743; GO:0005852; GO:0005886; GO:0016282; GO:0033290; GO:0003676; GO:0005737	AT5G06000.1	N0.HOG0006410	AT3G11400.2, AT5G06000.1	OG0002385	AT3G11400.2, AT5G06000.1	AT5G06000.1	289	309	99	92	287	89.199	518	AT5G06000.1	89.199	287	29	1	1	287	1	285	0	518	99	289	309	ATEIF3G2, EIF3G2	ARABIDOPSIS THALIANA EUKARYOTIC TRANSLATION INITIATION FACTOR 3G2, eukaryotic translation initiation factor 3G2	Nucleus	protein_coding	eukaryotic translation initiation factor 3G2
LOC9307265	5	3	2220478	2221184	0.0488356693521687	-0.0293132030330273	0.159461815012529	0.0533408086281941	18.0727555462093	4.31224308275374	3.38228797893289	3.38218093563945	XP_002871195.1	AT5G06010.1	AT5G06010.1	0		AT5G06010.1	N0.HOG0026999	AT5G06010.1	OG0020760	AT5G06010.1	AT5G06010.1	109	108	100	99	109	88.073	162	AT5G06010.1	88.073	109	11	1	1	109	1	107	1.24e-53	162	100	109	108			Nucleus	protein_coding	NULL
LOC9307266	121	3	2224442	2234456	0.187953555878084	0.00290050533971451	0.410138248847926	0.0551419980636094	14.6376942113284	2.5016393007569	3.38067603286684	3.37832615590403	XP_020875934.1	AT5G06050.1	AT5G06050.1	0	GO:0000139; GO:0008168; GO:0032259; GO:0005737; GO:0005768; GO:0005802	AT5G06050.1	N0.HOG0018454	AT5G06050.1	OG0012556	AT5G06050.1	AT5G06050.1	681	683	100	99	682	95.894	1369	AT5G06050.1	95.894	682	27	1	1	681	1	682	0	1369	100	681	683			Extracellular	protein_coding	Putative methyltransferase family protein
LOC9307267	21	3	2234465	2236425	0.138000112860448	-0.0249889106754779	0.138000112860448	0.0555972108309819	8.39747075120765	2.52974617541398	3.37644383488822	3.37600754601375	XP_002873234.1	AT5G06060.1	AT5G06060.1	0	GO:0005886; GO:0016491	AT5G06060.1	N0.HOG0004161	AT2G29260.1, AT5G06060.1	OG0001237	AT2G29260.1, AT5G06060.1	AT5G06060.1	262	265	100	99	262	96.183	521	AT5G06060.1	96.183	262	10	0	1	262	1	262	0	521	100	262	265			Unknown	protein_coding	NAD(P)-binding Rossmann-fold superfamily protein
LOC9309303	26	3	2238751	2240865	0.141688199827735	-0.00100591197390701	0.160205935796487	0.0637918999047764	9.46024217154651	2.90738229076368	3.37466271844076	3.3743051970697	XP_020876035.1	AT5G06070.1	AT5G06070.1	0	GO:0003700; GO:0005634; GO:0006355; GO:0009409; GO:0030154; GO:0046872; GO:0048441	AT5G06070.1	N0.HOG0014718	AT5G06070.1	OG0009063	AT5G06070.1	AT5G06070.1	226	227	100	99	226	95.133	451	AT5G06070.1	95.133	226	11	0	1	226	1	226	7.88e-164	451	100	226	227	RAB, RBE	RABBIT EARS	Nucleus	protein_coding	C2H2 and C2HC zinc fingers superfamily protein
LOC9309304	21	3	2241844	2243370	0.21997893258427	-0.00149687107398813	0.21997893258427	0.0618647542870193	21.7636428174071	3.40040608021612	3.37331145427758	3.37304283657873	XP_002873236.1	AT5G06080.1	AT5G06080.1	0	GO:0005634; GO:0009755; GO:0045893	AT5G06080.1	N0.HOG0020838	AT5G06080.1	OG0014872	AT5G06080.1	AT5G06080.1	182	178	97	99	177	94.35	354	AT5G06080.1	94.35	177	10	0	1	177	1	177	2.77e-127	354	97	182	178	LBD33	LOB domain-containing protein 33	Nucleus	protein_coding	LOB domain-containing protein 33
LOC9309305	39	3	2248104	2250694	0.151263191557403	0.00344823548412488	0.155980861244019	0.0529063950528078	13.0161570733967	2.76150327069554	3.37071638902229	3.37012879722413	XP_002871197.1	AT5G06090.1	AT5G06090.1	0	GO:0004366; GO:0016020; GO:0016024; GO:0090447; GO:0010143; GO:0016791; GO:0016746	AT5G06090.1	N0.HOG0020837	AT5G06090.1	OG0014871	AT5G06090.1	AT5G06090.1	499	501	100	99	500	96.6	989	AT5G06090.1	96.6	500	16	1	1	499	1	500	0	989	100	499	501	ATGPAT7, GPAT7	GLYCEROL-3-PHOSPHATE sn-2-ACYLTRANSFERASE 7, GLYCEROL-3-PHOSPHATE sn-2-ACYLTRANSFERASE 7	Unknown	protein_coding	glycerol-3-phosphate acyltransferase 7
LOC9307268	26	3	2252032	2254812	0.111797389146618	-0.0266993125597684	0.134756148862776	0.0702423975203262	9.50825212867824	2.64344342992025	3.36908093540944	3.36882934330661	XP_020875964.1	AT5G06100.2	AT5G06100.2	0	GO:0003700; GO:0005634; GO:0008285; GO:0009723; GO:0009735; GO:0009739; GO:0009740; GO:0009789; GO:0043068; GO:0043565; GO:0045893; GO:0045926; GO:0048235; GO:0048653; GO:0048655; GO:1990019; GO:0006355	AT5G06100.2	N0.HOG0025740	AT5G06100.2	OG0019623	AT5G06100.2	AT5G06100.2	519	521	100	99	520	93.462	1018	AT5G06100.2	93.462	520	33	1	1	519	1	520	0	1018	100	519	521	ATMYB33, MYB33	myb domain protein 33	Nucleus	protein_coding	myb domain protein 33
LOC9307269	8	3	2254940	2258225	0.0698412698412698	-0.0557350004984279	0.138584752635848	0.0803792260047223	7.45823805315985	3.68009085455242	3.36767426060024	3.366820852696	XP_020879359.1	AT5G06110.1	AT5G06110.1	0	GO:0003677; GO:0005886; GO:0006450; GO:0009793; GO:0009909; GO:0030544; GO:0042393; GO:0043022; GO:0043130; GO:0048366; GO:0051083; GO:0051301; GO:1902182; GO:0005829	AT5G06110.1	N0.HOG0004983	AT5G06110.1	OG0001645	AT3G11450.1, AT5G06110.1		NA	NA	NA	NA	NA	NA	NA	AT5G06110.1	84.451	328	30	3	249	570	351	663	9.63e-178	517	56	570	664	AtGlsA1, AtGlsA2, ZRF1b	gonidialess A/Zuotin related factor A1, gonidialess A/Zuotin related factor A2, ZUOTIN-RELATED FACTOR 1b	Nucleus	protein_coding	DnaJ domain ;Myb-like DNA-binding domain
LOC9309306	12	3	2258293	2267805	0.111323459149546	0.0391204552021903	0.111323459149546	0.0511822574454795	14.6674706730795	3.7626756336915	3.36645942416401	3.36561049388773	XP_020875914.1	AT5G06120.1	AT5G06120.1	0	GO:0005049; GO:0005634; GO:0006886; GO:0031267; GO:0005643; GO:0005737; GO:0006611; GO:0051169	AT5G06120.1	N0.HOG0016630	AT5G06120.1	OG0010840	AT5G06120.1	AT5G06120.1	1060	1067	100	99	1067	98.219	2161	AT5G06120.1	98.219	1067	11	2	1	1060	1	1066	0	2161	100	1060	1067	XPO7	NULL	Mitochondrion	protein_coding	ARM repeat superfamily protein (AT5G06120.1), NULL (NA)
LOC9307270	4	3	2267883	2269273	0.152777777777778	0.0925658083746319	0.152777777777778	0.0961372369460605	0.638737674528107	0.419139994288649	3.36222680640776	3.36213550477511	NA	NA	NA	0	NA	NA	NA	NA	NA	NA	NA	NA	NA	NA	NA	NA	NA	NA	NA	NA	NA	NA	NA	NA	NA	NA	NA	NA	NA	NA	NA	NA	NA	NA	NA	NA	NA
LOC9309307	26	3	2269813	2272077	0.153737627088279	0.00627460821315642	0.192232125742764	0.0836597572981232	22.1966918185322	5.37743307386678	3.3615988190862	3.36102097904509	XP_020876010.1	AT5G06130.2	AT5G06130.2	0	GO:0009507; GO:0016020;GO:0031969; GO:0046872; GO:0050821; GO:1904143; GO:0031969	AT5G06130.2	N0.HOG0016629	AT5G06130.2	OG0010839	AT5G06130.2	AT5G06130.2	314	316	100	99	315	97.46	622	AT5G06130.2	97.46	315	7	1	1	314	1	315	0	622	100	314	316	AtOR-like	Arabidopsis thaliana orange-like	Unknown	protein_coding	chaperone protein dnaJ-related
LOC9309308	73	3	2272094	2275206	0.175671852899576	0.0172343952023811	0.175671852899576	0.0535345084089913	12.2104168756582	2.41628871071428	3.36058463635297	3.35990824234625	XP_002873240.1	AT5G06140.1	AT5G06140.1	0	GO:0005768; GO:0005771; GO:0005794; GO:0005886; GO:0006623; GO:0006896; GO:0008333; GO:0009958; GO:0010008; GO:0016020; GO:0030904; GO:0035091; GO:0043231; GO:0048364	AT5G06140.1	N0.HOG0018607	AT5G06140.1	OG0012700	AT5G06140.1	AT5G06140.1	403	403	100	99	403	98.015	808	AT5G06140.1	98.015	403	7	1	1	403	1	402	0	808	100	403	403	ATSNX1, SNX1	ARABIDOPSIS THALIANA SORTING NEXIN 1, sorting nexin 1	Chloroplast	protein_coding	sorting nexin 1
LOC9309309	54	3	2275688	2278055	0.240927419354839	-0.00907406844572732	0.240927419354839	0.0579212371361264	18.34793007655	2.66263495715639	3.35912716845159	3.35868185435825	XP_020875984.1	AT5G06150.1	AT5G06150.1	0	GO:0005737; GO:0010332; GO:0016538; GO:0044772; GO:0051301;GO:0016538	AT5G06150.1	N0.HOG0010887	AT5G06150.1	OG0005532	AT5G06150.1	AT5G06150.1	445	446	100	99	445	97.303	903	AT5G06150.1	97.303	445	12	0	1	445	1	445	0	903	100	445	446	CYC1BAT, CYCB1;2	cyclin B 1;2	Nucleus	protein_coding	Cyclin family protein
LOC9309311	36	3	2284539	2288135	0.158193810248605	-0.0162042492978842	0.158193810248605	0.0606130822938425	11.1570389105746	2.54296071296469	3.35539156739904	3.35475062527366	XP_002871200.1	AT5G43610.1	AT5G43610.1	0	GO:0005886; GO:0005985; GO:0008515; GO:0015293; GO:0022857; GO:0055085; GO:0015770; GO:0005773; GO:0008506; GO:0016020		N0.HOG0002227	AT1G71880.1, AT1G71890.1, AT5G06170.1, AT1G66570.1, AT2G14670.1, AT5G43610.1	OG0000439	AT1G66570.1, AT1G71880.1, AT1G71890.1, AT2G14670.1, AT5G06170.1, AT5G43610.1	AT5G43610.1	492	493	100	99	492	93.293	892	AT5G43610.1	93.293	492	33	0	1	492	1	492	0	892	100	492	493	ATSUC6, SUC6	sucrose-proton symporter 6, sucrose-proton symporter 6	Unknown	protein_coding	sucrose-proton symporter 6
LOC110227111	1	3	2302988	2303920	0.217391304347826	0.217391304347826	0.217391304347826	0.217391304347826	-Inf	NA	3.34733435573452	3.34733435573452	NA	NA	NA	0	NA	NA	NA	NA	NA	NA	NA	NA	NA	NA	NA	NA	NA	NA	NA	NA	NA	NA	NA	NA	NA	NA	NA	NA	NA	NA	NA	NA	NA	NA	NA	NA	NA
LOC9309312	14	3	2304748	2306109	0.172916666666667	0.00361166014735008	0.172916666666667	0.0741847958224353	4.75561372456282	1.47050878111037	3.34688729256777	3.34670969664981	NA	NA	NA	0	NA	NA	NA	NA	NA	NA	NA	NA	NA	NA	NA	NA	NA	NA	NA	NA	NA	NA	NA	NA	NA	NA	NA	NA	NA	NA	NA	NA	NA	NA	NA	NA	NA
LOC9307272	21	3	2307287	2310362	0.143544382371198	-0.0232179941110476	0.186070686070686	0.0663679339608349	18.0257050247534	4.0154924784845	3.3457857960893	3.34529243744773	XP_020875997.1	NA	NA	0	NA	NA	NA	NA	NA	NA	NA	NA	NA	NA	NA	NA	NA	NA	NA	NA	NA	NA	NA	NA	NA	NA	NA	NA	NA	NA	NA	NA	NA	NA	NA	NA	NA
LOC9307273	7	3	2310054	2311206	0.220681699952503	0.0215378505546893	0.220681699952503	0.0818967571050738	20.4123795170379	5.25219407845711	3.34469437427374	3.34449462009421	XP_002871203.1	AT5G06200.1	AT5G06200.1	0	GO:0005886; GO:0007043; GO:0042545; GO:0042803; GO:0048226	AT5G06200.1	N0.HOG0004333	AT5G06200.1	OG0001325	AT3G11550.1, AT5G06200.1	AT5G06200.1	202	203	100	99	202	99.01	394	AT5G06200.1	99.01	202	2	0	1	202	1	202	1.89e-142	394	100	202	203	CASP4	Casparian strip membrane domain protein 4	Unknown	protein_coding	Uncharacterised protein family (UPF0497)
LOC9307274	37	3	2311352	2312589	0.164240506329114	0.00126654918280504	0.164240506329114	0.0566701417075842	12.4855300392465	2.57595440642247	3.3441944191267	3.34399289183242	XP_020876049.1	NA	NA	0	NA	NA	NA	NA	NA	NA	NA	NA	NA	NA	NA	NA	NA	NA	NA	NA	NA	NA	NA	NA	NA	NA	NA	NA	NA	NA	NA	NA	NA	NA	NA	NA	NA
LOC9307275	98	3	2312728	2319283	0.207502216312057	-0.0324130304312048	0.207502216312057	0.0674883979725325	16.8299730153055	3.83457560297192	3.34360001401484	3.34233750283446	XP_020875924.1	AT5G06220.2	AT5G06220.2	0	GO:0005743; GO:0009941; GO:0030003	AT5G06220.2	N0.HOG0010228	AT5G06220.2	OG0004973	AT5G06220.2	AT5G06220.2	900	910	100	99	926	88.769	1613	AT5G06220.2	88.769	926	61	9	1	900	1	909	0	1619	100	900	910			Chloroplast	protein_coding	LETM1-like protein
LOC110227097	33	3	2318614	2320643	0.156565656565657	-0.0383477573153786	0.177328782206562	0.0827523495821583	16.1699888305954	4.91151903942677	3.34108470650761	3.34062857360012	XP_020875992.1	AT5G06230.1	AT5G06230.1	0	GO:0016020; GO:0016413; GO:0005794; GO:0016740	AT5G06230.1	N0.HOG0004331	AT5G06230.1	OG0001324	AT3G11570.1, AT5G06230.1	AT5G06230.1	411	414	100	99	413	92.978	775	AT5G06230.1	92.978	413	27	1	1	411	1	413	0	775	100	411	414	TBL9	TRICHOME BIREFRINGENCE-LIKE 9	Unknown	protein_coding	TRICHOME BIREFRINGENCE-LIKE 9
LOC9307276	44	3	2321365	2322898	0.176227699369354	-0.000738358603701298	0.176227699369354	0.0702615759035506	20.5294954561915	3.86796443097835	3.33998992647108	3.33967807940041	XP_002871206.1	AT5G06240.1	AT5G06240.1	0		AT5G06240.1	N0.HOG0016628	AT5G06240.1	OG0010838	AT5G06240.1	AT5G06240.1	162	163	100	99	162	96.296	320	AT5G06240.1	96.296	162	6	0	1	162	1	162	3.72e-114	320	100	162	163	emb2735	embryo defective 2735	Unknown	protein_coding	embryo defective 2735
LOC9307277	16	3	2326521	2329804	0.0278202809848379	-0.0538381292889348	0.158330668372242	0.0581564004526486	19.8091932654055	3.74484414447682	3.3377151515409	3.33727236485866	XP_020876022.1	NA	NA	0	NA	NA	NA	NA	NA	NA	NA	NA	NA	NA	NA	NA	NA	NA	NA	NA	NA	NA	NA	NA	NA	NA	NA	NA	NA	NA	NA	NA	NA	NA	NA	NA	NA
LOC9309313	7	3	2340325	2340991	0.0778345321241183	0.000460742789300441	0.0794143356643357	0.0434220800215398	2.84607485394378	0.980887131370598	3.33201289233225	3.33193631290046	XP_002871207.1	AT5G04800.1	AT5G04800.1	0	GO:0003729; GO:0003735; GO:0005840; GO:0005886; GO:0006412; GO:1990904							NA	NA	NA	NA	NA	NA	NA	AT5G04800.1	89.362	141	13	2	1	139	1	141	1.79e-86	248	100	139	142	eS17w	Ribosomal Protein eS17w	Cytoplasm	protein_coding	Ribosomal S17 family protein
LOC9307278	60	3	2341084	2343444	0.113716676031716	-0.0235502706470634	0.194261305599406	0.0630254264694535	30.8004878206928	4.51891577421191	3.3317035162253	3.33118187956411	XP_002873245.1	AT4G34070.1, AT5G06260.1	AT5G06260.1	0	GO:0005509	AT4G34070.1, AT5G06260.1	N0.HOG0016627	AT4G34070.1, AT5G06260.1	OG0010837	AT4G34070.1, AT5G06260.1	AT5G06260.1	425	425	100	99	425	94.588	837	AT5G06260.1	94.588	425	22	1	1	425	1	424	0	837	100	425	425	OXR3 (AT5G06260), OXR6 (AT4G34070)	oxidation resistance 3 (AT5G06260), oxidation resistance 6 (AT4G34070)	Chloroplast (AT5G06260.1), Unknown (AT4G34070.1)	protein_coding	Calcium-binding EF-hand family protein (AT4G34070.1), TLD-domain containing nucleolar protein (AT5G06260.1)
LOC9309314	36	3	2343457	2345969	0.137463496036713	-0.00259067347503297	0.191894127377998	0.0538836437586947	12.4748547969226	2.11622056132791	3.33071913770319	3.33029241043009	XP_020876057.1	NA	NA	0	NA	NA	NA	NA	NA	NA	NA	NA	NA	NA	NA	NA	NA	NA	NA	NA	NA	NA	NA	NA	NA	NA	NA	NA	NA	NA	NA	NA	NA	NA	NA	NA	NA
LOC9307279	18	3	2351552	2352690	0.209848484848485	0.0642649256910107	0.209848484848485	0.0933825875256611	11.1764771681494	4.40929228726309	3.32732397630157	3.32701688565057	XP_020879508.1	AT5G06270.1	AT5G06270.1	0	GO:0005634; GO:0045892; GO:0080147	AT5G06270.1	N0.HOG0010885	AT5G06270.1	OG0005531	AT5G06270.1	AT5G06270.1	120	123	100	99	122	97.541	232	AT5G06270.1	97.541	122	1	1	1	120	1	122	7.72e-81	232	100	120	123	GIR1	NULL	Nucleus	protein_coding	NULL
LOC110227524	54	3	2357469	2359099	0.148128473357306	0.03217517762468	0.148128473357306	0.0622870901621203	7.55491159890932	1.92664996587922	3.32341355946831	3.32242021691707	XP_020877583.1	AT5G42560.1	AT5G42560.1	0	GO:0016020							NA	NA	NA	NA	NA	NA	NA	AT5G42560.1	45.614	171	79	2	1	157	1	171	3.9e-53	170	94	167	297			Unknown	protein_coding	Abscisic acid-responsive (TB2/DP1, HVA22) family protein
LOC9307280	16	3	2359052	2359674	0.122370266479663	-0.00564627938332622	0.122370266479663	0.0556117112701351	4.4863647237033	1.38089591145257	3.32125311321985	3.32101132662523	XP_020877584.1	AT5G06280.1	AT5G06280.1	0		AT5G06280.1	N0.HOG0014713	AT5G06280.1	OG0009058	AT5G06280.1	AT5G06280.1	155	157	100	99	156	89.103	248	AT5G06280.1	89.103	156	16	1	1	155	1	156	4.18e-96	273	100	155	157			Mitochondrion	protein_coding	NULL
LOC9309315	60	3	2359958	2362102	0.283514492753623	0.0189669663810242	0.283514492753623	0.0762651492320695	21.7934845372328	3.7167282419052	3.32010873767252	3.31864055438963	XP_002871210.2	AT5G06290.1	AT5G06290.1	0	GO:0005886; GO:0009409; GO:0009507; GO:0009570; GO:0010319; GO:0045454; GO:0048046; GO:0051920; GO:0140824;GO:0140824; GO:0006979; GO:0008379; GO:0033554; GO:0042744; GO:0016209; GO:0016491	AT5G06290.1	N0.HOG0006885	AT5G06290.1	OG0002651	AT3G11630.1, AT5G06290.1	AT5G06290.1	266	274	81	88	215	92.531	436	AT5G06290.1	97.674	215	5	0	52	266	59	273	8.4e-157	436	81	266	274	2-Cys Prx B, 2CPB	2-cysteine peroxiredoxin B, 2-CYS PEROXIREDOXIN B	Chloroplast	protein_coding	2-cysteine peroxiredoxin B
LOC9307281	51	3	2362257	2366292	0.136755887084979	-0.0224378134059865	0.159146381687446	0.0555624021653206	14.9580537279114	2.25237657655149	3.31722123062898	3.31542554725677	XP_002873247.1	AT5G06300.1	AT5G06300.1	0	GO:0005634; GO:0005829; GO:0009691; GO:0102682; GO:0016787; GO:0016799	AT5G06300.1	N0.HOG0013002	AT5G06300.1	OG0007466	AT5G06300.1	AT5G06300.1	217	218	100	99	217	99.539	444	AT5G06300.1	99.539	217	1	0	1	217	1	217	1.43e-161	444	100	217	218	LOG7	LONELY GUY 7	Unknown	protein_coding	Putative lysine decarboxylase family protein
LOC9309316	34	3	2368976	2371660	0.107744107744108	-0.0336260574552705	0.190691280439906	0.0759638807575719	12.7359381235155	3.90653273264089	3.30853408533597	3.30709452478303	XP_020876073.1	AT5G06310.1	AT5G06310.1	0	GO:0000723; GO:0000781; GO:0003723; GO:0005634; GO:0016233; GO:0043047; GO:0003677; GO:0000783; GO:0010521; GO:0032210; GO:0051974; GO:0098505	AT5G06310.1	N0.HOG0018605	AT5G06310.1	OG0012698	AT5G06310.1	AT5G06310.1	454	455	99	99	453	92.715	874	AT5G06310.1	92.715	453	32	1	2	454	3	454	0	874	99	454	455	AtPOT1b	protection of telomeres 1b	Nucleus	protein_coding	Nucleic acid-binding, OB-fold-like protein
LOC9307282	20	3	2374973	2375940	0.1021226809293	-0.0211800137528431	0.142982362940926	0.0681517578890597	11.3427041792946	3.58460862466989	3.30076062606885	3.30020632321314	XP_002873248.1	AT5G06320.1	AT5G06320.1	0	GO:0000325; GO:0003729; GO:0005794; GO:0005886; GO:0009506; GO:0009611; GO:0009617; GO:0009751; GO:0042742; GO:0051607; GO:0071456; GO:0098542	AT5G06320.1	N0.HOG0011771	AT5G06320.1	OG0006341	AT5G06320.1	AT5G06320.1	231	232	100	99	231	97.835	467	AT5G06320.1	97.835	231	5	0	1	231	1	231	2.61e-170	467	100	231	232	NHL3	NDR1/HIN1-like 3	Mitochondrion	protein_coding	NDR1/HIN1-like 3
LOC9309318	13	3	2380885	2382025	0.146043111807265	0.00797248191659626	0.146043111807265	0.075184742248338	7.56553872544981	3.07432753455791	3.29293014242564	3.29245291220131	XP_002873250.1	AT5G05657.1, AT5G06330.1	AT5G06330.1	0	GO:0016020; GO:0098542;GO:0098542; GO:0005886; GO:0009506; GO:0098542	AT5G05657.1, AT5G06330.1	N0.HOG0007025	AT5G05657.1, AT5G06330.1	OG0002734	AT3G11660.1, AT5G05657.1, AT5G06330.1	AT5G06330.1	215	208	100	99	215	85.581	332	AT5G06330.1	85.581	215	23	3	1	215	1	207	7.87e-123	346	100	215	208			Unknown	protein_coding	Late embryogenesis abundant (LEA) hydroxyproline-rich glycoprotein family (AT5G06330.1), NULL (AT5G05657.1)
LOC9309320	20	3	2385725	2387523	0.121696728187919	-0.0112838804973089	0.161627779603462	0.0613881700271654	25.0113034760797	4.38811691489496	3.28666523710766	3.28586508143051	XP_020878940.1	AT5G06340.1	AT5G06340.1	0	GO:0009507; GO:0034432; GO:0046872; GO:0016787; GO:0006753; GO:0008893; GO:0019693	AT5G06340.1	N0.HOG0020835	AT5G06340.1	OG0014869	AT5G06340.1	AT5G06340.1	227	228	100	99	227	97.797	461	AT5G06340.1	97.797	227	5	0	1	227	1	227	4.94e-168	461	100	227	228	ATNUDX27, NUDT27, NUDX27	nudix hydrolase homolog 27, nudix hydrolase homolog 27	Chloroplast	protein_coding	nudix hydrolase homolog 27
LOC9309321	36	3	2390685	2396492	0.10663082437276	-0.00347892917647278	0.125722884456509	0.0617004596592748	15.404159557389	3.60452892175738	3.2804119958666	3.27742646017655	XP_020877978.1	AT5G06350.1	AT5G06350.1	0	GO:0005634; GO:0009506	AT5G06350.1	N0.HOG0009350	AT5G27010.1, AT5G06350.1	OG0004239	AT5G06350.1, AT5G27010.1	AT5G06350.1	877	878	100	99	877	93.044	1628	AT5G06350.1	93.044	877	61	0	1	877	1	877	0	1633	100	877	878			Nucleus	protein_coding	ARM repeat superfamily protein
LOC9307284	41	3	2396923	2399047	0.269794721407625	0.0246877026802041	0.269794721407625	0.0872730516793176	21.8967220689899	4.9154108260665	3.27187648357363	3.27075448788122	XP_002871214.1	AT5G06360.1	AT5G06360.1	0	GO:0005730; GO:0005840; GO:0006364; GO:1990904	AT5G06360.1	N0.HOG0011770	AT5G06360.1	OG0006340	AT5G06360.1	AT5G06360.1	260	261	100	99	260	97.692	523	AT5G06360.1	97.692	260	6	0	1	260	1	260	0	523	100	260	261			Nucleus	protein_coding	Ribosomal protein S8e family protein
LOC9307286	12	3	2400199	2401575	0.101559207753898	-0.00513529685649992	0.101559207753898	0.0462928209734778	5.14052986992394	1.5650816616989	3.26733008558946	3.26658023664409	XP_020878846.1	AT5G06370.1	AT5G06370.1	0	GO:0005737; GO:0010288; GO:0015692; GO:0046938; GO:0071284	AT5G06370.1	N0.HOG0018603	AT5G06370.1	OG0012696	AT5G06370.1	AT5G06370.1	259	260	100	99	259	96.911	522	AT5G06370.1	96.911	259	8	0	1	259	1	259	0	522	100	259	260	PSE1	Pb-sensitive1	Unknown	protein_coding	NC domain-containing protein-related
LOC9309322	12	3	2402240	2403180	0.10119816329459	-0.0195491103252971	0.10119816329459	0.042070703335784	4.74651086888755	1.13225318986347	3.26517482337518	3.26473385646694	XP_002871216.1	AT5G06380.1	AT5G06380.1	0		AT5G06380.1	N0.HOG0020262	AT5G06380.1	OG0014302	AT5G06380.1	AT5G06380.1	146	147	97	98	144	92.361	210	AT5G06380.1	92.361	144	8	2	6	146	3	146	3.57e-71	210	97	146	147			Nucleus	protein_coding	NULL
LOC9307287	44	3	2406913	2409965	0.116602316602317	-0.0229530799281516	0.206692693809258	0.0589566813226894	16.3312357519227	2.76775370944964	3.25938555319409	3.25778398117693	XP_020878535.1	AT5G06390.1	AT5G06390.1	0	GO:0000325; GO:0005576	AT5G06390.1	N0.HOG0010884	AT5G06390.1	OG0005530	AT5G06390.1	AT5G06390.1	458	459	100	99	458	96.288	904	AT5G06390.1	96.288	458	17	0	1	458	1	458	0	904	100	458	459	FLA17	FASCICLIN-like arabinogalactan protein 17 precursor	Extracellular	protein_coding	FASCICLIN-like arabinogalactan protein 17 precursor
LOC9307288	17	3	2410194	2413494	0.0956161344930244	-0.00914360516491755	0.104070767012368	0.0468174855641282	8.45823568413126	2.75453597755857	3.2549700520732	3.25258974178646	XP_002871218.1	AT5G06400.1	AT5G06400.1	0	GO:0005739; GO:0005515; GO:0003729; GO:0006396; GO:0007005	AT5G06400.1	N0.HOG0014712	AT5G06400.1	OG0009057	AT5G06400.1	AT5G06400.1	1029	1031	99	99	1030	92.621	1935	AT5G06400.1	92.621	1030	74	2	1	1028	1	1030	0	1935	99	1029	1031			Mitochondrion	protein_coding	Pentatricopeptide repeat (PPR) superfamily protein
LOC9307289	14	3	2413461	2415139	0.169716599190283	-0.00787495026705383	0.183837712005321	0.087050170142527	14.486777447289	3.89464481312126	3.25080079257631	3.24948701019744	XP_002873254.2	AT5G06410.1	AT5G06410.1	0	GO:0001671; GO:0005739; GO:0005829; GO:0016226; GO:0044571; GO:0051087; GO:0051259	AT5G06410.1	N0.HOG0018602	AT5G06410.1	OG0012695	AT5G06410.1	AT5G06410.1	261	253	100	99	261	92.337	499	AT5G06410.1	92.337	261	11	2	1	261	1	252	0	499	100	261	253	HscB	NULL	Mitochondrion	protein_coding	DNAJ heat shock N-terminal domain-containing protein
LOC110227356	8	3	2417491	2419224	0.0264313850650496	-0.0644775876992184	0.195887445887446	0.0749953181527061	6.51679100820868	1.91408587700434	3.24566341469454	3.24506060871895	NA	NA	NA	0	NA	NA	NA	NA	NA	NA	NA	NA	NA	NA	NA	NA	NA	NA	NA	NA	NA	NA	NA	NA	NA	NA	NA	NA	NA	NA	NA	NA	NA	NA	NA	NA	NA
LOC110227355	34	3	2419659	2422088	0.0693775734733448	-0.0169950623426481	0.184660194174757	0.0445135039223967	9.47490760810027	1.67662571642278	3.24285885219803	3.24144757512575	XP_020877007.1	NA	NA	0	NA	NA	NA	NA	NA	NA	NA	NA	NA	NA	NA	NA	NA	NA	NA	NA	NA	NA	NA	NA	NA	NA	NA	NA	NA	NA	NA	NA	NA	NA	NA	NA	NA
LOC9309323	25	3	2421843	2422852	0.131111111111111	0.004047965170457	0.131111111111111	0.0396308029111056	5.35331782709444	1.32351820077819	3.2397963840006	3.23938689713997	XP_002873255.1	AT5G06430.1	AT5G06430.1	0	GO:0009536; GO:0045454	AT5G06430.1	N0.HOG0011769	AT5G06430.1	OG0006339	AT5G06430.1	AT5G06430.1	192	195	100	99	194	92.268	357	AT5G06430.1	92.268	194	13	2	1	192	1	194	4.95e-128	357	100	192	195			Nucleus	protein_coding	Thioredoxin superfamily protein
LOC9309324	39	3	2422957	2425985	0.212454545454545	0.000263064946893552	0.212454545454545	0.0586801327877509	11.1040755415853	1.91500363131142	3.23855739982932	3.23636864077874	XP_002873256.1	AT5G06440.4	AT5G06440.4	0	GO:0005739	AT5G06440.4	N0.HOG0014711	AT5G06440.4	OG0009056	AT5G06440.4	AT5G06440.4	480	487	100	99	488	89.959	862	AT5G06440.4	89.959	488	39	3	1	480	1	486	0	862	100	480	487			Nucleus	protein_coding	NULL
LOC9309325	29	3	2426472	2427949	0.162667191188041	-0.0319102203692527	0.251154865581219	0.0858186014867527	20.6858613815643	3.99613164897373	3.23392935330666	3.23287337448025	XP_020876282.1	AT5G06450.1	AT5G06450.1	0	GO:0000325; GO:0003676; GO:0005737; GO:0008310; GO:0008859; GO:0031047; GO:1905172; GO:2000630; GO:0005634; GO:0008408	AT5G06450.1	N0.HOG0005287	AT5G06450.1	OG0001803	AT3G11770.1, AT5G06450.1	AT5G06450.1	208	207	99	99	205	95.61	399	AT5G06450.1	95.61	205	9	0	1	205	1	205	3.24e-144	399	99	208	207	RICE2	RISC-Interacting Clearing 3?- 5? Exoribonuclease 2	Nucleus	protein_coding	Polynucleotidyl transferase, ribonuclease H-like superfamily protein
LOC9309326	19	3	2428798	2433419	0.120416496529196	-0.00657137148069494	0.135260842237586	0.0456251431700177	12.1903273002141	2.16614541431418	3.23099130192977	3.23011697363713	XP_020876281.1	AT5G06460.1	AT5G06460.1	0	GO:0004839; GO:0004842; GO:0005524; GO:0005634; GO:0016567; GO:0005737; GO:0016925; GO:0019948; GO:0031510; GO:0032446; GO:0008641; GO:0036211	AT5G06460.1	N0.HOG0023195	AT5G06460.1	OG0017194	AT5G06460.1	AT5G06460.1	1079	1078	100	99	1079	96.386	2153	AT5G06460.1	96.386	1079	37	1	1	1079	1	1077	0	2153	100	1079	1078	ATUBA2, UBA 2	ARABIDOPSIS THALIANA UBIQUITIN ACTIVATING ENZYME 2, ubiquitin activating enzyme 2	Unknown	protein_coding	ubiquitin activating enzyme 2
LOC9307290	17	3	2433510	2434542	0.0587085182836609	-0.0220832410629763	0.115049119969719	0.0514445947776607	7.46509487971126	1.91763649340753	3.22490783780842	3.22426379779618	XP_002873258.1	AT5G06470.1	AT5G06470.1	0		AT5G06470.1	N0.HOG0013001	AT5G06470.1	OG0007465	AT5G06470.1	AT5G06470.1	239	240	100	99	239	94.561	466	AT5G06470.1	94.561	239	13	0	1	239	1	239	9.98e-170	466	100	239	240			Mitochondrion	protein_coding	Glutaredoxin family protein
LOC9309327	12	3	2434868	2436848	0.116783216783217	-0.00404850098630292	0.116783216783217	0.047109433943838	13.6177698961848	2.58276482760825	3.22311545798741	3.22207951515521	XP_002873259.1	AT5G06480.1	AT5G06480.1	0	GO:0032366; GO:0032934; GO:0015918	AT5G06480.1	N0.HOG0004329	AT5G06480.1	OG0001323	AT3G11780.2, AT5G06480.1	AT5G06480.1	153	154	100	88	137	87.582	266	AT5G06480.1	87.582	153	19	0	1	153	1	153	8.12e-94	268	100	153	154			Chloroplast	protein_coding	Immunoglobulin E-set superfamily protein
LOC9307813	32	4	6949157	6952748	0.117819067925678	-0.0223711902608787	0.117819067925678	0.0595500827084614	10.647481235232	2.82669355549757	3.22245074339946	3.22193332575002	XP_002871744.1	AT5G16930.1	AT5G16930.1	0	GO:0005524; GO:0005739; GO:0016887; GO:0007005; GO:0008270	AT5G16930.1	N0.HOG0012655	AT5G16930.1	OG0007151	AT5G16930.1	AT5G16930.1	643	645	100	99	643	97.978	1288	AT5G16930.1	97.978	643	13	0	1	643	1	643	0	1288	100	643	645	ATAD3A2, SBA2	ATPase family AAA Domain-containing protein 3A2, SHOT1 Binding ATPase 2	Chloroplast	protein_coding	AAA-type ATPase family protein
LOC9307814	19	4	6952525	6953351	0.833333333333333	0.0141809464499057	0.833333333333333	0.152145624930538	13.7432614143726	2.65406640838045	3.22281133825458	3.22259773953288	XP_020877759.1	AT5G16940.1	AT5G16940.1	0	GO:0016846; GO:0046872	AT5G16940.1	N0.HOG0024982	AT5G16940.1	OG0018918	AT5G16940.1	AT5G16940.1	135	136	100	99	135	94.074	269	AT5G16940.1	94.074	135	8	0	1	135	1	135	5.08e-95	269	100	135	136			Nucleus	protein_coding	carbon-sulfur lyases
LOC9309867	11	4	6953464	6954056	0.163506012950971	0.0193698894852782	0.163506012950971	0.0590810986385998	9.43175338242667	2.3810437820881	3.22324050123156	3.22304910044335	XP_002871745.1	AT5G16950.1	AT5G16950.1	0	GO:0016020	AT5G16950.1	N0.HOG0014241	AT5G16950.1	OG0008612	AT5G16950.1	AT5G16950.1	101	100	100	99	101	92.079	182	AT5G16950.1	92.079	101	6	1	1	101	1	99	1.04e-61	182	100	101	100			Unknown	protein_coding	NULL
LOC9307815	70	4	6954195	6957329	0.169551282051282	-0.00620384633926734	0.175129468232917	0.0625590592515809	19.1444751734449	3.47163521948232	3.2252497920881	3.22446288543046	XP_002873799.2	NA	NA	0	NA	NA	NA	NA	NA	NA	NA	NA	NA	NA	NA	NA	NA	NA	NA	NA	NA	NA	NA	NA	NA	NA	NA	NA	NA	NA	NA	NA	NA	NA	NA	NA	NA
LOC9309868	31	4	6957429	6959177	0.0952870838365314	-0.0082326398292611	0.141608391608392	0.0482364385323652	15.1698775315694	2.25712566349414	3.22635973856065	3.22590829884362	XP_002873800.1	AT5G16960.1	AT5G16960.1	0	GO:0009536; GO:0016628; GO:0016491; GO:0006979; GO:0032440	AT5G16960.1	N0.HOG0018131	AT5G16960.1	OG0012236	AT5G16960.1	AT5G16960.1	346	347	100	99	346	95.665	687	AT5G16960.1	95.665	346	15	0	1	346	1	346	0	687	100	346	347			Cytoplasm	protein_coding	Zinc-binding dehydrogenase family protein
LOC9309869	24	4	6959370	6961454	0.185176085176085	0.0031666117223043	0.185176085176085	0.0859092791281677	17.5803305241939	5.6879452146923	3.22767600161414	3.2272320434323	XP_002873801.1	AT5G16970.1	AT5G16970.1	0	GO:0005634; GO:0005654; GO:0005829; GO:0006979; GO:0009536; GO:0032440; GO:0035798; GO:0016491; GO:0016628	AT5G16970.1	N0.HOG0002826	AT5G16990.1, AT5G16970.1, AT5G17000.1	OG0000652	AT3G03080.1, AT5G16970.1, AT5G16980.2, AT5G16990.1, AT5G17000.1	AT5G16970.1	345	346	100	99	345	94.783	681	AT5G16970.1	94.783	345	18	0	1	345	1	345	0	681	100	345	346	AER, AER, AT-AER	2-alkenal reductase, alkenal reductase, alkenal reductase	Cytoplasm	protein_coding	alkenal reductase
LOC9309870	61	4	6962667	6965003	0.148450260558451	-0.015749082913944	0.148450260558451	0.0640667462472256	20.9054626075306	3.79555236379846	3.22993262748166	3.22927965462216	XP_002873802.1	AT5G16990.1, AT5G16970.1, AT5G17000.1	AT5G16970.1	0	GO:0005634; GO:0005654; GO:0005829; GO:0006979; GO:0009536; GO:0032440; GO:0035798;GO:0005886;GO:0009536; GO:0016628;GO:0016628; GO:0016491; GO:0016628		N0.HOG0002826	AT5G16990.1, AT5G16970.1, AT5G17000.1	OG0000652	AT3G03080.1, AT5G16970.1, AT5G16980.2, AT5G16990.1, AT5G17000.1		NA	NA	NA	NA	NA	NA	NA	AT5G16970.1, AT5G17000.1	91.86	344	27	1	4	346	2	345	0	654	99	346	346	AER, AER, AT-AER	2-alkenal reductase, alkenal reductase, alkenal reductase	Cytoplasm	protein_coding	alkenal reductase (AT5G16970.1), Zinc-binding dehydrogenase family protein (AT5G16990.1;AT5G17000.1)
LOC9309871	34	4	6966545	6968806	0.1625	-0.0606767344916963	0.264615384615385	0.0956315844127834	25.9884773303948	5.12011965388846	3.23222414962548	3.23153232824685	XP_002873803.1	AT5G17000.1	AT5G17000.1	0	GO:0009536; GO:0016628;GO:0016628; GO:0016491; GO:0006979; GO:0016628; GO:0032440	AT5G17000.1	N0.HOG0002826	AT5G16990.1, AT5G16970.1, AT5G17000.1	OG0000652	AT3G03080.1, AT5G16970.1, AT5G16980.2, AT5G16990.1, AT5G17000.1	AT5G17000.1	345	346	100	99	345	93.913	674	AT5G17000.1	93.913	345	21	0	1	345	1	345	0	674	100	345	346			Cytoplasm	protein_coding	Zinc-binding dehydrogenase family protein
LOC9309872	109	4	6969173	6974288	0.15311986863711	-0.0292722846292167	0.28125	0.0770404436771771	31.7936342308637	4.44860995571784	3.23563786254933	3.23409147391518	XP_002873804.1	AT5G17010.1	AT5G17010.1	0	GO:0000325; GO:0009536; GO:0016020; GO:0022857;GO:0016020; GO:0022857; GO:0055085; GO:0005355; GO:1904659	AT5G17010.1	N0.HOG0018130	AT5G17010.1	OG0012235	AT5G17010.1	AT5G17010.1	502	504	100	99	503	97.416	959	AT5G17010.1	97.416	503	12	1	1	502	1	503	0	959	100	502	504			Cell_membrane	protein_coding	Major facilitator superfamily protein
LOC9309873	119	4	6977137	6985348	0.148619957537155	-0.0200039192367904	0.205764840182648	0.0605911906510997	17.3011047666774	3.38305509933906	3.2423936591983	3.23982120736795	XP_002871746.1	AT5G17020.1	AT5G17020.1	0	GO:0005049; GO:0005634; GO:0005643; GO:0006611; GO:0009408; GO:0009553; GO:0009555; GO:0009846; GO:0009860; GO:0031267; GO:0031965; GO:0051028; GO:0006886; GO:0000055; GO:0000056; GO:0005737	AT5G17020.1	N0.HOG0004151	AT5G17020.1	OG0001231	AT3G03110.1, AT5G17020.1	AT5G17020.1	1076	1076	100	99	1076	97.955	2183	AT5G17020.1	97.955	1076	21	1	1	1076	1	1075	0	2183	100	1076	1076	ATCRM1, ATXPO1, HIT2, XPO1, XPO1A	ARABIDOPSIS THALIANA EXPORTIN 1, HEAT-INTOLERANT 2, EXPORTIN 1, exportin 1A	Unknown	protein_coding	exportin 1A
LOC9307816	41	4	6985774	6987621	0.124324324324324	0.0170643500249037	0.139862542955326	0.0485520418630666	8.03418862724329	1.66486543251206	3.24368971914446	3.2431555985611	XP_002873805.1	AT5G17030.1	AT5G17030.1	0	GO:0080043; GO:0080059; GO:0008194; GO:0080044	AT5G17030.1	N0.HOG0006351	AT5G17040.1, AT5G17030.1, AT5G17050.1	OG0002355	AT5G17030.1, AT5G17040.1, AT5G17050.1	AT5G17030.1	456	460	99	99	457	88.84	812	AT5G17030.1	88.84	457	49	1	1	455	1	457	0	833	99	456	460	UGT78D3	UDP-glucosyl transferase 78D3	Cytoplasm	protein_coding	UDP-glucosyl transferase 78D3
LOC9309874	24	4	6988262	6991902	0.0588798181872552	-0.0430595636133919	0.25	0.0653306358604806	2.56274587394684	0.863163667125403	3.2463583659585	3.24564970115444	XP_020877819.1	NA	NA	0	NA	NA	NA	NA	NA	NA	NA	NA	NA	NA	NA	NA	NA	NA	NA	NA	NA	NA	NA	NA	NA	NA	NA	NA	NA	NA	NA	NA	NA	NA	NA	NA	NA
LOC9309876	25	4	6992944	6994817	0.0793511342599856	-0.041331276926631	0.203616190671872	0.0628757473500518	16.0592775033828	2.89087465155986	3.24817236011082	3.24770550915544	XP_002873808.1	AT5G17050.1	AT5G17050.1	0	GO:0009698; GO:0035251; GO:0047213; GO:0047893; GO:0080043; GO:0008194; GO:0080044	AT5G17050.1	N0.HOG0006351	AT5G17040.1, AT5G17030.1, AT5G17050.1	OG0002355	AT5G17030.1, AT5G17040.1, AT5G17050.1	AT5G17050.1	461	461	99	99	460	90.652	860	AT5G17050.1	90.652	460	42	1	1	459	1	460	0	860	99	461	461	UGT78D2	UDP-glucosyl transferase 78D2	Chloroplast	protein_coding	UDP-glucosyl transferase 78D2
LOC9309877	35	4	6997319	6999680	0.217916366258111	-0.0303969219642725	0.235457613658924	0.0906984671502686	12.1646990855056	4.49499620825097	3.25112813593513	3.25034289100493	XP_020878395.1	AT5G17060.1	AT5G17060.1	0	GO:0003924; GO:0005525; GO:0005794; GO:0015031; GO:0016192	AT5G17060.1	N0.HOG0006349	AT5G17060.1	OG0002354	AT3G03120.1, AT5G17060.1	AT5G17060.1	192	193	100	99	192	99.479	395	AT5G17060.1	99.479	192	1	0	1	192	1	192	6.54e-143	395	100	192	193	ARFB1B, ATARFB1B	ADP-ribosylation factor B1B, ADP-ribosylation factor B1B	Golgi_body	protein_coding	ADP-ribosylation factor B1B
LOC9307817	10	4	6999993	7002820	0.0241463414634147	-0.0512033300005166	0.131642512077295	0.0560325982931996	12.616726347826	2.75310904132794	3.25305171663935	3.25259090212755	XP_020878392.1	AT5G17070.1	AT5G17070.1	0	GO:0005634; GO:0005829; GO:0019888; GO:0030289;GO:0019888; GO:0005737; GO:0030289	AT5G17070.1	N0.HOG0011507	AT5G17070.1	OG0006091	AT5G17070.1	AT5G17070.1	275	278	95	90	260	86.538	424	AT5G17070.1	86.538	260	25	2	16	275	28	277	1.09e-151	424	95	275	278	PP4R2L	PP4R2 LIKE	Nucleus	protein_coding	NULL
LOC9309878	5	4	7006774	7008730	0.315789473684211	0.0322271428099468	0.315789473684211	0.0940886466637374	2.69373788934944	0.871665016204379	3.25625727633613	3.25572979157014	NA	NA	NA	0	NA	NA	NA	NA	NA	NA	NA	NA	NA	NA	NA	NA	NA	NA	NA	NA	NA	NA	NA	NA	NA	NA	NA	NA	NA	NA	NA	NA	NA	NA	NA	NA	NA
LOC110227642	1	4	7018949	7019646	0.123836126629423	0.123836126629423	0.123836126629423	0.123836126629423	7.05020013848418	7.05020013848418	3.26338223885546	3.26338223885546	XP_020878217.1	AT5G17090.1, AT5G17100.1, AT5G17110.1, AT5G17120.1, AT5G17150.1	AT5G17150.1	0					OG0000517	AT5G17090.1, AT5G17100.1, AT5G17110.1, AT5G17120.1, AT5G17150.1		NA	NA	NA	NA	NA	NA	NA	AT5G17150.1	61.702	94	36	0	75	168	40	133	7.61e-35	121	51	183	203			Nucleus (AT5G17090.1;AT5G17100.1;AT5G17120.1;AT5G17150.1), Unknown (AT5G17110.1)	protein_coding	Cystatin/monellin superfamily protein
LOC9307818	105	4	7026226	7031219	0.334978070175439	0.0755617594601139	0.334978070175439	0.115784032413436	17.8760388298073	4.01962561910532	3.27041965457634	3.26890183272995	XP_020878214.1	NA	NA	0	NA	NA	NA	NA	NA	NA	NA	NA	NA	NA	NA	NA	NA	NA	NA	NA	NA	NA	NA	NA	NA	NA	NA	NA	NA	NA	NA	NA	NA	NA	NA	NA	NA
LOC110227640	46	4	7027874	7029402	0.25	0.032978431806157	0.25	0.103654343070398	15.7915690401958	3.3827142823022	3.26937031742579	3.26891631979908	XP_020878211.1	NA	NA	0	NA	NA	NA	NA	NA	NA	NA	NA	NA	NA	NA	NA	NA	NA	NA	NA	NA	NA	NA	NA	NA	NA	NA	NA	NA	NA	NA	NA	NA	NA	NA	NA	NA
LOC9309880	49	4	7037824	7040602	0.383928571428571	0.0623602409784635	0.462068965517241	0.137255109292812	15.4658806123114	3.73121933023073	3.27621733416544	3.27516867170122	XP_020878219.1	AT5G17130.1	AT5G17130.1	0		AT5G17130.1	N0.HOG0031012	AT5G17130.1	OG0024604	AT5G17130.1	AT5G17130.1	206	124	59	98	121	95.041	242	AT5G17130.1	95.041	121	6	0	1	121	1	121	2.2e-83	242	59	206	124			Nucleus	protein_coding	cysteine-type peptidases
LOC9307819	16	4	7040640	7041236	0.33811320754717	0.147188213759794	0.33811320754717	0.160084997527126	26.5374123585266	5.41570824422946	3.27661588637373	3.27640168751985	XP_020878218.1	AT5G17140.1	AT5G17140.1	0	GO:0006508; GO:0008234	AT5G17140.1	N0.HOG0003399	AT5G17080.1, AT5G17140.1, AT1G03720.1	OG0000873	AT1G03720.1, AT5G17080.1, AT5G17140.1	AT5G17140.1	112	113	100	99	112	87.5	202	AT5G17140.1	87.5	112	14	0	1	112	1	112	4.75e-69	202	100	112	113			Chloroplast	protein_coding	Cysteine proteinases superfamily protein
LOC9307820	27	4	7041318	7042419	0.209823659598772	-0.0262158640811137	0.209823659598772	0.088404405633477	17.2378152097397	4.57948158738376	3.27735299368369	3.27705951577324	XP_020878215.1	AT5G17120.1, AT5G17150.1	AT5G17150.1	0		AT5G17120.1, AT5G17150.1	N0.HOG0002438	AT5G17120.1, AT5G17150.1	OG0000517	AT5G17090.1, AT5G17100.1, AT5G17110.1, AT5G17120.1, AT5G17150.1	AT5G17150.1	196	203	100	99	202	84.653	330	AT5G17150.1	84.653	202	25	2	1	196	1	202	4.24e-117	330	100	196	203			Nucleus	protein_coding	Cystatin/monellin superfamily protein
LOC9309881	102	4	7042471	7045436	0.263960186527685	0.00312712908978155	0.348464127919209	0.0964736298377576	38.0030193068096	6.23701402068928	3.27916331454377	3.27839315360574	XP_020878208.1	AT5G17160.1	AT5G17160.1	0		AT5G17160.1	N0.HOG0011506	AT5G17160.1	OG0006090	AT5G17160.1	AT5G17160.1	568	570	100	99	572	85.49	861	AT5G17160.1	85.49	572	76	3	1	568	1	569	0	861	100	568	570			Nucleus	protein_coding	NULL
LOC9309882	55	4	7045768	7047298	0.260971407553671	0.0290679423633094	0.260971407553671	0.101929416758425	32.9486368254946	7.33107674059067	3.28033876806131	3.27984934082918	XP_002873815.1	AT5G17165.1	AT5G17165.1	0		AT5G17165.1	N0.HOG0025637	AT5G17165.1	OG0019526	AT5G17165.1	AT5G17165.1	120	117	100	99	120	85	215	AT5G17165.1	85	120	14	1	1	120	1	116	3.97e-74	215	100	120	117			Nucleus	protein_coding	NULL
LOC9309883	73	4	7047655	7049777	0.208417338709677	-0.0141729457162068	0.276632118816113	0.0811313140592193	27.2334200658063	3.71075712289237	3.28182339034257	3.28118814560699	XP_020878714.1	AT5G17170.1	AT5G17170.1	0	GO:0003729; GO:0005506; GO:0009507; GO:0009534; GO:0009535; GO:0009536; GO:0009941; GO:0005515	AT5G17170.1	N0.HOG0018129	AT5G17170.1	OG0012234	AT5G17170.1	AT5G17170.1	269	272	99	99	268	97.015	522	AT5G17170.1	97.015	268	8	0	2	269	4	271	0	522	99	269	272	ENH1	enhancer of sos3-1	Chloroplast	protein_coding	rubredoxin family protein
LOC9307821	13	4	7050107	7050636	0.0964390142021721	0.0162513229849512	0.0964390142021721	0.0433596433808522	3.04587054681771	1.00527493228327	3.28231928479528	3.28222599259102	XP_002871752.2	AT5G17180.1	AT5G17180.1	0		AT5G17180.1	N0.HOG0022955	AT5G17180.1	OG0016955	AT5G17180.1	AT5G17180.1	132	124	94	98	124	86.29	211	AT5G17180.1	86.29	124	15	2	1	124	1	122	5.09e-72	211	94	132	124			Nucleus	protein_coding	NULL
LOC9307822	16	4	7051035	7051824	0.199943470887507	0.00796518287144119	0.199943470887507	0.0540940050316542	12.0902452386627	2.18603211954337	3.28308945173542	3.28289032868512	XP_020878778.1	AT5G17190.1	AT5G17190.1	0	GO:0005789; GO:0006886; GO:0006888; GO:0070973; GO:0005783; GO:0016020	AT5G17190.1	N0.HOG0004909	AT5G17190.1	OG0001606	AT3G03160.1, AT5G17190.1	AT5G17190.1	130	131	100	99	130	99.231	266	AT5G17190.1	99.231	130	1	0	1	130	1	130	5.49e-94	266	100	130	131			Mitochondrion	protein_coding	NULL
LOC9307823	39	4	7052132	7054946	0.167692963092057	0.0101202836533473	0.221893903215536	0.0792377944164876	33.9231486304152	6.20564441338707	3.28501976680875	3.28416360715535	XP_002873816.2	NA	NA	0	NA	NA	NA	NA	NA	NA	NA	NA	NA	NA	NA	NA	NA	NA	NA	NA	NA	NA	NA	NA	NA	NA	NA	NA	NA	NA	NA	NA	NA	NA	NA	NA	NA
LOC9309884	34	4	7055297	7057110	0.2015	-0.00776889925371823	0.266762770754787	0.112541684662589	23.8649921885521	7.33624779734434	3.28634031536986	3.28587382526142	XP_020878886.1	AT5G17210.1	AT5G17210.1	0	GO:0016020	AT5G17210.1	N0.HOG0012654	AT5G17210.1	OG0007150	AT5G17210.1	AT5G17210.1	212	210	100	99	212	93.868	408	AT5G17210.1	93.868	212	10	1	1	212	1	209	1.34e-147	408	100	212	210			Extracellular	protein_coding	Protein of unknown function (DUF1218)
LOC9307824	26	4	7057543	7058626	0.105935439083651	-0.0574814963640948	0.206547619047619	0.0933147914169871	18.7243144350879	5.95614187072706	3.28727088273791	3.28690209361548	XP_020878885.1	AT5G17220.1	AT5G17220.1	0	GO:0004364; GO:0005634; GO:0005737; GO:0005829; GO:0009407; GO:0009705; GO:0043169; GO:0046283; GO:1900384; GO:0006749; GO:0043295	AT5G17220.1	N0.HOG0016227	AT5G17220.1	OG0010469	AT5G17220.1	AT5G17220.1	214	215	100	99	214	96.262	432	AT5G17220.1	96.262	214	8	0	1	214	1	214	5.53e-157	432	100	214	215	ATGSTF12, GST26, GSTF12, TT19	ARABIDOPSIS THALIANA GLUTATHIONE S-TRANSFERASE PHI 12, GLUTATHIONE S-TRANSFERASE 26, glutathione S-transferase phi 12, TRANSPARENT TESTA 19	Unknown	protein_coding	glutathione S-transferase phi 12
LOC9307825	52	4	7059518	7062721	0.140521751101322	-0.0470889711100448	0.232160312805474	0.0721130328156457	20.8447028103819	4.44830321972362	3.28964138066494	3.28879035420198	XP_020878081.1	NA	NA	0	NA	NA	NA	NA	NA	NA	NA	NA	NA	NA	NA	NA	NA	NA	NA	NA	NA	NA	NA	NA	NA	NA	NA	NA	NA	NA	NA	NA	NA	NA	NA	NA	NA
LOC9309885	83	4	7077647	7081236	0.285822021116139	-0.0285555186574368	0.285822021116139	0.0866683989727843	23.6815362629189	4.3502867900144	3.2864884586109	3.28582453945995	XP_002871756.1	AT5G17240.1	AT5G17240.1	0	GO:0008168; GO:0032259; GO:0005515; GO:0016279; GO:0018026	AT5G17240.1	N0.HOG0020376	AT5G17240.1	OG0014411	AT5G17240.1	AT5G17240.1	493	492	99	99	491	90.428	906	AT5G17240.1	90.428	491	46	1	4	493	1	491	0	906	99	493	492	SDG40	SET domain group 40	Chloroplast	protein_coding	SET domain group 40
LOC9307826	151	4	7081195	7085979	0.170707070707071	-0.0258142626195282	0.189115646258503	0.0620786471281023	24.3991885353618	3.31060082903733	3.28534483891244	3.28459902000546	XP_020878189.1	AT5G17250.1	AT5G17250.1	0	GO:0005789; GO:0006506; GO:0051377; GO:0016772	AT5G17250.1	N0.HOG0018127	AT5G17250.1	OG0012232	AT5G17250.1	AT5G17250.1	946	947	100	99	946	94.82	1864	AT5G17250.1	94.82	946	49	0	1	946	1	946	0	1864	100	946	947			Unknown	protein_coding	Alkaline-phosphatase-like family protein
LOC9309886	58	4	7087605	7091468	0.148407079646018	-0.0134328707088111	0.186542443064182	0.0703299099907241	17.2566632452667	4.11071672556627	3.28329350313044	3.28270256700658	XP_020876528.1	AT5G17260.1	AT5G17260.1	0	GO:0003677; GO:0003700; GO:0005634; GO:0090602; GO:0090603; GO:0006355	AT5G17260.1	N0.HOG0012653	AT5G17260.1	OG0007149	AT5G17260.1	AT5G17260.1	493	477	100	99	494	89.676	910	AT5G17260.1	89.676	494	32	3	1	493	1	476	0	910	100	493	477	anac086, NAC086, NAC86	NAC domain containing protein 86, NAC domain containing protein 86, NAC domain containing protein 86	Nucleus	protein_coding	NAC domain containing protein 86
LOC9309887	180	4	7099504	7107927	0.433082706766917	0.00177025572698568	0.440140845070423	0.0639915105927024	31.630805528664	2.79548471927948	3.27946904398188	3.27796598823051	XP_002871757.1	AT5G17270.1	AT5G17270.1	0	GO:0005515	AT5G17270.1	N0.HOG0008713	AT5G17270.1, AT5G37130.1	OG0003791	AT5G17270.1, AT5G37130.1	AT5G17270.1	892	900	100	99	899	92.992	1673	AT5G17270.1	92.992	899	56	2	1	892	1	899	0	1673	100	892	900			Nucleus	protein_coding	Protein prenylyltransferase superfamily protein
LOC9307828	97	4	7108113	7113738	0.226190476190476	0.0173817753570486	0.226190476190476	0.0527854206155755	15.8414011937555	2.6532781859103	3.27669044556092	3.27572426574673	XP_020879301.1	AT5G37130.1	AT5G37130.1	0	GO:0048046; GO:0005515	AT5G37130.1	N0.HOG0008713	AT5G17270.1, AT5G37130.1	OG0003791	AT5G17270.1, AT5G37130.1		NA	NA	NA	NA	NA	NA	NA	AT5G17270.1	82.961	939	108	4	1	927	1	899	0	1524	99	931	900			Nucleus	protein_coding	Protein prenylyltransferase superfamily protein
LOC9307829	24	4	7113859	7114592	0.295454545454545	0.0151162128757172	0.295454545454545	0.094060608941824	7.93781470327952	2.20587278962286	3.27488078277574	3.27474621728525	XP_020879305.1	AT5G17280.1	AT5G17280.1	0		AT5G17280.1	N0.HOG0019090	AT5G17280.1	OG0013170	AT5G17280.1	AT5G17280.1	133	136	100	99	136	85.294	208	AT5G17280.1	85.294	136	16	3	1	133	1	135	7.59e-71	208	100	133	136			Chloroplast	protein_coding	NULL
LOC9307830	70	4	7114600	7117659	0.138488112172323	0.0355511076781818	0.173076923076923	0.0558098595279836	13.3862090679773	3.0005155722349	3.27461795537867	3.27424031728205	XP_002873820.2	AT5G17290.1	AT5G17290.1	0	GO:0005737; GO:0006914; GO:0010150; GO:0015031; GO:0042594; GO:0050832; GO:0000422; GO:0005776; GO:0006995; GO:0019776; GO:0034045; GO:0034274; GO:0034727; GO:0044233; GO:0061739; GO:0061908; GO:0061912	AT5G17290.1	N0.HOG0014304	AT5G17290.1	OG0008670	AT5G17290.1	AT5G17290.1	365	338	92	99	337	96.142	672	AT5G17290.1	96.142	337	13	0	29	365	1	337	0	672	92	365	338	APG5, ATATG5, ATG5	AUTOPHAGY 5, AUTOPHAGY 5	Cytoplasm	protein_coding	autophagy protein Apg5 family
LOC9309888	85	4	7117775	7120546	0.170591383462671	0.022905929212454	0.27027027027027	0.0681017406365663	15.9418989772803	1.97048112253849	3.27362786534264	3.2731388781756	XP_020879303.1	AT5G17300.1	AT5G17300.1	0	GO:0003677; GO:0003700; GO:0005634; GO:0006355; GO:0007623; GO:0009734; GO:0010600	AT5G17300.1	N0.HOG0010095	AT5G17300.1	OG0004855	AT5G17300.1	AT5G17300.1	388	388	97	99	376	94.33	661	AT5G17300.1	94.947	376	18	1	1	376	1	375	0	675	97	388	388	RVE1	REVEILLE 1	Nucleus	protein_coding	Homeodomain-like superfamily protein
LOC110227906	5	4	7120327	7120502	0.170591383462671	0.125958137991477	0.170591383462671	0.125958137991477	5.60160824056907	3.25058933516501	3.27280733102984	3.27279265115815	XP_020879571.1	AT5G17305.1	AT5G17305.1	0		AT5G17305.1	N0.HOG0036318	AT5G17305.1	OG0029901	AT5G17305.1		NA	NA	NA	NA	NA	NA	NA	AT5G17305.1	68.333	60	14	1	1	55	14	73	2.44e-16	65.5	95	58	75			Nucleus	protein_coding	NULL
LOC9309889	125	4	7131862	7136156	0.221726618705036	-0.000638634869580462	0.221726618705036	0.0625484217631908	18.3882794487356	2.71551310804575	3.26909729795537	3.26842522137728	XP_002873822.1	AT5G17310.2	AT5G17310.2	0	GO:0003983; GO:0005829; GO:0005886; GO:0006011; GO:0009536; GO:0009555; GO:0052543; GO:0070569	AT5G17310.2	N0.HOG0007352	AT5G17310.2	OG0002921	AT3G03250.2, AT5G17310.2	AT5G17310.2	469	471	99	99	468	97.863	934	AT5G17310.2	97.863	468	10	0	2	469	3	470	0	934	99	469	471	AtUGP2, UGP2	UDP-GLUCOSE PYROPHOSPHORYLASE 2, UDP-glucose pyrophosphorylase 2	Cytoplasm	protein_coding	UDP-glucose pyrophosphorylase 2
LOC110227117	51	4	7156595	7161280	0.149289940828402	-0.00629153553788172	0.149289940828402	0.0563429514419304	14.2046242239069	3.10792541613551	3.26118266757023	3.26049827307272	XP_020876074.1	AT5G17320.1	AT5G17320.1	0	GO:0003700; GO:0005634; GO:0008289; GO:0043565; GO:0003677	AT5G17320.1	N0.HOG0008617	AT5G17320.1, AT1G34650.1	OG0003720	AT1G34650.1, AT5G17320.1	AT5G17320.1	714	719	100	98	702	82.869	1231	AT5G17320.1	82.869	718	119	2	1	714	1	718	0	1247	100	714	719	HDG9	homeodomain GLABROUS 9	Nucleus	protein_coding	homeodomain GLABROUS 9
LOC9309890	49	4	7165346	7169610	0.252525252525253	0.010676237038327	0.252525252525253	0.0650511352827292	28.9999305602612	3.03533755924634	3.25836432451849	3.25768926104899	XP_002871761.1	AT5G17330.1	AT5G17330.1	0	GO:0004351; GO:0005516; GO:0006536; GO:0030170; GO:0060090; GO:0005829; GO:0006538; GO:0016830; GO:0019752	AT5G17330.1	N0.HOG0008712	AT5G17330.1	OG0003790	AT5G17330.1	AT5G17330.1	502	503	100	99	502	97.41	1020	AT5G17330.1	97.41	502	13	0	1	502	1	502	0	1020	100	502	503	AtGAD1, GAD, GAD1	glutamate decarboxylase, GLUTAMATE DECARBOXYLASE 1	Unknown	protein_coding	glutamate decarboxylase
LOC9307831	17	4	7171864	7172549	0.134793956733424	-0.0216532882136405	0.134793956733424	0.0644475932356944	13.1510350548059	4.54763094714961	3.25629183433624	3.25620016526849	XP_002873823.1	AT5G17340.1	AT5G17340.1	0	GO:0005576; GO:0009567; GO:0031982; GO:0080155; GO:2000008	AT5G17340.1	N0.HOG0016226	AT5G17340.1	OG0010468	AT5G17340.1	AT5G17340.1	160	161	100	99	160	93.75	261	AT5G17340.1	93.75	160	10	0	1	160	1	160	2.16e-99	282	100	160	161			Extracellular	protein_coding	Putative membrane lipoprotein
LOC9309891	32	4	7176028	7177093	0.161508540503974	0.00303451058467883	0.200090307043949	0.0957531326564812	27.8091598474606	4.80404396982815	3.25495686347187	3.25477630986441	XP_020879177.1	AT5G17350.1	AT5G17350.1	0	GO:0009620	AT5G17350.1	N0.HOG0009259	AT5G17350.1	OG0004169	AT5G17350.1	AT5G17350.1	184	184	100	99	185	95.135	348	AT5G17350.1	95.135	185	6	2	1	184	1	183	6.9e-125	348	100	184	184			Chloroplast	protein_coding	NULL
LOC9307832	33	4	7178510	7179745	0.199438202247191	-0.00180550537094427	0.199438202247191	0.0523822538928993	9.50395772775449	1.82975137528469	3.25410940537693	3.25395799309707	XP_002871763.2	AT5G17360.1	AT5G17360.1	0	GO:0016874	AT5G17360.1	N0.HOG0020375	AT5G17360.1	OG0014410	AT5G17360.1	AT5G17360.1	192	176	91	99	174	89.655	264	AT5G17360.1	89.655	174	18	0	18	191	1	174	2.71e-91	264	91	192	176			Nucleus	protein_coding	NULL
LOC9307833	30	4	7179854	7183002	0.120500305064063	0.0324409337925952	0.120500305064063	0.0728238191639529	22.8022146345039	5.08422681666112	3.25371163854795	3.25320772577629	XP_020876548.1	AT5G17370.2	AT5G17370.2	0	GO:0005515	AT5G17370.2	N0.HOG0018126	AT5G17370.2	OG0012231	AT5G17370.2	AT5G17370.2	495	545	100	96	527	88.235	940	AT5G17370.2	88.235	527	28	3	1	495	20	544	0	940	100	495	545			Nucleus	protein_coding	NULL
LOC9309892	55	4	7183026	7185186	0.217230199166281	0.0158407798157169	0.217230199166281	0.0845225052375743	20.3767689600898	4.9849904651388	3.252626674232	3.25234222622201	XP_020876547.1	AT5G17380.1	AT5G17380.1	0	GO:0000287; GO:0005829; GO:0009536; GO:0030976; GO:0106359; GO:0003824; GO:0001561; GO:0005777	AT5G17380.1	N0.HOG0022954	AT5G17380.1	OG0016954	AT5G17380.1	AT5G17380.1	572	573	100	99	572	96.853	1128	AT5G17380.1	96.853	572	18	0	1	572	1	572	0	1128	100	572	573	AtHPCL, HPCL	2-hydroxy-phytanoyl-CoA lyase	Chloroplast	protein_coding	Thiamine pyrophosphate dependent pyruvate decarboxylase family protein
LOC9309893	21	4	7185810	7187151	0.104669547802256	0.0161895917784172	0.172082166199813	0.0580083199022281	9.25668392017745	2.34673070994155	3.25178434447652	3.25160459312604	XP_002871764.1	AT5G17390.1	AT5G17390.1	0	GO:0016787	AT5G17390.1	N0.HOG0006347	AT5G17390.1	OG0002353	AT3G03290.1, AT5G17390.1	AT5G17390.1	286	286	100	99	286	96.154	548	AT5G17390.1	96.154	286	10	1	1	286	1	285	0	548	100	286	286			Unknown	protein_coding	Adenine nucleotide alpha hydrolases-like superfamily protein
LOC9307834	37	4	7187141	7188793	0.156207827260459	0.019469617932355	0.236072807501379	0.065765423381606	14.7124686704131	2.83960746632929	3.25138946233849	3.25113820835613	XP_020876268.1	AT5G17400.1	AT5G17400.1	0	GO:0005471; GO:0005743; GO:0005789; GO:0048316; GO:0048364; GO:0048367; GO:0051503; GO:0140021; GO:1990544; GO:0055085	AT5G17400.1	N0.HOG0016225	AT5G17400.1	OG0010467	AT5G17400.1	AT5G17400.1	306	307	100	99	306	97.712	617	AT5G17400.1	97.712	306	7	0	1	306	1	306	0	617	100	306	307	ER-ANT1	endoplasmic reticulum-adenine nucleotide transporter 1	Mitochondrion	protein_coding	endoplasmic reticulum-adenine nucleotide transporter 1
LOC9309894	92	4	7188911	7195168	0.175920514319112	0.0312008691802256	0.175920514319112	0.0562495659815975	23.8689880807306	3.14372556235149	3.25079169027076	3.24980595862648	XP_020876265.1	AT5G17410.2	AT5G17410.2	0	GO:0000922; GO:0000930; GO:0005635; GO:0005737; GO:0005938; GO:0007020; GO:0033566; GO:0043015; GO:0048229; GO:0055028; GO:0090063; GO:0000226; GO:0000278; GO:0005815; GO:0031122; GO:0051011; GO:0051225; GO:0051321	AT5G17410.2	N0.HOG0020374	AT5G17410.2	OG0014409	AT5G17410.2	AT5G17410.2	679	680	100	99	679	98.822	1395	AT5G17410.2	98.822	679	8	0	1	679	1	679	0	1395	100	679	680			Nucleus	protein_coding	Spc97 / Spc98 family of spindle pole body (SBP) component
LOC9307835	74	4	7195157	7200067	0.205580558055806	0.00454109199740581	0.205580558055806	0.0614964787589292	16.5970758588975	2.42659879290295	3.24881535645329	3.24795761135987	XP_002873827.1	AT5G17420.1	AT5G17420.1	0	GO:0005886; GO:0009507; GO:0009832; GO:0009834; GO:0010330; GO:0010400; GO:0016760; GO:0030244; GO:0046872; GO:0016020	AT5G17420.1	N0.HOG0018125	AT5G17420.1	OG0012230	AT5G17420.1	AT5G17420.1	1025	1027	100	99	1026	99.123	2107	AT5G17420.1	99.123	1026	8	1	1	1025	1	1026	0	2107	100	1025	1027	ATCESA7, CESA7, IRX3, MUR10	CELLULOSE SYNTHASE CATALYTIC SUBUNIT 7, IRREGULAR XYLEM 3, MURUS 10	Cell_membrane	protein_coding	Cellulose synthase family protein
LOC9309895	43	4	7201304	7205352	0.140978348035285	-0.00956845468218	0.17273389151802	0.067982172727517	17.1082387072331	3.36229687690392	3.24682748387205	3.24620480059727	XP_002873828.1	AT5G17430.1	AT5G17430.1	0	GO:0003677; GO:0003700; GO:0005634; GO:0008283; GO:0006355	AT5G17430.1	N0.HOG0012652	AT5G17430.1	OG0007148	AT5G17430.1	AT5G17430.1	587	585	99	99	586	90.614	1008	AT5G17430.1	90.614	586	52	2	1	586	1	583	0	1008	99	587	585	BBM, PLT4	BABY BOOM, PLETHORA4	Nucleus	protein_coding	Integrase-type DNA-binding superfamily protein
LOC9309896	65	4	7209762	7213964	0.147901725280106	0.00763540447095032	0.147901725280106	0.053238863206298	18.4670481419877	2.05528631469212	3.2441395929552	3.24348584802099	XP_002871766.1	AT5G17440.1	AT5G17440.1	0	GO:0003729; GO:0005685; GO:0006376	AT5G17440.1	N0.HOG0006683	AT5G17440.1	OG0002536	AT3G03340.2, AT5G17440.1	AT5G17440.1	404	405	100	99	404	97.772	798	AT5G17440.1	97.772	404	9	0	1	404	1	404	0	798	100	404	405	LUC7B	LETHAL UNLESS CBC 7 B	Nucleus	protein_coding	LUC7 related protein
LOC9307836	18	4	7215310	7217210	0.105535740460253	0.0149650450939507	0.126738644100768	0.051754467731721	8.51023939719043	1.86895020787604	3.24216806695597	3.24195716399589	XP_002871767.1	AT5G17450.1	AT5G17450.1	0	GO:0016020; GO:0046872; GO:0071585;GO:0046872	AT5G17450.1	N0.HOG0012651	AT5G17450.1	OG0007147	AT5G17450.1	AT5G17450.1	149	150	100	99	149	100	314	AT5G17450.1	100	149	0	0	1	149	1	149	3.43e-112	314	100	149	150	AtHMP45, HIPP21	HEAVY METAL ASSOCIATED PROTEIN 45, heavy metal associated isoprenylated plant protein 21	Nucleus	protein_coding	Heavy metal transport/detoxification superfamily protein
LOC9307837	57	4	7217419	7219919	0.258333333333333	-0.012824291879778	0.258333333333333	0.068820707053831	9.2440265939022	2.2718322396008	3.24168375939869	3.24125570050322	XP_002873829.1	AT5G17460.1	AT5G17460.1	0	GO:2000214	AT5G17460.1	N0.HOG0020373	AT5G17460.1	OG0014408	AT5G17460.1	AT5G17460.1	309	310	100	99	309	94.175	570	AT5G17460.1	94.175	309	18	0	1	309	1	309	0	571	100	309	310	DFR1	Drought and Freezing Responsive gene 1	Unknown	protein_coding	NULL
LOC9309897	20	4	7220013	7220634	0.104327341055052	-0.0100475097701649	0.104327341055052	0.0488584041932735	6.93238137653422	2.05462206463574	3.2408593788313	3.24077251758178	XP_002873830.1	AT3G03341.1	AT3G03341.1	0	GO:0016020				OG0002223	AT3G03341.1		NA	NA	NA	NA	NA	NA	NA	AT3G03341.1	80.556	72	14	0	2	73	1	72	5.58e-39	123	99	73	73			Unknown	protein_coding	NULL
LOC9309898	15	4	7221776	7222899	0.0739805124503789	0.000886705943782329	0.0739805124503789	0.0314747007587982	2.68606058604307	0.791608746119714	3.240274107091	3.24011350459374	XP_002873831.1	AT5G17470.1	AT5G17470.1	0	GO:0005509	AT5G17470.1	N0.HOG0003123	AT5G17470.1, AT2G36180.1	OG0000762	AT2G36180.1, AT3G03400.1, AT5G17470.1	AT5G17470.1	146	147	99	98	144	87.5	258	AT5G17470.1	87.5	144	18	0	1	144	1	144	4.59e-90	258	99	146	147			Nucleus	protein_coding	EF hand calcium-binding protein family
LOC9309899	9	4	7223979	7224530	0.0975211431904345	0.0189147036179162	0.125524475524476	0.0786724177840793	4.83961928894201	2.66007782210752	3.23955774217338	3.23950791893104	XP_002871768.1	AT5G17480.1	AT5G17480.1	0	GO:0005509; GO:0005737	AT5G17480.1	N0.HOG0005775	AT5G17480.1	OG0002061	AT3G03430.1, AT5G17480.1	AT5G17480.1	83	84	100	99	83	98.795	164	AT5G17480.1	98.795	83	1	0	1	83	1	83	7.04e-55	164	100	83	84	APC1, PC1	pollen calcium-binding protein 1, pollen calcium-binding protein 1	Mitochondrion	protein_coding	pollen calcium-binding protein 1
LOC9307838	37	4	7225552	7227710	0.238349885408709	-0.0218291068822061	0.238349885408709	0.099088504102657	17.5151327827273	4.72311835052468	3.23906574210692	3.23885210172239	NA	NA	NA	0	NA	NA	NA	NA	NA	NA	NA	NA	NA	NA	NA	NA	NA	NA	NA	NA	NA	NA	NA	NA	NA	NA	NA	NA	NA	NA	NA	NA	NA	NA	NA	NA	NA
LOC9307839	42	4	7227996	7230073	0.160326086956522	0.024138758260798	0.160326086956522	0.0757318311915834	6.19007254137626	1.95571628606588	3.2382990553584	3.23803454140922	XP_020878075.1	AT5G17490.1	AT5G17490.1	0	GO:0003700; GO:0005634; GO:0009739; GO:0009740	AT5G17490.1	N0.HOG0016224	AT5G17490.1	OG0010466	AT5G17490.1	AT5G17490.1	522	524	100	99	523	92.543	977	AT5G17490.1	92.543	523	38	1	1	522	1	523	0	977	100	522	524	AtRGL3, RGL3	RGA-like protein 3	Nucleus	protein_coding	RGA-like protein 3
LOC9309900	65	4	7231146	7234632	0.244609929078014	-0.00598657274519482	0.244609929078014	0.0700714717065325	20.0064184513806	3.44830512825969	3.23726120766119	3.23671401384134	XP_002871770.2	AT5G17500.1	AT5G17500.1	0	GO:0000272; GO:0016985; GO:0004553	AT5G17500.1	N0.HOG0024308	AT5G17500.1	OG0018265	AT5G17500.1	AT5G17500.1	539	527	98	96	504	92.41	1000	AT5G17500.1	92.41	527	39	1	13	539	1	526	0	1009	98	539	527			Extracellular	protein_coding	Glycosyl hydrolase superfamily protein
LOC9307840	44	4	7234682	7236788	0.115480649188514	-0.0407607812939047	0.198989898989899	0.0722351641870438	20.002638797328	3.31008939257816	3.23613361402353	3.23577695404049	XP_002873833.1	AT5G17510.1	AT5G17510.1	0	GO:0003690; GO:0005634; GO:0016514; GO:0045893	AT5G17510.1	N0.HOG0007214	AT5G17510.1	OG0002845	AT3G03460.1, AT5G17510.1	AT5G17510.1	370	370	100	99	374	94.385	693	AT5G17510.1	94.385	374	12	4	1	370	1	369	0	693	100	370	370	BRIP2	BRAHMA-interacting protein 2	Nucleus	protein_coding	NULL
LOC9309901	78	4	7236987	7239925	0.152716186252772	-0.0388667804195575	0.268394648829431	0.0767985076149413	35.8038794536557	5.67926941953795	3.23538712011161	3.23499227084754	XP_020878410.1	AT5G17523.1, AT5G17520.1	AT5G17520.1	0	GO:0000023; GO:0005363; GO:0005975; GO:0005983; GO:0009536; GO:0009624; GO:0009706; GO:0009941;GO:0009536; GO:0016020;GO:0016020; GO:0009941	AT5G17523.1, AT5G17520.1	N0.HOG0010094	AT5G17523.1, AT5G17520.1	OG0004854	AT5G17520.1, AT5G17523.1	AT5G17520.1	413	416	100	99	415	95.181	794	AT5G17520.1	95.181	415	18	1	1	413	1	415	0	794	100	413	416	MEX1, RCP1	MALTOSE EXCESS 1, ROOT CAP 1	Chloroplast	protein_coding	NULL (AT5G17523.1), root cap 1 (RCP1) (AT5G17520.1)
LOC9309902	124	4	7240080	7244651	0.160751028806584	-0.0339155903137398	0.207430340557276	0.0694327999731226	25.4582603349235	3.8899427805775	3.23441722291218	3.23374392932538	XP_020878406.1	NA	NA	0	NA	NA	NA	NA	NA	NA	NA	NA	NA	NA	NA	NA	NA	NA	NA	NA	NA	NA	NA	NA	NA	NA	NA	NA	NA	NA	NA	NA	NA	NA	NA	NA	NA
LOC9307841	52	4	7244529	7246789	0.161841547803982	-0.0613679484647255	0.236940298507463	0.0929253012345993	26.3801811614193	5.10888111809141	3.232981608386	3.23262295130923	XP_020878409.1	AT5G17540.1	AT5G17540.1	0		AT5G17540.1	N0.HOG0003030	AT5G17540.1	OG0000728	AT3G03480.1, AT5G17540.1	AT5G17540.1	447	462	99	98	453	86.093	789	AT5G17540.1	86.093	453	53	3	1	445	1	451	0	789	99	447	462			Cytoplasm	protein_coding	HXXXD-type acyl-transferase family protein
LOC9309903	51	4	7246881	7248754	0.133540372670807	-0.0199353292215163	0.207017543859649	0.0736215140544108	11.5311179801274	2.73969569211701	3.23222678092247	3.23195032823136	XP_002873836.1	AT5G17550.1	AT5G17550.1	0	GO:0005777;GO:0005778; GO:0005829; GO:0006625; GO:0007031; GO:0015031; GO:0005777; GO:0005778; GO:0033328; GO:0045046	AT5G17550.1	N0.HOG0005208	AT3G03490.1, AT5G17550.1	OG0001763	AT3G03490.1, AT5G17550.1	AT5G17550.1	245	246	100	99	245	97.143	489	AT5G17550.1	97.143	245	7	0	1	245	1	245	2.11e-178	489	100	245	246	AtPEX19-2, PEX19-2, PEX19B	peroxin 19-2	Nucleus	protein_coding	peroxin 19-2
LOC9309904	26	4	7248958	7250403	0.133953488372093	-0.00713933799927282	0.221361940298508	0.0812417653864662	19.2022455358601	4.61161791092758	3.23158028962992	3.23140057584969	XP_002871772.1	AT5G17560.1	AT5G17560.1	0	GO:0005739; GO:0009507; GO:0009536; GO:0016226	AT5G17560.1	N0.HOG0010701	AT5G17560.1	OG0005365	AT5G17560.1	AT5G17560.1	174	178	100	99	177	94.915	340	AT5G17560.1	94.915	177	6	1	1	174	1	177	8.59e-122	340	100	174	178	BolA4	homolog of E.coli BolA 4	Unknown	protein_coding	BolA-like family protein
LOC9307842	40	4	7253874	7255965	0.0669955802240724	-0.025008494357241	0.136157885207315	0.0457222761622898	10.3602533271444	2.1468805188196	3.22998858127158	3.22966677797078	XP_020877288.1	NA	NA	0	NA	NA	NA	NA	NA	NA	NA	NA	NA	NA	NA	NA	NA	NA	NA	NA	NA	NA	NA	NA	NA	NA	NA	NA	NA	NA	NA	NA	NA	NA	NA	NA	NA
LOC9307843	45	4	7255728	7258255	0.127439368302313	-0.0152411648545128	0.147462550549638	0.0560679875355281	8.91534488441265	1.90995935287152	3.22938952711899	3.22909509633003	XP_020877287.1	AT5G17580.2	AT5G17580.2	0	GO:0016567; GO:0005515	AT5G17580.2	N0.HOG0011505	AT5G17580.2	OG0006089	AT5G17580.2	AT5G17580.2	561	564	99	95	537	91.489	964	AT5G17580.2	91.489	564	41	5	1	559	1	562	0	967	99	561	564			Nucleus	protein_coding	NULL
LOC9307844	20	4	7258304	7261443	0.230917339241441	0.0221685476755579	0.230917339241441	0.10666940788448	24.2117745128403	6.44676182250917	3.228573159582	3.22828916175862	XP_020877289.1	AT5G17590.1	AT5G17590.1	0	GO:0016020	AT5G17590.1	N0.HOG0010700	AT5G17590.1	OG0005364	AT5G17590.1	AT5G17590.1	200	193	100	99	200	85	299	AT5G17590.1	87	200	18	2	1	200	1	192	2.94e-114	323	100	200	193			Unknown	protein_coding	Putative membrane lipoprotein
LOC9309905	63	4	7265664	7268086	0.207602339181287	0.00397672119699602	0.207602339181287	0.0917511702008518	16.8648489061133	4.01845196752867	3.22621861072972	3.22588006401112	XP_020877290.1	AT5G17600.1	AT5G17600.1	0	GO:0016020; GO:0016567; GO:0016740; GO:0046872	AT5G17600.1	N0.HOG0004704	AT5G17600.1	OG0001502	AT3G03550.1, AT5G17600.1	AT5G17600.1	354	363	98	96	350	89.714	559	AT5G17600.1	90.857	350	27	4	6	353	4	350	0	576	98	354	363	ATL52	Arabidopsis Toxicos en Levadura 52	Chloroplast	protein_coding	RING/U-box superfamily protein
LOC9309906	25	4	7270222	7271440	0.141628264208909	0.00554976377410943	0.141628264208909	0.0655518659210896	19.5871724271616	3.47006185020859	3.22476184180329	3.22458977319373	XP_002871775.1	AT5G17610.1	AT5G17610.1	0	GO:0005783; GO:0009536	AT5G17610.1	N0.HOG0018124	AT5G17610.1	OG0012229	AT5G17610.1	AT5G17610.1	120	122	100	99	121	93.388	212	AT5G17610.1	93.388	121	7	1	1	120	1	121	1.01e-72	212	100	120	122			Extracellular	protein_coding	NULL
LOC9309907	26	4	7275769	7277421	0.2	0.0189318661328148	0.2	0.0605712667157489	9.27645149760288	2.37667369875446	3.22298294905484	3.22271914776638	XP_002871776.1	AT5G17630.1	AT5G17630.1	0	GO:0009536; GO:0009941; GO:0015120; GO:0015713; GO:0031969; GO:0035436; GO:0071917; GO:0016020; GO:0022857; GO:0055085	AT5G17630.1	N0.HOG0022952	AT5G17630.1	OG0016952	AT5G17630.1	AT5G17630.1	417	418	100	99	417	97.842	823	AT5G17630.1	97.842	417	9	0	1	417	1	417	0	823	100	417	418	XPT	xylulose 5-phosphate/phosphate translocator	Chloroplast	protein_coding	Nucleotide/sugar transporter family protein
LOC9307846	34	4	7277405	7279895	0.134634888438134	0.0117271266958248	0.134634888438134	0.0645083656006089	8.95697618066176	2.50185846173489	3.22240312617521	3.22202066894784	XP_002873840.1	AT5G17640.1	AT5G17640.1	0	GO:0009651; GO:0009737	AT5G17640.1	N0.HOG0020371	AT5G17640.1	OG0014406	AT5G17640.1	AT5G17640.1	432	433	100	99	432	96.991	870	AT5G17640.1	96.991	432	13	0	1	432	1	432	0	870	100	432	433	ASG1	Abiotic Stress Gene 1	Unknown	protein_coding	Protein of unknown function (DUF1005)
LOC9304904	160	5	2663	10422	0.14405762304922	0.00930405361476642	0.14405762304922	0.0359102884726916	9.61653378476613	1.37604693456297	3.43802909921961	3.43649179189322	XP_020872821.1	NA	NA	0	NA	NA	NA	NA	NA	NA	NA	NA	NA	NA	NA	NA	NA	NA	NA	NA	NA	NA	NA	NA	NA	NA	NA	NA	NA	NA	NA	NA	NA	NA	NA	NA	NA
LOC9304905	48	5	10465	13666	0.136221231473672	0.00209341803761769	0.160345173590207	0.0549434682895367	13.6006510086205	2.66417412132326	3.43484310526643	3.43425705775486	XP_002868833.1	NA	NA	0	NA	NA	NA	NA	NA	NA	NA	NA	NA	NA	NA	NA	NA	NA	NA	NA	NA	NA	NA	NA	NA	NA	NA	NA	NA	NA	NA	NA	NA	NA	NA	NA	NA
LOC9304906	27	5	13541	15283	0.1177969348659	0.00166774192706968	0.1177969348659	0.0337378808209441	13.2895373944789	1.32386309286639	3.43355910377154	3.43320004731015	XP_020872840.1	AT4G38140.1	AT4G38140.1	0	GO:0016020; GO:0016567; GO:0016740; GO:0046872	AT4G38140.1	N0.HOG0022589	AT4G38140.1	OG0016599	AT4G38140.1	AT4G38140.1	144	146	99	88	128	93.662	248	AT4G38140.1	93.662	142	9	0	1	142	1	142	3.48e-86	248	99	144	146	ATL100	Arabidopsis Toxicos en Levadura 100	Unknown	protein_coding	RING/U-box superfamily protein
LOC9302858	5	5	15385	16523	0.057601166605906	-0.0129222473045569	0.095448798988622	0.0526028594345301	4.54361406709539	1.67788760104783	3.43276824236297	3.43245398560686	XP_020872836.1	AT4G38150.1	AT4G38150.1	0	GO:0005515	AT4G38150.1	N0.HOG0022590	AT4G38150.1	OG0016600	AT4G38150.1	AT4G38150.1	335	303	90	99	302	92.384	576	AT4G38150.1	92.384	302	22	1	35	335	1	302	0	576	90	335	303			Mitochondrion	protein_coding	Pentatricopeptide repeat (PPR) superfamily protein
LOC9304908	29	5	16511	18563	0.0881219903691814	-0.018467479550602	0.139276763336914	0.0370031749837191	5.23585891332031	1.06163221364679	3.43232103403744	3.43193710787136	XP_020872839.1	AT4G38160.3	AT4G38160.3	0	GO:0003677; GO:0003690; GO:0003727; GO:0005737; GO:0006353; GO:0006355; GO:0009658; GO:0042651;GO:0003690; GO:0003723; GO:0005739; GO:0008033; GO:0009507	AT4G38160.3	N0.HOG0017841	AT4G38160.3	OG0011978	AT4G38160.3	AT4G38160.3	366	379	95	91	347	95.389	676	AT4G38160.3	95.389	347	13	1	1	347	1	344	0	676	95	366	379	mTERF6, PDE191	mitochondrial transcription termination factor 6, pigment defective 191	Unknown	protein_coding	Mitochondrial transcription termination factor family protein
LOC110226249	15	5	18738	21125	0.091688035524423	-0.00338983717384096	0.179736746769714	0.0489088837996646	21.0835391010432	2.79715125800686	3.43137233439633	3.4309760407317	XP_020872831.1	AT4G38170.1	AT4G38170.1	0	GO:0005634; GO:0006355; GO:0008270	AT4G38170.1	N0.HOG0024763	AT4G38170.1	OG0018706	AT4G38170.1	AT4G38170.1	537	546	99	97	533	94.371	1050	AT4G38170.1	94.371	533	27	1	5	537	16	545	0	1050	99	537	546	FRS9	FAR1-related sequence 9	Unknown	protein_coding	FAR1-related sequence 9
LOC110226248	14	5	20892	24154	0.0666498993963782	-0.00819308335885229	0.0952308196005675	0.0414969687923601	5.00044202286216	1.5599520345008	3.43026245603099	3.42971470487063	XP_020872827.1	AT4G38180.1	AT4G38180.1	0	GO:0005634; GO:0006355; GO:0008270	AT4G38180.1	N0.HOG0022591	AT4G38180.1	OG0016601	AT4G38180.1	AT4G38180.1	794	789	100	99	795	96.478	1604	AT4G38180.1	96.478	795	20	2	1	794	1	788	0	1604	100	794	789	FRS5	FAR1-related sequence 5	Nucleus	protein_coding	FAR1-related sequence 5
LOC9302860	11	5	39602	40829	0.107485144719187	-0.0165458380113441	0.126662696049236	0.0734662286793244	6.34445151239155	2.78016416911172	3.42266116718123	3.42237369509488	XP_002868837.1	AT4G38210.1	AT4G38210.1	0	GO:0005576; GO:0006949; GO:0009828; GO:0016020; GO:0009664	AT4G38210.1	N0.HOG0020038	AT4G38210.1	OG0014084	AT4G38210.1	AT4G38210.1	256	257	100	99	256	98.828	526	AT4G38210.1	98.828	256	3	0	1	256	1	256	0	526	100	256	257	ATEXP20, ATEXPA20, ATHEXP ALPHA 1.23, EXP20, EXPA20	expansin A20, EXPANSIN 20, expansin A20	Extracellular	protein_coding	expansin A20
LOC9304910	18	5	43095	48442	0.2375	0.0382618565490181	0.2375	0.0624954771655233	14.1131304053558	2.10955601408318	3.42119928450363	3.42073326271446	XP_002868838.2	AT4G38213.1	AT4G38213.1	0	GO:0016874	AT4G38213.1	N0.HOG0024764	AT4G38213.1	OG0018707	AT4G38213.1	AT4G38213.1	172	171	97	99	171	85.38	264	AT4G38213.1	85.38	171	19	5	7	172	1	170	8.43e-92	264	97	172	171			Mitochondrion	protein_coding	NULL
LOC110226171	24	5	50458	52298	0.141540291406482	0.0311440361735595	0.141540291406482	0.0666547484421284	11.3204048935977	3.05642006997459	3.41812394433782	3.41789298065429	XP_020872529.1	AT4G38225.3	AT4G38225.3	0	GO:0009507; GO:0016301; GO:0016310;GO:0016301	AT4G38225.3	N0.HOG0023985	AT4G38225.3	OG0017962	AT4G38225.3	AT4G38225.3	432	366	83	97	359	91.643	639	AT4G38225.3	91.643	359	24	3	11	368	11	364	0	640	83	432	366			Chloroplast	protein_coding	NULL
LOC9302861	32	5	51869	54842	0.105287569573284	0.0152296904411064	0.105287569573284	0.0405542449831605	7.9296237018487	1.41122736993651	3.41748591042426	3.41702869367244	XP_002868839.1	AT4G38230.2	AT4G38230.2	0	GO:0004672; GO:0005509; GO:0005524; GO:0005886; GO:0006468;GO:0004683; GO:0005516; GO:0005634; GO:0005737; GO:0009931; GO:0035556; GO:0044024; GO:0106310; GO:0006468	AT4G38230.2	N0.HOG0020039	AT4G38230.2	OG0014085	AT4G38230.2	AT4G38230.2	484	515	100	94	484	99.38	1000	AT4G38230.2	99.38	484	3	0	1	484	31	514	0	1000	100	484	515	ATCPK26, CPK26	ARABIDOPSIS THALIANA CALCIUM-DEPENDENT PROTEIN KINASE 26, calcium-dependent protein kinase 26	Cell_membrane	protein_coding	calcium-dependent protein kinase 26
LOC9302862	25	5	55037	58539	0.192952703975881	-0.00241999094331196	0.209959349593496	0.0667982089149927	18.961384593217	4.04281604277143	3.41623280847754	3.41524721310567	XP_020872524.1	NA	NA	0	NA	NA	NA	NA	NA	NA	NA	NA	NA	NA	NA	NA	NA	NA	NA	NA	NA	NA	NA	NA	NA	NA	NA	NA	NA	NA	NA	NA	NA	NA	NA	NA	NA
LOC9304913	15	5	58590	60201	0.0923076923076923	0.00471709406376444	0.0923076923076923	0.0375477180177408	4.20709531593084	0.953046675804183	3.414737520883	3.41442796865269	XP_020872525.1	AT4G38250.1	AT4G38250.1	0	GO:0005774; GO:0015175; GO:0015804; GO:0003333; GO:0015179; GO:0016020	AT4G38250.1	N0.HOG0015930	AT4G38250.1	OG0010200	AT4G38250.1	AT4G38250.1	438	437	100	99	438	96.575	843	AT4G38250.1	96.575	438	13	1	1	438	1	436	0	843	100	438	437	At4g38250	NULL	Cell_membrane	protein_coding	Transmembrane amino acid transporter family protein
LOC9302863	19	5	60131	61472	0.142440996373581	-0.0388722056450815	0.444444444444444	0.0781366164459481	12.6955804527184	2.96956163980995	3.41406315912227	3.41382983017282	XP_002868841.1	AT4G38260.1	AT4G38260.1	0		AT4G38260.1	N0.HOG0017842	AT4G38260.1	OG0011979	AT4G38260.1	AT4G38260.1	273	276	99	98	271	94.465	536	AT4G38260.1	94.465	271	15	0	1	271	1	271	0	536	99	273	276			Unknown	protein_coding	Protein of unknown function (DUF833)
LOC9302864	19	5	64923	66384	0.131665299425759	0.0213402712138033	0.131665299425759	0.0700474583242937	9.39388854040257	3.89744592486826	3.41209393926864	3.41188507063009	XP_020872533.1	AT2G45250.2, AT4G38280.1	AT4G38280.1	0	GO:0005739; GO:0070176	AT2G45250.2, AT4G38280.1	N0.HOG0017843	AT2G45250.2, AT4G38280.1	OG0011980	AT2G45250.2, AT4G38280.1	AT4G38280.1	163	171	88	91	155	80	226	AT4G38280.1	84.516	155	13	6	18	161	16	170	3.51e-81	237	88	163	171	LIN52A (AT2G45250), LIN52B (AT4G38280)	NULL	Chloroplast (AT2G45250.2), Nucleus (AT4G38280.1)	protein_coding	Integral membrane protein hemolysin-III homolog (AT2G45250.2), NULL (AT4G38280.1)
LOC9302865	32	5	69139	72534	0.179571619812584	-0.00355111035615819	0.179571619812584	0.0541450191778073	16.2735531522004	2.97284798279296	3.41030093035187	3.40978542462974	XP_002866792.1	AT4G38340.1	AT4G38340.1	0	GO:0003677; GO:0003700; GO:0005634; GO:0006355;GO:0003700; GO:0005515	AT4G38340.1	N0.HOG0022593	AT4G38340.1	OG0016603	AT4G38340.1	AT4G38340.1	693	768	100	91	697	93.831	1202	AT4G38340.1	93.831	697	38	4	1	693	72	767	0	1202	100	693	768	NLP3	NIN-like protein 3	Nucleus	protein_coding	Plant regulator RWP-RK family protein
LOC9302866	51	5	72685	81456	0.111421911421911	0.00974085942706247	0.172619047619048	0.0442844512041318	15.7537713744259	2.2665379985034	3.40885658525566	3.40711695051868	XP_020875711.1	AT4G38350.2	AT4G38350.2	0	GO:0000325; GO:0005319; GO:0005773; GO:0016020; GO:0048868; GO:0090153;GO:0005319; GO:0015918; GO:0032934	AT4G38350.2	N0.HOG0023986	AT4G38350.2	OG0017963	AT4G38350.2	AT4G38350.2	1272	1298	100	99	1297	94.295	2499	AT4G38350.2	94.295	1297	49	2	1	1272	1	1297	0	2499	100	1272	1298	AtNPC1-2	Niemann-Pick disease type C1-2	Chloroplast	protein_coding	Patched family protein
LOC9304915	27	5	81492	84394	0.0720430107526882	-0.0107107692484067	0.0948310948310949	0.0342321007355679	4.7794206390013	0.986799663371052	3.40516074875769	3.40474669790526	XP_002866793.1	AT4G38360.2	AT4G38360.2	0	GO:0005829; GO:0005886; GO:0007033; GO:0009705; GO:0012501; GO:0012505; GO:0016020; GO:0098876; GO:1900458	AT4G38360.2	N0.HOG0017844	AT4G38360.2	OG0011981	AT4G38360.2	AT4G38360.2	483	486	100	99	486	98.354	976	AT4G38360.2	98.354	486	4	3	1	483	1	485	0	976	100	483	486	LAZ1	LAZARUS 1	Unknown	protein_coding	Protein of unknown function (DUF300)
LOC9302867	9	5	84365	85812	0.110479041916168	-0.00633834693421984	0.142067695141607	0.0504600222816312	13.9534554317055	2.73835205105105	3.40390221851196	3.40359215592875	XP_002868843.1	AT4G38370.1	AT4G38370.1	0		AT4G38370.1	N0.HOG0022594	AT4G38370.1	OG0016604	AT4G38370.1	AT4G38370.1	225	226	100	99	225	95.111	449	AT4G38370.1	95.111	225	11	0	1	225	1	225	3.31e-163	449	100	225	226			Nucleus	protein_coding	Phosphoglycerate mutase family protein
LOC9304916	22	5	86225	89586	0.102485035370941	-0.00494849087811149	0.102485035370941	0.0488510134525749	5.70867619193346	1.92576971933978	3.40316229960173	3.40251849574798	XP_020872867.1	AT4G38380.1	AT4G38380.1	0	GO:0009507; GO:0015297; GO:0031969; GO:0042910;GO:0015297; GO:0016020; GO:0042910; GO:0055085	AT4G38380.1	N0.HOG0022595	AT4G38380.1	OG0016605	AT4G38380.1	AT4G38380.1	558	561	100	99	563	93.606	1053	AT4G38380.1	93.606	563	28	2	1	558	1	560	0	1053	100	558	561			Unknown	protein_coding	MATE efflux family protein
LOC9304917	27	5	89800	93009	0.146804522643449	0.00307738166582733	0.148814346675309	0.0477974445671431	13.1723876320013	1.92489523063316	3.40152879916335	3.40113505417016	XP_020872868.1	AT4G38390.1	AT4G38390.1	0	GO:0006004; GO:0016020; GO:0016757	AT4G38390.1	N0.HOG0022596	AT4G38390.1	OG0016606	AT4G38390.1	AT4G38390.1	553	552	100	99	555	95.315	1088	AT4G38390.1	95.315	555	20	3	1	553	1	551	0	1088	100	553	552	RHS17	root hair specific 17	Nucleus	protein_coding	root hair specific 17
LOC9302868	13	5	92904	94189	0.128663909368819	0.0133455315653166	0.128663909368819	0.04241474022054	20.5622487112357	2.62828836838227	3.40035252852559	3.40011053559845	XP_020872872.1	AT4G38400.1	AT4G38400.1	0	GO:0005576; GO:0009653; GO:0009828; GO:0019953; GO:0009505; GO:0009506	AT4G38400.1	N0.HOG0005745	AT3G45960.2, AT3G45970.1, AT4G38400.1	OG0002043	AT3G45960.2, AT3G45970.1, AT4G38400.1	AT4G38400.1	264	266	94	99	247	92.803	451	AT4G38400.1	93.522	247	16	0	18	264	19	265	7.51e-163	451	94	264	266	ATEXLA2, ATEXPL2, ATHEXP BETA 2.2, EXLA2, EXPL2	expansin-like A2, expansin-like A2, EXPANSIN L2	Extracellular	protein_coding	expansin-like A2
LOC110226086	15	5	94218	95351	0.0958630324166131	-0.0259398896189852	0.137123916369199	0.0590523319926062	9.08843073691431	2.46613375537799	3.3998447737881	3.39965110878214	XP_020872325.1	AT4G38405.1	AT4G38405.1	0	GO:0016020	AT4G38405.1	N0.HOG0036228	AT4G38405.1	OG0029811	AT4G38405.1	AT4G38405.1	67	47	54	74	36	75	51.2	AT4G38405.1	75	36	8	1	25	60	8	42	5.75e-11	51.2	54	67	47			Mitochondrion	protein_coding	NULL
LOC9304918	8	5	95345	96384	0.0346430245274176	-0.015144857388626	0.0911062244212327	0.0337992423453181	4.1345099760935	1.2728886138108	3.39939338984795	3.3993141053654	XP_020872873.1	AT4G38410.1	AT4G38410.1	0	GO:0005829; GO:0009409; GO:0009414; GO:0009737; GO:0046872	AT4G38410.1	N0.HOG0020040	AT4G38410.1	OG0014086	AT4G38410.1	AT4G38410.1	164	164	100	99	164	85.976	233	AT4G38410.1	85.976	164	22	1	1	164	1	163	6.29e-80	233	100	164	164			Unknown	protein_coding	Dehydrin family protein
LOC9302871	66	5	104039	109657	0.0820720341952211	-0.0120004448218539	0.104010025062657	0.0399535753051969	9.24069902654203	1.41160429486024	3.39565537964233	3.39456055246968	XP_020874959.1	AT4G38440.1	AT4G38440.1	0	GO:0005634; GO:0005737; GO:0030154	AT4G38440.1	N0.HOG0017845	AT4G38440.1	OG0011982	AT4G38440.1	AT4G38440.1	1447	1466	100	99	1474	90.163	2577	AT4G38440.1	90.163	1474	109	6	1	1447	1	1465	0	2622	100	1447	1466	IYO	MINIYO	Nucleus	protein_coding	NULL
LOC9302872	20	5	109716	110985	0.216737305742541	-0.022619630028157	0.216737305742541	0.085504430261309	21.3826566939951	5.52115096233491	3.39335127549638	3.39310059247281	XP_002866799.2	AT4G38460.1	AT4G38460.1	0	GO:0004659; GO:0009507; GO:0009535; GO:0042651; GO:0043693; GO:0046872; GO:0008299	AT4G38460.1	N0.HOG0020041	AT4G38460.1	OG0014087	AT4G38460.1	AT4G38460.1	320	327	100	99	329	88.754	523	AT4G38460.1	88.754	329	25	5	1	320	1	326	0	541	100	320	327	AtSSU, GGPPS12, GGR, SSU	geranyl(geranyl)diphosphate synthase 12, geranylgeranyl reductase, small subunit of Heterodimeric geranyl(geranyl)diphosphate synthase	Chloroplast	protein_coding	geranylgeranyl reductase
LOC9302873	53	5	114429	118706	0.224687933425798	0.0051713858756448	0.405128205128205	0.0778571414361942	25.4005636404883	4.05568858437923	3.39140794445337	3.39057665048969	XP_002866800.1	AT4G38470.1	AT4G38470.1	0	GO:0004672; GO:0005524; GO:0006468;GO:0004674; GO:0004712; GO:0005829; GO:0009658; GO:0009737; GO:0044024; GO:0071456; GO:0106310; GO:0004674; GO:0006468	AT4G38470.1	N0.HOG0012501	AT4G38470.1	OG0007006	AT4G38470.1	AT4G38470.1	565	576	99	99	570	94.561	1118	AT4G38470.1	94.561	570	24	2	3	565	6	575	0	1118	99	565	576	STY46	serine/threonine/tyrosine kinase 46	Unknown	protein_coding	ACT-like protein tyrosine kinase family protein
LOC9302874	21	5	118884	121160	0.157430689351141	-0.0262272778044721	0.264020601700458	0.0803278385684155	48.7684390712379	6.14404747675257	3.38952557738379	3.38914384667223	XP_020873874.1	NA	NA	0	NA	NA	NA	NA	NA	NA	NA	NA	NA	NA	NA	NA	NA	NA	NA	NA	NA	NA	NA	NA	NA	NA	NA	NA	NA	NA	NA	NA	NA	NA	NA	NA	NA
LOC9302875	17	5	121294	122294	0.176682170542636	0.0188609992515413	0.176682170542636	0.0535988290723545	16.4113409256963	2.83990837793818	3.38846831176263	3.38825572385372	XP_002866802.1	AT4G38490.1	AT4G38490.1	0	GO:0006605; GO:0006886; GO:0009528; GO:0071806; GO:0090351	AT4G38490.1	N0.HOG0022598	AT4G38490.1	OG0016608	AT4G38490.1	AT4G38490.1	147	154	100	99	153	86.275	256	AT4G38490.1	86.275	153	15	2	1	147	1	153	1.79e-89	256	100	147	154	SECE2	NULL	Mitochondrion	protein_coding	NULL
LOC110226454	12	5	122257	123031	0.176682170542636	0.0165165110818402	0.176682170542636	0.0797514194648624	16.4113409256963	3.98139453679367	3.38816432701847	3.38807528203676	XP_020873877.1	AT4G38495.1	AT4G38495.1	0	GO:0005634; GO:0005737; GO:0006281; GO:0006310; GO:0006338; GO:0009873; GO:0010104; GO:0010628; GO:0031011; GO:0040029	AT4G38495.1	N0.HOG0020042	AT4G38495.1	OG0014088	AT4G38495.1	AT4G38495.1	116	125	100	95	119	88.235	217	AT4G38495.1	88.235	119	11	1	1	116	6	124	8.08e-75	217	100	116	125	EEN, EEN, EEN	EIN6 ENHANCER, ENHANCER OF ETHYLENE INSENSITIVITY	Nucleus	protein_coding	NULL
LOC9302876	25	5	123046	125507	0.145098973219011	0.0353466272941357	0.145098973219011	0.0612654998017732	17.796271304557	4.09295887344825	3.38780856465306	3.38743685143981	XP_020873871.1	AT4G38500.1	AT4G38500.1	0	GO:0000138; GO:0005768; GO:0005794; GO:0005802; GO:0016020	AT4G38500.1	N0.HOG0023987	AT4G38500.1	OG0017964	AT4G38500.1	AT4G38500.1	497	500	100	99	499	97.194	1001	AT4G38500.1	97.194	499	12	1	1	497	1	499	0	1001	100	497	500			Mitochondrion	protein_coding	Protein of unknown function (DUF616)
LOC9302877	40	5	125486	129751	0.311713286713287	-0.0167186339393311	0.311713286713287	0.149948913444726	62.4425258479053	19.5660952594597	3.38679973616146	3.3860018179642	XP_020873872.1	AT4G38510.5	AT4G38510.5	0	GO:0000325; GO:0005524; GO:0005773; GO:0005794; GO:0005886; GO:0009941; GO:0030835; GO:0033180; GO:0046034; GO:0046961; GO:0051015; GO:0051017; GO:0051693;GO:0005524; GO:0005774; GO:0007035; GO:1902600	AT4G38510.5	N0.HOG0003153	AT4G38510.5	OG0000770	AT1G20260.1, AT1G76030.1, AT4G38510.5	AT4G38510.5	488	495	100	98	488	99.59	995	AT4G38510.5	99.59	488	1	1	1	488	8	494	0	995	100	488	495	AtVAB2, VAB2	V-ATPase B subunit 2	Cell_membrane	protein_coding	ATPase, V1 complex, subunit B protein
LOC9304919	25	5	131056	133463	0.229344729344729	0.00482284146519004	0.229344729344729	0.0845575625426877	18.6692868024837	5.003952426717	3.38435366111851	3.38390421466354	XP_020873875.1	AT4G38520.1	AT4G38520.1	0	GO:0006470; GO:0017018; GO:0046872; GO:0043169; GO:0004722	AT4G38520.1	N0.HOG0015932	AT4G38520.1	OG0010202	AT4G38520.1	AT4G38520.1	399	401	100	99	399	98.246	819	AT4G38520.1	98.246	399	7	0	1	399	1	399	0	819	100	399	401	APD6, PP2C.D5	Arabidopsis Pp2c clade D 6, Protein Phosphatase 2C.D5	Unknown	protein_coding	Protein phosphatase 2C family protein
LOC9304920	4	5	134368	135119	0.0902777777777778	-0.0389951141853316	0.102272727272727	0.0841340030742205	1.05976712721351	0.642120298074686	3.38288133940437	3.38285513742264	XP_020875307.1	AT1G19740.1	AT1G19740.1	0	GO:0006508; GO:0008233; GO:0009507; GO:0009570; GO:0120194; GO:1903123; GO:2000295							NA	NA	NA	NA	NA	NA	NA	AT1G19740.1	97.268	183	5	0	18	200	66	248	3.44e-130	367	88	208	279	LCP1	Lon domain-containing protein 1	Chloroplast	protein_coding	ATP-dependent protease La (LON) domain protein
LOC9302878	36	5	138466	141086	0.109605662285136	-0.0156566596370723	0.223826780877077	0.0746569538354131	35.8081545274061	5.32753298122072	3.38128625462047	3.38080092061369	XP_020875565.1	NA	NA	0	NA	NA	NA	NA	NA	NA	NA	NA	NA	NA	NA	NA	NA	NA	NA	NA	NA	NA	NA	NA	NA	NA	NA	NA	NA	NA	NA	NA	NA	NA	NA	NA	NA
LOC110226937	29	5	140984	143409	0.107361846364779	-0.0562530085670539	0.158333333333333	0.0775960533270511	14.474412073481	3.46954761714981	3.38027575588303	3.37981041963058	NA	NA	NA	0	NA	NA	NA	NA	NA	NA	NA	NA	NA	NA	NA	NA	NA	NA	NA	NA	NA	NA	NA	NA	NA	NA	NA	NA	NA	NA	NA	NA	NA	NA	NA	NA	NA
LOC9302879	25	5	141201	143006	0.107361846364779	-0.0617253141324709	0.158333333333333	0.0837705451467432	14.474412073481	3.78916347817538	3.38019349627506	3.37980476325663	XP_020875567.1	AT4G38540.1	AT4G38540.1	0	GO:0002239; GO:0004497; GO:0005886; GO:0071949	AT4G38540.1	N0.HOG0008674	AT4G38540.1, AT5G05320.1	OG0003760	AT4G38540.1, AT5G05320.1		NA	NA	NA	NA	NA	NA	NA	AT4G38540.1	90.37	405	36	1	1	402	1	405	0	726	99	407	408			Mitochondrion	protein_coding	FAD/NAD(P)-binding oxidoreductase family protein
LOC110226936	18	5	143110	145086	0.150859950859951	-0.0188182780221694	0.198028363887928	0.078770183740363	19.1731713325924	4.63429911443056	3.37935753822863	3.37908030061589	XP_020875569.1	AT4G38540.1	AT4G38540.1	0	GO:0002239; GO:0004497; GO:0005886; GO:0071949	AT4G38540.1	N0.HOG0008674	AT4G38540.1, AT5G05320.1	OG0003760	AT4G38540.1, AT5G05320.1	AT4G38540.1	404	408	100	99	407	93.857	750	AT4G38540.1	93.857	407	22	1	1	404	1	407	0	750	100	404	408			Mitochondrion	protein_coding	FAD/NAD(P)-binding oxidoreductase family protein
LOC9302880	42	5	145681	149131	0.248033044846578	-0.00840429601397781	0.248033044846578	0.0675624885912624	37.0699324056374	4.13757972820167	3.37832741410249	3.37764438297045	XP_020875564.1	NA	NA	0	NA	NA	NA	NA	NA	NA	NA	NA	NA	NA	NA	NA	NA	NA	NA	NA	NA	NA	NA	NA	NA	NA	NA	NA	NA	NA	NA	NA	NA	NA	NA	NA	NA
LOC9302881	44	5	149287	151691	0.180121032199132	0.0241574100123812	0.180121032199132	0.0881133112337497	18.8570045610158	4.44952424777299	3.37683254406941	3.37635674227377	XP_020875566.1	AT4G38560.2	AT4G38560.2	0		AT4G38560.2	N0.HOG0026780	AT4G38560.2	OG0020565	AT4G38560.2	AT4G38560.2	518	524	100	99	523	87.763	896	AT4G38560.2	87.763	523	59	2	1	518	1	523	0	896	100	518	524			Nucleus	protein_coding	Arabidopsis phospholipase-like protein (PEARLI 4) family
LOC9302882	44	5	151645	153879	0.260166840458811	-0.0456590070155497	0.321428571428571	0.115180511995339	21.7686974606088	6.16124957893926	3.37578112430871	3.37538833183367	XP_020875572.1	AT4G38570.1	AT4G38570.1	0	GO:0003881; GO:0005783; GO:0005794; GO:0008654; GO:0016020; GO:0046872; GO:0006661; GO:0016780	AT4G38570.1	N0.HOG0006265	AT4G38570.1	OG0002305	AT1G68000.1, AT4G38570.1		NA	NA	NA	NA	NA	NA	NA	AT4G38570.1	92.694	219	16	0	2	220	7	225	3.97e-140	390	99	220	226	PIS2	probable CDP-diacylglycerol--inositol 3-phosphatidyltransferase 2	Unknown	protein_coding	probable CDP-diacylglycerol--inositol 3-phosphatidyltransferase 2
LOC9304921	13	5	153952	155445	0.183392608628421	-0.0153565422078336	0.236568889694881	0.0814953622453204	21.3870916857206	4.92536391459184	3.37476227434204	3.37459287286901	XP_020875570.1	AT4G38580.1	AT4G38580.1	0	GO:0005507; GO:0005886; GO:0009506; GO:0010286; GO:0031965; GO:0032791; GO:0046870; GO:0046872	AT4G38580.1	N0.HOG0020043	AT4G38580.1	OG0014089	AT4G38580.1	AT4G38580.1	153	154	100	99	153	96.078	305	AT4G38580.1	96.078	153	6	0	1	153	1	153	1.71e-108	305	100	153	154	ATFP6, AtHMP40, FP6, HIPP26	farnesylated protein 6, HEAVY METAL ASSOCIATED PROTEIN 40, farnesylated protein 6, HEAVY METAL ASSOCIATED ISOPRENYLATED PLANT PROTEIN 26	Nucleus	protein_coding	farnesylated protein 6
LOC9302883	62	5	155502	158309	0.226354909572387	0.0129302170610866	0.227272727272727	0.0848296050480533	21.1816377725725	4.07572751670914	3.37427456255471	3.37376531941265	XP_020875571.1	AT4G38590.2	AT4G38590.2	0	GO:0000398; GO:0004565; GO:0005975; GO:0030246; GO:0048046;GO:0004565; GO:0005773; GO:0004553	AT4G38590.2	N0.HOG0024765	AT4G38590.2	OG0018708	AT4G38590.2		NA	NA	NA	NA	NA	NA	NA	AT4G38590.2	83.854	384	44	5	1	376	1	374	0	655	62	607	1053	BGAL14	beta-galactosidase 14	Extracellular	protein_coding	beta-galactosidase 14
LOC9302884	32	5	158313	161900	0.127684613121506	-0.0205184575608661	0.194940821536319	0.066952529799079	15.3519659980832	2.86523048357572	3.37306488700001	3.37232812589834	XP_020875562.1	AT4G03430.1	AT4G03430.1	0	GO:0000398; GO:0005634; GO:0005681; GO:0009409; GO:0009845; GO:0015030; GO:0080188; GO:2000636; GO:0005515; GO:0006396; GO:0000244; GO:0046540; GO:0071013							NA	NA	NA	NA	NA	NA	NA	AT4G03430.1	70.805	1031	210	14	1	943	1	1028	0	1404	99	945	1030	EMB2770, STA1, STA1	EMBRYO DEFECTIVE 2770, STABILIZED 1, STARIK 1	Nucleus	protein_coding	pre-mRNA splicing factor-related
LOC9302885	48	5	161739	170458	0.166977225672878	-0.0272782706431139	0.195854585287372	0.076142628649823	24.0582996172934	5.3031090688469	3.37167900050845	3.36983040372208	XP_002868849.1	AT4G38600.1	AT4G38600.1	0	GO:0004842; GO:0005886; GO:0006511; GO:0010091; GO:0016567; GO:0042023; GO:0061630;GO:0006511; GO:0016874; GO:0000209; GO:0043161; GO:0061630; GO:0005515	AT4G38600.1	N0.HOG0016372	AT4G38600.1	OG0010600	AT4G38600.1	AT4G38600.1	1884	1889	100	99	1893	96.566	3687	AT4G38600.1	96.566	1893	51	7	1	1884	1	1888	0	3687	100	1884	1889	KAK, UPL3	KAKTUS, UBIQUITIN-PROTEIN LIGASE 3	Nucleus	protein_coding	HEAT repeat ;HECT-domain (ubiquitin-transferase)
LOC9304922	11	5	175435	177106	0.0980542754736303	-0.00689930933582199	0.0980542754736303	0.0546318206713212	3.98063501498297	1.54641331039179	3.36570369599076	3.36547840260207	XP_020872408.1	AT4G38620.1	AT4G38620.1	0	GO:0000976; GO:0003677; GO:0003700; GO:0005634; GO:0010224; GO:0045892; GO:1903086; GO:2000762	AT4G38620.1	N0.HOG0015933	AT4G38620.1	OG0010203	AT4G38620.1	AT4G38620.1	282	283	100	99	285	95.789	555	AT4G38620.1	95.789	285	6	2	1	282	1	282	0	555	100	282	283	ATMYB4, MYB4	myb domain protein 4, myb domain protein 4	Nucleus	protein_coding	myb domain protein 4
LOC9302886	30	5	179058	181560	0.13413286619054	-0.020276442735331	0.181818181818182	0.0746345706210081	12.4839235108223	3.07228180940721	3.36443305646264	3.36396946580909	XP_020872407.1	AT4G38630.1	AT4G38630.1	0	GO:0000502; GO:0001653; GO:0005634; GO:0005886; GO:0006974; GO:0009408; GO:0009555; GO:0009651; GO:0009733; GO:0009735; GO:0009737; GO:0009744; GO:0010029; GO:0010150; GO:0030163; GO:0031593; GO:0043161; GO:0043248; GO:0048366; GO:0048455; GO:0048528; GO:0048767; GO:0051788; GO:0005829; GO:0008540	AT4G38630.1	N0.HOG0015934	AT4G38630.1	OG0010204	AT4G38630.1	AT4G38630.1	385	387	100	99	386	98.187	764	AT4G38630.1	98.187	386	6	1	1	385	1	386	0	764	100	385	387	ATMCB1, MBP1, MCB1, RPN10	MULTIUBIQUITIN CHAIN BINDING PROTEIN 1, MULTIUBIQUITIN-CHAIN-BINDING PROTEIN 1, regulatory particle non-ATPase 10	Cytoplasm	protein_coding	regulatory particle non-ATPase 10
LOC9304923	21	5	181606	184155	0.0781163871170958	-0.0208618511387606	0.145105244965161	0.0612504537699792	11.7668190955836	3.27742339741583	3.36337495571856	3.3629086191013	XP_002868851.1	AT4G38640.1	AT4G38640.1	0	GO:0005886; GO:0022857; GO:0055085; GO:0016020	AT4G38640.1	N0.HOG0022599	AT4G38640.1	OG0016609	AT4G38640.1	AT4G38640.1	553	557	100	99	556	95.504	1081	AT4G38640.1	95.504	556	22	1	1	553	1	556	0	1081	100	553	557			Cell_membrane	protein_coding	Plasma-membrane choline transporter family protein
LOC9304924	48	5	184464	187928	0.220925806083216	-0.0101677293074287	0.220925806083216	0.0623973301485449	22.5369035891507	2.9244737134753	3.36213897379177	3.36130729575032	XP_020874422.1	AT4G38650.1	AT4G38650.1	0	GO:0000272; GO:0031176; GO:0004553; GO:0005975	AT4G38650.1	N0.HOG0022600	AT4G38300.1, AT4G38650.1	OG0016610	AT4G38300.1, AT4G38650.1	AT4G38650.1	591	563	99	99	589	91.002	1095	AT4G38650.1	91.002	589	26	1	3	591	1	562	0	1095	99	591	563			Extracellular	protein_coding	Glycosyl hydrolase family 10 protein
LOC9302887	36	5	188193	190243	0.185320228281547	0.00370230276280094	0.185320228281547	0.0739534266639547	12.495389693681	3.42000332326821	3.36063241203776	3.36014592973696	XP_002868852.1	AT4G38660.1	AT4G38660.1	0		AT4G38660.1	N0.HOG0022601	AT4G38660.1	OG0016611	AT4G38660.1	AT4G38660.1	345	346	100	99	345	92.174	621	AT4G38660.1	92.174	345	26	1	1	345	2	345	0	621	100	345	346			Extracellular	protein_coding	Pathogenesis-related thaumatin superfamily protein
LOC9304925	40	5	191385	193472	0.3125	-0.0131184815975079	0.3125	0.091816942948839	31.587619168171	5.25775497401705	3.35928619388507	3.35881283577299	XP_020874366.1	NA	NA	0	NA	NA	NA	NA	NA	NA	NA	NA	NA	NA	NA	NA	NA	NA	NA	NA	NA	NA	NA	NA	NA	NA	NA	NA	NA	NA	NA	NA	NA	NA	NA	NA	NA
LOC9304926	10	5	193888	194962	0.134515890613452	-0.0621292457543983	0.195317959468903	0.0935384180895731	10.0757678691017	3.85032047579634	3.35824855365261	3.35807668535495	XP_002868854.1	AT4G38680.1	AT4G38680.1	0	GO:0003676; GO:0003690; GO:0003697; GO:0003729; GO:0005634; GO:0005730; GO:0005737; GO:0005829; GO:0005886; GO:0008270; GO:0009269; GO:0009409; GO:0009414; GO:0009631; GO:0009737; GO:0010228; GO:0031982; GO:0032508; GO:0043457; GO:0048316; GO:0048443	AT4G38680.1	N0.HOG0006642	AT2G21060.1, AT4G38680.1	OG0002508	AT2G21060.1, AT4G38680.1	AT4G38680.1	195	204	100	99	203	79.31	187	AT4G38680.1	79.31	203	34	2	1	195	1	203	1.38e-60	187	100	195	204	ATCSP2, CSDP2, CSP2, GRP2	ARABIDOPSIS THALIANA COLD SHOCK PROTEIN 2, COLD SHOCK DOMAIN PROTEIN 2, COLD SHOCK PROTEIN 2, glycine rich protein 2	Unknown	protein_coding	glycine rich protein 2
LOC9302888	45	5	197352	199230	0.166497570352966	-0.00804785615060998	0.203616583357836	0.0778052361948093	35.7967108218604	5.15618812190703	3.35680838417102	3.35640156795755	XP_002868855.1	AT4G38690.1	AT4G38690.1	0	GO:0005886; GO:0006629; GO:0008081	AT4G38690.1	N0.HOG0023989	AT4G38690.1	OG0017966	AT4G38690.1	AT4G38690.1	318	319	100	99	318	97.484	649	AT4G38690.1	97.484	318	8	0	1	318	1	318	0	649	100	318	319			Extracellular	protein_coding	PLC-like phosphodiesterases superfamily protein
LOC9304928	28	5	199798	201019	0.161111111111111	-0.0195624473672544	0.161111111111111	0.0602046210182767	8.83027350445614	1.87909809405881	3.35578201809803	3.35551286991012	XP_002868856.1	AT4G38700.1	AT4G38700.1	0	GO:0009699; GO:0048046	AT4G38700.1	N0.HOG0023990	AT4G38700.1	OG0017967	AT4G38700.1	AT4G38700.1	191	191	100	99	191	87.958	348	AT4G38700.1	87.958	191	22	1	1	191	1	190	1.15e-124	348	100	191	191	DIR15	DIRIGENT PROTEIN 15	Extracellular	protein_coding	Disease resistance-responsive (dirigent-like protein) family protein
LOC9304929	44	5	201732	203842	0.114403453689168	-0.00700804166104609	0.153631501433997	0.0629185329493421	10.7907627026862	2.71896858843169	3.35497403666954	3.35453098497855	XP_020874400.1	AT4G38710.2	AT4G38710.2	0	GO:0003729; GO:0003743; GO:0005634; GO:0005886; GO:0042803	AT4G38710.2	N0.HOG0020044	AT4G38710.2	OG0014090	AT4G38710.2	AT4G38710.2	419	466	100	96	448	81.76	558	AT4G38710.2	81.76	466	37	6	1	419	1	465	0	597	100	419	466			Cytoplasm	protein_coding	glycine-rich protein
LOC9304930	106	5	204007	208705	0.2	-0.0173031326545094	0.232900432900433	0.0818055239051783	21.6900855281844	4.39142398853082	3.35398608625103	3.35294264742922	XP_020874401.1	AT4G38730.1	AT4G38730.1	0	GO:0005769; GO:0005886; GO:0015095; GO:0015693; GO:0016020	AT4G38730.1	N0.HOG0023991	AT4G38730.1	OG0017968	AT4G38730.1	AT4G38730.1	326	327	100	99	326	98.773	659	AT4G38730.1	98.773	326	4	0	1	326	1	326	0	659	100	326	327	AVI2H, ENOR3L1	ANTIVIRAL RNAI-DEFECTIVE 2H	Chloroplast	protein_coding	Protein of unknown function (DUF803)
LOC9304931	20	5	207123	207942	0.144368231046931	-0.0575248273071899	0.144368231046931	0.103879202576444	14.8589406207366	6.33509330615463	3.35272797356677	3.35255593824453	XP_020874403.1	AT4G38740.1	AT4G38740.1	0	GO:0000413; GO:0001932; GO:0003755; GO:0005829; GO:0005886; GO:0006457; GO:0007165; GO:0009416; GO:0009585; GO:0009626; GO:0009704; GO:0009742; GO:0009785; GO:0048046; GO:0005737; GO:0016018	AT4G38740.1	N0.HOG0006933	AT2G21130.1, AT4G38740.1	OG0002678	AT2G21130.1, AT4G38740.1	AT4G38740.1	172	173	100	99	172	97.093	347	AT4G38740.1	97.093	172	5	0	1	172	1	172	1.01e-124	347	100	172	173	ROC1	rotamase CYP 1	Cytoplasm	protein_coding	rotamase CYP 1
LOC9304933	169	5	208451	219551	0.148879479202673	-0.0245439637740754	0.232900432900433	0.0796039542686624	21.6900855281844	5.26462180208034	3.35215424411832	3.35002241001851	XP_020874399.1	AT4G38760.1	AT4G38760.1	0	GO:0017056; GO:0006405; GO:0006606; GO:0044611	AT4G38760.1	N0.HOG0017846	AT4G38760.1	OG0011983	AT4G38760.1	AT4G38760.1	1964	1966	100	99	1965	94.962	3762	AT4G38760.1	94.962	1965	98	1	1	1964	1	1965	0	3762	100	1964	1966			Nucleus	protein_coding	Protein of unknown function (DUF3414)
LOC9304934	15	5	220288	222188	0.1125	-0.0240254995724154	0.153972114910733	0.0612099637444113	13.3710783441388	2.19480059157345	3.3471017504311	3.34675450631951	XP_020872879.1	AT4G38770.1	AT4G38770.1	0	GO:0005576	AT4G38770.1	N0.HOG0006676	AT4G38770.1	OG0002531	AT4G38770.1		NA	NA	NA	NA	NA	NA	NA	AT2G21140.1	54.636	302	90	10	1	279	1	278	7.9e-78	245	58	482	322	ATPRP4, PRP4	ARABIDOPSIS THALIANA PROLINE-RICH PROTEIN 4, proline-rich protein 4	Unknown	protein_coding	proline-rich protein 4
LOC9304935	213	5	225098	234779	0.164696223316913	-0.0372135630089379	0.183223716501423	0.0646731525027896	34.8380195630695	5.09425297624913	3.34521938336152	3.34327436638961	XP_020873107.1	AT4G38780.1	AT4G38780.1	0	GO:0000398; GO:0003729; GO:0005681; GO:0005829; GO:0005886; GO:0008237; GO:0009506; GO:0017070; GO:0030623; GO:0005515; GO:0008233; GO:0003723; GO:0000244; GO:0005682; GO:0030619; GO:0030620; GO:0071013; GO:0097157	AT4G38780.1	N0.HOG0006751	AT4G38780.1	OG0002572	AT1G80070.1, AT4G38780.1	AT4G38780.1	2264	2333	99	97	2267	96.339	4569	AT4G38780.1	96.339	2267	70	1	11	2264	66	2332	0	4569	99	2264	2333			Nucleus	protein_coding	Pre-mRNA-processing-splicing factor
LOC110226314	2	5	234791	234969	0.0839160839160839	0.0380465601608911	0.0839160839160839	0.0458695237551928	2.14135675889238	1.08186018386086	3.34115191716258	3.34114252202969	XP_020873109.1	AT4G38781.1	AT4G38781.1	0		AT4G38781.1	N0.HOG0036243	AT4G38781.1	OG0029826	AT4G38781.1	AT4G38781.1	51	51	96	92	49	75.51	68.9	AT4G38781.1	75.51	49	10	1	2	50	4	50	4.21e-18	68.9	96	51	51			Unknown	protein_coding	NULL
LOC9304936	18	5	235151	236992	0.189151499122406	-0.00707176690957552	0.209461792708796	0.105497966054835	24.1683121689028	7.90031212478341	3.34094981741509	3.34060157115599	XP_020872801.1	AT4G38790.1	AT4G38790.1	0	GO:0005789; GO:0006621; GO:0015031; GO:0046923; GO:0016020	AT4G38790.1	N0.HOG0007565	AT4G38790.1	OG0003052	AT2G21190.1, AT4G38790.1	AT4G38790.1	273	274	100	99	273	97.802	546	AT4G38790.1	97.802	273	6	0	1	273	1	273	0	546	100	273	274			Unknown	protein_coding	ER lumen protein retaining receptor family protein
LOC9304937	18	5	239152	242856	0.102694924123496	0.000919035906528751	0.130578761195153	0.0498653111164508	6.69924371120627	1.94268541100935	3.33930713062455	3.33868941803547	XP_020872800.1	AT4G38810.2	AT4G38810.2	0	GO:0004860; GO:0005509; GO:0005634; GO:0005737; GO:0005829; GO:0005886	AT4G38810.2	N0.HOG0023992	AT4G38810.2	OG0017969	AT4G38810.2	AT4G38810.2	375	376	99	99	374	95.187	728	AT4G38810.2	95.187	374	18	0	1	374	1	374	0	728	99	375	376	SCS, SCS-A, SCS-B	CALCIUM SENSOR	Nucleus	protein_coding	Calcium-binding EF-hand family protein
LOC9302890	9	5	247929	248546	0.222833672745578	-0.0304968037425967	0.222833672745578	0.130272652731039	29.1095480522066	12.9203434466905	3.33568729031261	3.33556861006604	XP_020874687.1	AT4G38825.1	AT4G38825.1	0	GO:0009733	AT4G38825.1	N0.HOG0027545	AT4G38825.1	OG0021268	AT4G38825.1	AT4G38825.1	89	90	100	99	89	95.506	176	AT4G38825.1	95.506	89	4	0	1	89	1	89	1.1e-59	176	100	89	90	SAUR13	SMALL AUXIN UPREGULATED RNA 13	Mitochondrion	protein_coding	SAUR-like auxin-responsive protein family
LOC9302891	42	5	248613	253134	0.150833333333333	-0.00160455790944369	0.198028673835125	0.077610314725645	27.0057918058117	4.93030409218917	3.33537578946214	3.33471162813141	XP_002866818.1	AT4G38830.1	AT4G38830.1	0	GO:0004674; GO:0005524; GO:0006468; GO:0016020; GO:0106310; GO:0004672; GO:0005886	AT4G38830.1	N0.HOG0020046	AT4G38830.1	OG0014092	AT4G38830.1	AT4G38830.1	651	666	98	98	654	90.673	1172	AT4G38830.1	90.673	654	45	2	13	651	13	665	0	1189	98	651	666	CRK26	cysteine-rich RLK (RECEPTOR-like protein kinase) 26	Extracellular	protein_coding	cysteine-rich RLK (RECEPTOR-like protein kinase) 26
LOC9302892	3	5	251466	252041	0.0111789938905499	-0.0732735648124431	0.198028673835125	0.080726227406143	27.0057918058117	9.11365601894901	3.33420536468485	3.3341626342286	XP_020874686.1	AT4G38840.1	AT4G38840.1	0	GO:0005886; GO:0009409; GO:0009733	AT4G38840.1	N0.HOG0022867	AT4G38840.1	OG0016871	AT4G38840.1	AT4G38840.1	98	100	100	99	99	94.949	189	AT4G38840.1	94.949	99	4	1	1	98	1	99	2.43e-64	189	100	98	100	SAUR14	SMALL AUXIN UPREGULATED RNA 14	Chloroplast	protein_coding	SAUR-like auxin-responsive protein family
LOC9304939	2	5	252658	253272	0.0766787658802178	0.0559457659188323	0.0766787658802178	0.0559457659188323	2.27200477052378	1.42935631359911	3.33366044697726	3.33363038255202	XP_002866819.1	AT4G38850.1	AT4G38850.1	0	GO:0005886; GO:0009733; GO:0009734	AT4G38850.1	N0.HOG0025887	AT4G38850.1	OG0019760	AT4G38850.1	AT4G38850.1	89	90	100	99	89	96.629	182	AT4G38850.1	96.629	89	3	0	1	89	1	89	7.37e-62	182	100	89	90	ATSAUR15, SAUR-AC1, SAUR15, SAUR_AC1	ARABIDOPSIS THALIANA SMALL AUXIN UPREGULATED 15, ARABIDOPSIS COLUMBIA SAUR GENE 1, SMALL AUXIN UPREGULATED 15, SMALL AUXIN UP RNA 1 FROM ARABIDOPSIS THALIANA ECOTYPE COLUMBIA	Mitochondrion	protein_coding	SAUR-like auxin-responsive protein family
LOC9302893	7	5	256877	257496	0.0755357142857143	-0.03026703152892	0.100555555555556	0.0554143416607022	5.92427465303724	2.41021576156258	3.33191838055883	3.3318503776922	XP_002866820.1	AT4G38860.1	AT4G38860.1	0	GO:0005886; GO:0009639; GO:0009733; GO:0009737; GO:0009741	AT4G38860.1	N0.HOG0005685	AT4G38860.1	OG0002011	AT2G21220.1, AT4G38860.1	AT4G38860.1	105	106	100	99	105	100	216	AT4G38860.1	100	105	0	0	1	105	1	105	5.11e-75	216	100	105	106	SAUR16	SMALL AUXIN UPREGULATED RNA 16	Mitochondrion	protein_coding	SAUR-like auxin-responsive protein family
LOC110226893	3	5	263560	264271	0.408653846153846	0.182562997201999	0.408653846153846	0.256539566900565	5.40362565034673	4.47687991086179	3.32893657416045	3.32890623136089	NA	NA	NA	0	NA	NA	NA	NA	NA	NA	NA	NA	NA	NA	NA	NA	NA	NA	NA	NA	NA	NA	NA	NA	NA	NA	NA	NA	NA	NA	NA	NA	NA	NA	NA	NA	NA
LOC9304940	26	5	264356	265955	0.0659466911764706	-0.00370625778513409	0.0905054133612733	0.0410045243626297	5.48930432984437	1.5549176342104	3.32867142263223	3.32843476164375	XP_020875191.1	AT4G38870.1	AT4G38870.1	0	GO:0005515	AT4G38870.1	N0.HOG0007451	AT4G38870.1	OG0002980	AT4G38870.1	AT4G38870.1	425	427	100	99	426	83.099	709	AT4G38870.1	83.099	426	71	1	1	425	1	426	0	709	100	425	427			Mitochondrion	protein_coding	F-box and associated interaction domains-containing protein
LOC9304941	23	5	266214	267865	0.162220662220662	0.00171685727682701	0.213243099787686	0.0855256572671868	26.3584895707255	5.03863863619758	3.32804925605422	3.32773739210683	XP_002866821.1	AT4G38880.1	AT4G38880.1	0	GO:0004044; GO:0006189; GO:0006541; GO:0009113; GO:0009570; GO:0046872; GO:0051536	AT4G38880.1	N0.HOG0026543	AT4G38880.1	OG0020348	AT4G38880.1	AT4G38880.1	533	533	100	99	534	94.007	1010	AT4G38880.1	94.007	534	29	3	1	533	1	532	0	1010	100	533	533	ASE3, ATASE3	GLN phosphoribosyl pyrophosphate amidotransferase 3, GLN phosphoribosyl pyrophosphate amidotransferase 3	Chloroplast	protein_coding	GLN phosphoribosyl pyrophosphate amidotransferase 3
LOC9302895	56	5	267936	271341	0.158185128900207	0.00342325669034632	0.158185128900207	0.0677365495511563	16.6608291526604	3.70797686831275	3.32730307372207	3.32662925628252	XP_002868869.1	AT4G38890.1	AT4G38890.1	0	GO:0005773; GO:0006397; GO:0017150; GO:0046872; GO:0050660; GO:0106414; GO:0008033; GO:0003723	AT4G38890.1	N0.HOG0022603	AT4G38890.1	OG0016613	AT4G38890.1	AT4G38890.1	691	692	100	99	691	95.369	1377	AT4G38890.1	95.369	691	32	0	1	691	1	691	0	1377	100	691	692	AtC3H50	NULL	Nucleus	protein_coding	FMN-linked oxidoreductases superfamily protein
LOC9304942	50	5	271479	274373	0.172978318752377	-0.01310465814369	0.172978318752377	0.0723860333997306	17.269763249654	4.03474653400597	3.32581404954945	3.32516321320148	XP_020872762.1	AT4G38900.1	AT4G38900.1	0	GO:0000976; GO:0003700; GO:0005634; GO:0005737; GO:0005829; GO:0006355; GO:0042803; GO:0043565; GO:0090567	AT4G38900.1	N0.HOG0012502	AT4G38900.1	OG0007007	AT4G38900.1	AT4G38900.1	563	554	100	99	569	92.794	960	AT4G38900.1	93.146	569	17	5	1	563	1	553	0	1006	100	563	554	bZIP29, DKML	basic leucine-zipper 29, DRINK ME-LIKE	Nucleus	protein_coding	Basic-leucine zipper (bZIP) transcription factor family protein. Mutants show defects in growth and development of reproductive structures.
LOC110226886	31	5	276206	277391	0.165142549757934	0.0218208273530368	0.172081965357183	0.0666167333142158	10.0045533671462	2.27687455093334	3.3238778170513	3.32365335756102	XP_020875423.1	AT4G38905.1	AT4G38905.1	0	GO:0016020	AT4G38905.1	N0.HOG0006868	AT4G38905.1, AT2G21237.1	OG0002641	AT2G21237.1, AT4G38905.1	AT4G38905.1	233	237	99	99	236	77.119	327	AT4G38905.1	77.119	236	49	4	1	232	1	235	1.32e-115	329	99	233	237			Mitochondrion	protein_coding	NULL
LOC9304943	41	5	277466	279476	0.164222030486051	-0.0112715483498039	0.221162444113264	0.0701005054192048	21.3922161112679	3.12828992543065	3.32335419497826	3.32288480497312	XP_020875422.1	NA	NA	0	NA	NA	NA	NA	NA	NA	NA	NA	NA	NA	NA	NA	NA	NA	NA	NA	NA	NA	NA	NA	NA	NA	NA	NA	NA	NA	NA	NA	NA	NA	NA	NA	NA
LOC9304945	24	5	294167	296025	0.162058371735791	-0.0471886448911713	0.208333333333333	0.0786519627520807	16.3054084095182	3.80580349085573	3.31635168926466	3.31608946066668	XP_002866823.1	AT2G16510.1, AT4G34720.1, AT4G38920.1	AT4G38920.1	0	GO:0000325; GO:0005773; GO:0005774; GO:0005886; GO:0033179; GO:0046961;GO:0005773;GO:0005774; GO:0046961; GO:1902600; GO:0015078; GO:0033177				OG0000277	AT1G19910.1, AT1G75630.2, AT2G16510.1, AT4G34720.1, AT4G38920.1	AT2G16510.1, AT4G34720.1, AT4G38920.1	164	165	100	99	164	100	316	AT4G38920.1, AT4G34720.1, AT2G16510.1	100	164	0	0	1	164	1	164	1.23e-112	316	100	164	165	ATVHA-C1, AVA-P1, VHA-C1 (AT4G34720), ATVHA-C3, AVA-P3, VHA-C3 (AT4G38920), VHA-c5 (AT2G16510)	NULL (AT2G16510), vacuolar-type H(+)-ATPase C3, vacuolar-type H(+)-ATPase C3 (AT4G38920), VACUOLAR H+-PUMPING ATPASE C1 (AT4G34720)	Chloroplast	protein_coding	ATPase, F0/V0 complex, subunit C protein (AT2G16510.1;AT4G34720.1), vacuolar-type H(+)-ATPase C3 (AT4G38920.1)
LOC9302897	47	5	296147	298387	0.122889842632332	-0.0191125619784355	0.130176590092202	0.0521044656009491	13.8937771755092	2.27985896722443	3.31550195168999	3.31511178936756	XP_020872721.1	NA	NA	0	NA	NA	NA	NA	NA	NA	NA	NA	NA	NA	NA	NA	NA	NA	NA	NA	NA	NA	NA	NA	NA	NA	NA	NA	NA	NA	NA	NA	NA	NA	NA	NA	NA
LOC9302899	100	5	300552	306294	0.136929198509442	-0.0209751722539539	0.195444409047467	0.0630035329383622	16.9633401229979	3.05798335325447	3.31370977789614	3.31239569109793	XP_020875044.1	AT4G38950.1	AT4G38950.1	0	GO:0003729; GO:0003777; GO:0005524; GO:0005874; GO:0007018; GO:0008017; GO:0009506	AT4G38950.1	N0.HOG0020047	AT4G38950.1	OG0014093	AT4G38950.1	AT4G38950.1	836	837	100	99	836	96.77	1677	AT4G38950.1	96.77	836	27	0	1	836	1	836	0	1677	100	836	837			Cytoplasm	protein_coding	ATP binding microtubule motor family protein
LOC9304946	36	5	307254	309579	0.127158555729984	-0.00583270781684501	0.127158555729984	0.0553719224411598	4.65793126841288	1.71847493974249	3.31089917169708	3.3103008873149	XP_020875575.1	NA	NA	0	NA	NA	NA	NA	NA	NA	NA	NA	NA	NA	NA	NA	NA	NA	NA	NA	NA	NA	NA	NA	NA	NA	NA	NA	NA	NA	NA	NA	NA	NA	NA	NA	NA
LOC9302900	36	5	310572	312978	0.113842092029168	-0.00290915347207833	0.113842092029168	0.0406685866832807	5.25132216557067	1.10019039320578	3.30947653979689	3.3090676543344	XP_020875228.1	AT4G38970.1	AT4G38970.1	0	GO:0003729; GO:0004332; GO:0005886; GO:0006094; GO:0006096; GO:0009507; GO:0009570; GO:0009579; GO:0009737; GO:0009941; GO:0010287; GO:0048046;GO:0004332	AT4G38970.1	N0.HOG0004634	AT4G38970.1	OG0001465	AT2G21330.1, AT4G38970.1	AT4G38970.1	398	399	100	99	398	98.995	810	AT4G38970.1	98.995	398	4	0	1	398	1	398	0	810	100	398	399	AtFBA2, FBA2	fructose-bisphosphate aldolase 2	Chloroplast	protein_coding	fructose-bisphosphate aldolase 2
LOC9304947	51	5	313936	315341	0.223423423423423	-0.00162657494883843	0.223423423423423	0.0639180328236904	16.0827199017271	3.10305951106177	3.30811695967742	3.30786654561256	XP_020875229.1	AT4G38980.1	AT4G38980.1	0		AT4G38980.1	N0.HOG0020048	AT4G38980.1	OG0014094	AT4G38980.1	AT4G38980.1	277	281	100	99	282	82.979	429	AT4G38980.1	83.688	282	39	4	1	277	1	280	1.59e-159	444	100	277	281			Nucleus	protein_coding	NULL
LOC9304948	12	5	315761	317240	0.10998424076051	-0.0154325609562435	0.117450932085078	0.0711291193809707	11.2732013073678	3.51483262412693	3.30728684749145	3.30713057511439	XP_020872327.1	AT4G38990.2, AT4G39000.1	AT4G38990.2	0	GO:0005576; GO:0008810; GO:0030245; GO:0071555; GO:0005975; GO:0004553				OG0002948	AT4G38990.2, AT4G39000.1		NA	NA	NA	NA	NA	NA	NA	AT4G38990.2	90.379	343	28	2	1	338	152	494	0	602	100	338	495	AtGH9B16, GH9B16 (AT4G38990), AtGH9B17, GH9B17 (AT4G39000)	glycosyl hydrolase 9B16, glycosyl hydrolase 9B16 (AT4G38990), glycosyl hydrolase 9B17, glycosyl hydrolase 9B17 (AT4G39000)	Extracellular	protein_coding	glycosyl hydrolase 9B17 (AT4G39000.1), NULL (AT4G38990.2)
LOC110226906	14	5	317560	318859	0.231818181818182	0.0121035350580634	0.231818181818182	0.0842368487455026	5.75959732954692	1.44310015286382	3.3065778281294	3.30625150384704	NA	NA	NA	0	NA	NA	NA	NA	NA	NA	NA	NA	NA	NA	NA	NA	NA	NA	NA	NA	NA	NA	NA	NA	NA	NA	NA	NA	NA	NA	NA	NA	NA	NA	NA	NA	NA
LOC110226907	6	5	319042	320602	0.198850574712644	-0.082002567876997	0.268888888888889	0.204093030941091	7.94060526243068	5.65415571618052	3.30548757515276	3.30545020340193	NA	NA	NA	0	NA	NA	NA	NA	NA	NA	NA	NA	NA	NA	NA	NA	NA	NA	NA	NA	NA	NA	NA	NA	NA	NA	NA	NA	NA	NA	NA	NA	NA	NA	NA	NA	NA
LOC110226904	1	5	325104	325644	-0.13780487804878	-0.13780487804878	0.13780487804878	0.13780487804878	10.8692415021354	10.8692415021354	3.30326030231577	3.30326030231577	XP_020875491.1	AT4G38990.2	AT4G38990.2	0	GO:0005576; GO:0008810; GO:0030245; GO:0071555; GO:0005975; GO:0004553							NA	NA	NA	NA	NA	NA	NA	AT4G38990.2	92.701	137	9	1	1	137	1	136	1.02e-87	263	99	138	495	AtGH9B16, GH9B16	glycosyl hydrolase 9B16, glycosyl hydrolase 9B16	Extracellular	protein_coding	NULL
LOC9304949	24	5	325896	328437	0.159480965258997	-0.0393057080622132	0.196766627575808	0.110931641104809	23.8406679274777	7.51489760760007	3.30310998018953	3.30259364804368	XP_002868877.1	AT4G39000.1	AT4G39000.1	0	GO:0005576; GO:0008810; GO:0030245; GO:0071555; GO:0005975; GO:0004553	AT4G39000.1	N0.HOG0007397	AT4G39000.1	OG0002948	AT4G38990.2, AT4G39000.1	AT4G39000.1	491	494	100	99	493	90.872	903	AT4G39000.1	90.872	493	43	1	1	491	1	493	0	903	100	491	494	AtGH9B17, GH9B17	glycosyl hydrolase 9B17, glycosyl hydrolase 9B17	Extracellular	protein_coding	glycosyl hydrolase 9B17
LOC9304950	56	5	330795	334822	0.215438596491228	-0.00891420294369249	0.215438596491228	0.0713438545771814	19.7122352609605	4.13327685204021	3.30108313685418	3.30021313263571	XP_002868878.1	AT4G39010.1	AT4G39010.1	0	GO:0005576; GO:0008810; GO:0009828; GO:0010047; GO:0030245; GO:1990059;GO:0008810; GO:0071555; GO:0004553; GO:0005975	AT4G39010.1	N0.HOG0022604	AT4G39010.1	OG0016614	AT4G39010.1	AT4G39010.1	497	498	100	99	497	96.177	998	AT4G39010.1	96.177	497	19	0	1	497	1	497	0	998	100	497	498	AtGH9B18, CEL6, GH9B18	glycosyl hydrolase 9B18, CELLULASE 6, glycosyl hydrolase 9B18	Extracellular	protein_coding	glycosyl hydrolase 9B18
LOC110226909	57	5	334994	340622	0.174486301369863	-0.00964553946180525	0.174486301369863	0.0631932836526635	17.3236933756955	2.82568874479746	3.29932269773143	3.29815575263298	NA	NA	NA	0	NA	NA	NA	NA	NA	NA	NA	NA	NA	NA	NA	NA	NA	NA	NA	NA	NA	NA	NA	NA	NA	NA	NA	NA	NA	NA	NA	NA	NA	NA	NA	NA	NA
LOC110226908	45	5	340851	342607	0.208824982163438	-0.00198129614654944	0.220254565578307	0.110753006066137	22.9364960860034	8.24054130264978	3.29687912805725	3.29657286992291	XP_020875494.1	NA	NA	0	NA	NA	NA	NA	NA	NA	NA	NA	NA	NA	NA	NA	NA	NA	NA	NA	NA	NA	NA	NA	NA	NA	NA	NA	NA	NA	NA	NA	NA	NA	NA	NA	NA
LOC9304951	51	5	346058	347993	0.175947231170425	-0.028080494826197	0.230739893211289	0.0734037543492283	10.9688911932987	2.41259421113743	3.2946961167352	3.29425562214297	XP_002868879.1	AT4G36220.1	AT4G36220.1	0	GO:0004497; GO:0005506; GO:0005783; GO:0005886; GO:0009699; GO:0009809; GO:0010224; GO:0016705; GO:0020037							NA	NA	NA	NA	NA	NA	NA	AT4G36220.1	63.08	474	172	2	38	508	47	520	0	643	93	509	521	CYP84A1, F5H, FAH1	CYTOCHROME P450 84A1, ferulic acid 5-hydroxylase 1	Unknown	protein_coding	ferulic acid 5-hydroxylase 1
LOC9304952	44	5	358070	360680	0.127659574468085	-0.0159537501572032	0.135044642857143	0.043809764507734	9.61169103335959	1.33825886868025	3.28968537919416	3.2891378991776	XP_002866827.1	AT4G34660.1	AT4G34660.1	0	GO:0000421; GO:0005546; GO:0005547; GO:0005634; GO:0005768; GO:0005770; GO:0005829; GO:0005886; GO:0009504; GO:0009920; GO:0030136; GO:0032266; GO:0043130; GO:0043325; GO:0072583; GO:1903527; GO:0005515							NA	NA	NA	NA	NA	NA	NA	AT4G34660.1	73.458	373	94	3	1	373	1	368	0	566	100	373	369	SH3P2	SH3 domain-containing protein 2	Unknown	protein_coding	SH3 domain-containing protein
LOC9302901	30	5	360977	364246	0.0500221827861579	-0.087893899881423	0.550420168067227	0.094242286133179	9.84441052273307	1.77186918546744	3.28823059506141	3.28789200839079	XP_020875112.1	AT1G29870.1	AT1G29870.1	0	GO:0004820; GO:0005524; GO:0005737; GO:0006426; GO:0015966; GO:0046983; GO:0005739; GO:0070150; GO:0000166; GO:0004812; GO:0006418	AT1G29870.1	N0.HOG0004698	AT1G29880.1, AT1G29870.1	OG0001500	AT1G29870.1, AT1G29880.1		NA	NA	NA	NA	NA	NA	NA	AT1G29880.1	73.625	618	145	5	1	603	40	654	0	880	97	620	730			Cytoplasm	protein_coding	tRNA synthetase class II (G, H, P and S) family protein
LOC9304953	84	5	366311	369800	0.148961833376411	-0.0200620404638524	0.178902352102637	0.0477494767321612	10.2956424445424	1.61443436810237	3.28625010104832	3.28563185159449	XP_020875535.1	AT4G39030.1	AT4G39030.1	0	GO:0006952; GO:0009536; GO:0009624; GO:0009697; GO:0009751; GO:0009941; GO:0015297; GO:0031348; GO:0031969; GO:0042742; GO:0042910; GO:0045087; GO:0016020; GO:0055085	AT4G39030.1	N0.HOG0020049	AT4G39030.1	OG0014095	AT4G39030.1	AT4G39030.1	541	544	100	99	543	94.659	992	AT4G39030.1	94.659	543	27	1	1	541	1	543	0	992	100	541	544	EDS5, SCORD3, SID1	ENHANCED DISEASE SUSCEPTIBILITY 5, susceptible to coronatine-deficient Pst DC3000 3, SALICYLIC ACID INDUCTION DEFICIENT 1	Chloroplast	protein_coding	MATE efflux family protein
LOC9302902	36	5	369872	371380	0.193240013656538	-0.00426515378408558	0.193240013656538	0.0614291166989262	15.1689295000569	2.64741790897927	3.28475606613816	3.28447754104424	XP_002868881.1	AT4G39040.1	AT4G39040.1	0	GO:0003723;GO:0003729; GO:0005886; GO:0009507; GO:0003723	AT4G39040.1	N0.HOG0017847	AT4G39040.1	OG0011984	AT4G39040.1	AT4G39040.1	287	297	100	99	297	81.481	367	AT4G39040.1	84.564	298	33	5	1	287	1	296	5.66e-133	378	100	287	297	CFM4	CRM family member subfamily 4	Unknown	protein_coding	RNA-binding CRS1 / YhbY (CRM) domain protein
LOC9304954	137	5	379150	386670	0.071008194123772	-0.0450544902152497	0.217285508291276	0.0577615394982361	14.4064354504676	2.71474601265277	3.28083558157376	3.2792562791558	XP_002866829.1	AT4G39050.1	AT4G39050.1	0	GO:0003777; GO:0005524; GO:0005739; GO:0005874; GO:0007018; GO:0008017; GO:0031347; GO:0046872	AT4G39050.1	N0.HOG0017848	AT4G39050.1	OG0011985	AT4G39050.1	AT4G39050.1	1055	1056	100	99	1055	98.578	2131	AT4G39050.1	98.578	1055	15	0	1	1055	1	1055	0	2131	100	1055	1056	Kin7.4	kinesin 7.4	Nucleus	protein_coding	Kinesin motor family protein
LOC9302903	22	5	388145	389924	0.191570881226054	0.039689481573661	0.191570881226054	0.0752456556315245	22.1642233867326	3.67691744675427	3.27576189216277	3.27475846285343	XP_020872126.1	AT4G39070.1	AT4G39070.1	0	GO:0000976; GO:0003700; GO:0005634; GO:0006355; GO:0008270; GO:0009741; GO:1900458; GO:2000306; GO:0009640	AT4G39070.1	N0.HOG0017849	AT4G39070.1	OG0011986	AT4G39070.1	AT4G39070.1	238	243	100	99	242	95.455	477	AT4G39070.1	95.455	242	7	1	1	238	1	242	1.02e-173	477	100	238	243	BBX20, BZS1, STH7	B-box domain protein 20, BZS1, SALT TOLERANCE HOMOLOG 7	Nucleus	protein_coding	B-box zinc finger family protein
LOC110226031	2	5	395762	403051	0.181818181818182	0.133333333333333	0.181818181818182	0.133333333333333	1.21280032523219	0.770413042333487	3.26299295854003	3.26297461237103	XP_020872178.1			0								NA	NA	NA	NA	NA	NA	NA		NA	NA	NA	NA	NA	NA	NA	NA	NA	NA	NA	NA	NA
LOC9304955	25	5	406376	412033	0.133354350567465	-0.0123075677917361	0.154687794755706	0.0637317242623785	15.7905644023794	3.62739686808868	3.25570230216905	3.25361928925988	XP_002866830.1	AT4G39080.1	AT4G39080.1	0	GO:0000220; GO:0000325; GO:0005773; GO:0005774; GO:0005794; GO:0005886; GO:0009507; GO:0009678; GO:0009705; GO:0009941; GO:0015986; GO:0032119; GO:0043181; GO:0046961; GO:0070072; GO:0033179; GO:1902600; GO:0007035; GO:0016471; GO:0051117	AT4G39080.1	N0.HOG0005997	AT2G21410.1, AT4G39080.1	OG0002168	AT2G21410.1, AT4G39080.1	AT4G39080.1	820	822	100	99	821	97.199	1652	AT4G39080.1	97.199	821	22	1	1	820	1	821	0	1652	100	820	822	VHA-A3	vacuolar proton ATPase A3	Cytoplasm	protein_coding	vacuolar proton ATPase A3
LOC9302904	24	5	412382	414316	0.142157953281424	-0.0388520628156965	0.325396825396825	0.0748687807173728	14.112149353795	2.28087577292544	3.24891866719584	3.2479244067593	XP_020872666.1	AT4G39090.1	AT4G39090.1	0	GO:0000323; GO:0004197; GO:0005634; GO:0005773; GO:0005886; GO:0006508; GO:0006970; GO:0009651; GO:0042742; GO:0008234	AT4G39090.1	N0.HOG0007116	AT4G39090.1	OG0002791	AT2G21430.1, AT4G39090.1	AT4G39090.1	368	369	100	99	368	96.739	741	AT4G39090.1	96.739	368	12	0	1	368	1	368	0	741	100	368	369	RD19, RD19A	RESPONSIVE TO DEHYDRATION 19, RESPONSIVE TO DEHYDRATION 19A	Extracellular	protein_coding	Papain family cysteine protease
LOC9304957	13	5	417176	422175	0.101628298708591	-0.0010372312875512	0.101628298708591	0.0388811739552861	4.68671021071405	1.27478228579207	3.24361384463278	3.24292353260488	XP_002868885.2	AT4G39110.1	AT4G39110.1	0	GO:0004674; GO:0004714; GO:0005524; GO:0006468; GO:0009507; GO:0009555; GO:0016324; GO:0080092; GO:0004672	AT4G39110.1	N0.HOG0005998	AT4G39110.1	OG0002169	AT2G21480.1, AT4G39110.1	AT4G39110.1	948	879	93	99	882	97.846	1783	AT4G39110.1	97.846	882	15	1	67	948	1	878	0	1783	93	948	879	BUPS1, PIR1	Buddhas Paper Seal 1, PIRITHIOUS1	Unknown	protein_coding	Malectin/receptor-like protein kinase family protein
LOC9304959	38	5	417194	424804	0.148809523809524	0.00744319448847845	0.148809523809524	0.0434001870178983	6.63187345478503	1.3150854703934	3.24361384463278	3.23826899406464	XP_002868887.1	AT4G39120.2	AT4G39120.2	0	GO:0000105; GO:0004401; GO:0006021; GO:0008934; GO:0009507; GO:0010347; GO:0042578; GO:0046872; GO:0052832; GO:0052833; GO:0052834	AT4G39120.2	N0.HOG0020051	AT4G39120.2	OG0014097	AT4G39120.2	AT4G39120.2	346	376	100	92	346	92.775	641	AT4G39120.2	92.775	346	25	0	1	346	30	375	0	641	100	346	376	HISN7, IMPL2	HISTIDINE BIOSYNTHESIS 7, myo-inositol monophosphatase like 2	Cytoplasm	protein_coding	NULL
LOC9304960	29	5	424881	425866	0.141047297297297	0.00451930929640457	0.202868852459016	0.079310542047923	10.8060663924319	3.09718124239497	3.23512234810919	3.23472214474033	XP_002868888.1	AT4G39130.1	AT4G39130.1	0	GO:0005829; GO:0009415; GO:0009414; GO:0009631; GO:0009737	AT4G39130.1	N0.HOG0024211	AT4G39130.1	OG0018176	AT4G39130.1	AT4G39130.1	161	152	99	98	159	79.874	239	AT4G39130.1	81.761	159	19	3	1	159	1	149	3.79e-87	251	99	161	152			Unknown	protein_coding	Dehydrin family protein
LOC9304961	36	5	426123	429093	0.10077841203944	-0.0346399001414327	0.15906607054148	0.0602472529050965	10.0961442109405	2.44768014586386	3.23375250082399	3.2315784489119	XP_020874672.1	NA	NA	0	NA	NA	NA	NA	NA	NA	NA	NA	NA	NA	NA	NA	NA	NA	NA	NA	NA	NA	NA	NA	NA	NA	NA	NA	NA	NA	NA	NA	NA	NA	NA	NA	NA
LOC9304962	12	5	429596	431631	0.137834394904459	0.0115717202886266	0.137834394904459	0.0477665857166592	5.87325487915152	1.28580182677858	3.22982864443644	3.22919662818019	XP_020874414.1	AT4G39150.1	AT4G39150.1	0	GO:0005886	AT4G39150.1	N0.HOG0004841	AT4G39150.1	OG0001569	AT2G21510.2, AT4G39150.1	AT4G39150.1	324	346	98	91	317	92.429	602	AT4G39150.1	92.429	317	23	1	8	324	30	345	0	602	98	324	346			Cytoplasm	protein_coding	DNAJ heat shock N-terminal domain-containing protein
LOC9304963	50	5	431633	435943	0.198366902558519	0.00193885072120453	0.24920424403183	0.072914999129527	17.5423076427978	3.39070181494425	3.22681542516462	3.22484729263005	XP_002866831.1	AT4G39160.2	AT4G39160.2	0	GO:0003677; GO:0000126; GO:0001156; GO:0070898	AT4G39160.2	N0.HOG0008142	AT4G39160.2	OG0003415	AT4G39160.2	AT4G39160.2	600	625	100	96	602	87.708	1005	AT4G39160.2	87.708	602	71	3	1	600	1	601	0	1006	100	600	625			Nucleus	protein_coding	Homeodomain-like superfamily protein
LOC9302905	13	5	436836	440086	0.153510872688955	-0.00444848834262203	0.153510872688955	0.0520339043038467	8.67067038003478	1.60210020271186	3.22177634407978	3.22127881650373	XP_002866832.1	AT4G39170.1	AT4G39170.1	0	GO:0000139; GO:0005886; GO:0015031	AT4G39170.1	N0.HOG0023995	AT4G39170.1	OG0017971	AT4G39170.1	AT4G39170.1	614	615	100	99	614	97.231	1237	AT4G39170.1	97.231	614	17	0	1	614	1	614	0	1237	100	614	615			Golgi_body	protein_coding	Sec14p-like phosphatidylinositol transfer family protein
[truncated: 54 more columns]

## Sheet: S3
Supplementary Data S3: GO enrichment analysis with significantly enriched biological processes (BP) and molecular functions (MF) GO terms
GO.ID	Term	Annotated	Significant	Expected	classicFisher	elimFisher	FE
GO:0000055	ribosomal large subunit export from nucl...	8	3	0.11938	0.00017	0.00017	25.1298374937175
GO:0032119	sequestering of zinc ion	2	2	0.02984	0.00022	0.00022	67.0241286863271
GO:0007035	vacuolar acidification	10	3	0.14922	0.00037	0.00037	20.1045436268597
GO:0009699	phenylpropanoid biosynthetic process	148	9	2085-02-01	0.00039	0.00039	4.07516413855558
GO:0030245	cellulose catabolic process	27	4	0.4029	0.00065	0.00065	9.92802184164805
GO:0010968	regulation of microtubule nucleation	3	2	0.04477	0.00066	0.00066	44.6727719454992
GO:0051555	flavonol biosynthetic process	28	4	0.41782	0.00075	0.00075	9.57350055047628
GO:0006621	protein retention in ER lumen	14	3	0.20891	0.00106	0.00106	14.3602508257144
GO:0043181	vacuolar sequestering	4	2	0.05969	0.00131	0.00131	33.5064499916234
GO:0048455	stamen formation	4	2	0.05969	0.00131	0.00131	33.5064499916234
GO:0006888	endoplasmic reticulum to Golgi vesicle-m...	113	7	1.68622	0.00155	0.00155	4.15129698378622
GO:0048229	gametophyte development	558	18	8.32664	0.00196	0.00196	2.16173630660146
GO:0009828	plant-type cell wall loosening	38	4	0.56705	0.00241	0.00241	7.05405167092849
GO:0046034	ATP metabolic process	96	6	1.43254	0.00318	0.00318	4.18836472280006
GO:0000381	regulation of alternative mRNA splicing,...	41	4	0.61181	0.0032	0.0032	6.53797747666759
GO:0051754	meiotic sister chromatid cohesion, centr...	7	2	0.10446	0.00444	0.00444	19.146084625694
GO:0006890	retrograde vesicle-mediated transport, G...	47	4	0.70135	0.00525	0.00525	5.70328651885649
GO:0010099	regulation of photomorphogenesis	47	4	0.70135	0.00525	0.00525	5.70328651885649
GO:0009269	response to desiccation	24	3	0.35814	0.00529	0.00529	8.37661249790585
GO:0048655	anther wall tapetum morphogenesis	8	2	0.11938	0.00586	0.00586	16.7532249958117
GO:0070072	vacuolar proton-transporting V-type ATPa...	8	2	0.11938	0.00586	0.00586	16.7532249958117
GO:1900458	negative regulation of brassinosteroid m...	8	2	0.11938	0.00586	0.00586	16.7532249958117
GO:0009308	amine metabolic process	146	7	2.17866	0.00644	0.00644	3.21298412785841
GO:0006094	gluconeogenesis	27	3	0.4029	0.00739	0.00739	7.44601638123604
GO:0000244	spliceosomal tri-snRNP complex assembly	9	2	0.1343	0.00746	0.00746	14.8920327624721
GO:0015918	sterol transport	9	2	0.1343	0.00746	0.00746	14.8920327624721
GO:0009833	plant-type primary cell wall biogenesis	28	3	0.41782	0.00819	0.00819	7.18012541285721
GO:0005977	glycogen metabolic process	29	3	0.43275	0.00903	0.00903	6.93240901213172
GO:0061739	protein lipidation involved in autophago...	10	2	0.14922	0.00923	0.00923	13.4030290845731
GO:0016052	carbohydrate catabolic process	354	15	5.28249	0.00031	0.0098	2.83956997552291
GO:0015031	protein transport	931	27	13.89266	0.00083	0.00998	1.94347230839882
GO:0030388	fructose 1,6-bisphosphate metabolic proc...	12	2	0.17907	0.01328	0.01328	11.1688166638745
GO:0009808	lignin metabolic process	94	5	4027-01-01	0.0134	0.0134	3.56455407428531
GO:0009809	lignin biosynthetic process	65	4	0.96995	0.01617	0.01617	4.12392391360379
GO:0006491	N-glycan processing	14	2	0.20891	0.01795	0.01795	9.57350055047628
GO:0044106	cellular amine metabolic process	102	5	1.52207	0.01848	0.01848	3.28500003285
GO:0007018	microtubule-based movement	69	4	1.02964	0.01972	0.01972	3.88485295831553
GO:0060560	developmental growth involved in morphog...	456	13	6.80457	0.02024	0.02024	1.91048075043684
GO:0048588	developmental cell growth	270	9	4.02902	0.02067	0.02067	2.23379382579387
GO:0009631	cold acclimation	70	4	1.04456	0.02068	0.02068	3.82936355977637
GO:0009555	pollen development	411	12	6.13306	0.02134	0.02134	1.95660893583301
GO:0009900	dehiscence	40	3	0.59689	0.02166	0.02166	5.0260517013185
GO:0009396	folic acid-containing compound biosynthe...	16	2	0.23876	0.02321	0.02321	8.37661249790585
GO:0009553	embryo sac development	189	7	2.82031	0.02375	0.02375	2.48199665994164
GO:0010100	negative regulation of photomorphogenesi...	17	2	0.25368	0.02605	0.02605	7.88394828129927
GO:0000413	protein peptidyl-prolyl isomerization	44	3	0.65658	0.02781	0.02781	4.56913095129306
GO:0042559	pteridine-containing compound biosynthet...	18	2	0.2686	0.02902	0.02902	7.44601638123604
GO:0080092	regulation of pollen tube growth	45	3	0.6715	0.02947	0.02947	4.46760982874162
GO:0080147	root hair cell development	116	5	1.73099	0.03015	0.03015	2.88852044205917
GO:0010310	regulation of hydrogen peroxide metaboli...	19	2	0.28352	0.03212	0.03212	7.05417607223476
GO:0033044	regulation of chromosome organization	47	3	0.70135	0.03296	0.03296	4.27746488914237
GO:0034504	protein localization to nucleus	81	4	1.20871	0.03309	0.03309	3.30931323477095
GO:0000272	polysaccharide catabolic process	233	11	4769-03-01	0.0008	0.03394	3.16373781241911
GO:0045229	external encapsulating structure organiz...	746	21	11.13203	0.00433	0.03519	1.88644838362814
GO:0044804	autophagy of nucleus	20	2	0.29845	0.03535	0.03535	6.70128999832468
GO:0007051	spindle organization	83	4	1.23855	0.03572	0.03572	3.22958298009769
GO:0006886	intracellular protein transport	569	18	8.49079	0.00242	0.03778	2.11994408058614
GO:0010224	response to UV-B	85	4	2684-01-01	0.03847	0.03847	3.15357931251971
GO:0048767	root hair elongation	85	4	2684-01-01	0.03847	0.03847	3.15357931251971
GO:0010769	regulation of cell morphogenesis involve...	50	3	0.74611	0.03857	0.03857	4.02085483373765
GO:0009826	unidimensional cell growth	402	11	5.99876	0.03998	0.03998	1.83371230054211
GO:2000012	regulation of auxin polar transport	51	3	0.76104	0.04055	0.04055	3.94197414064964
GO:0010600	regulation of auxin biosynthetic process	22	2	0.32829	0.04215	0.04215	6.09217460172408
GO:0007623	circadian rhythm	170	6	2.53679	0.04265	0.04265	2.36519380792261
GO:0009309	amine biosynthetic process	53	3	0.79088	0.04464	0.04464	3.79324296985636
GO:0042401	cellular biogenic amine biosynthetic pro...	53	3	0.79088	0.04464	0.04464	3.79324296985636
GO:0015693	magnesium ion transport	23	2	0.34321	0.04571	0.04571	5.82733603333236
GO:0006576	cellular biogenic amine metabolic proces...	90	4	1.34301	0.04587	0.04587	2.97838437539557
GO:0016192	vesicle-mediated transport	615	20	9.17721	0.00102	0.04778	2.17931157726586
GO:0006405	RNA export from nucleus	55	3	0.82073	0.04893	0.04893	3.65528249241529
GO:0048468	cell development	417	11	2226-06-01	0.04963	0.04963	1.76774981518979
GO:0033365	protein localization to organelle	384	13	5.73016	0.00539	0.04997	2.26869755818337
GO:0047641	aldose-6-phosphate reductase (NADPH) act...	2	2	0.02967	0.00022	0.00022	67.4081563869228
GO:0047807	cytokinin 7-beta-glucosyltransferase act...	2	2	0.02967	0.00022	0.00022	67.4081563869228
GO:0050139	nicotinate-N-glucosyltransferase activit...	2	2	0.02967	0.00022	0.00022	67.4081563869228
GO:0080062	cytokinin 9-beta-glucosyltransferase act...	2	2	0.02967	0.00022	0.00022	67.4081563869228
GO:0035798	2-alkenal reductase (NADP+) activity	3	2	0.0445	0.00065	0.00065	44.9438202247191
GO:0008810	cellulase activity	28	4	0.41533	0.00074	0.00074	9.63089591409241
GO:0046961	proton-transporting ATPase activity, rot...	35	4	0.51916	0.00174	0.00174	7.70475383311503
GO:0140030	modification-dependent protein binding	69	5	1.02348	0.00362	0.00362	4.88529331301051
GO:0017056	structural constituent of nuclear pore	23	3	0.34116	0.0046	0.0046	8.79352796341892
GO:0032440	2-alkenal reductase [NAD(P)+] activity	11	4	0.16316	1.5e-05	0.00574	24.515812699191
GO:0003755	peptidyl-prolyl cis-trans isomerase acti...	77	5	1.14215	0.00578	0.00578	4.37770870726262
GO:0004332	fructose-bisphosphate aldolase activity	8	2	0.11866	0.00579	0.00579	16.8548794876117
GO:0005471	ATP:ADP antiporter activity	8	2	0.11866	0.00579	0.00579	16.8548794876117
GO:0016760	cellulose synthase (UDP-forming) activit...	27	3	0.40049	0.00728	0.00728	7.49082374091738
GO:0046923	ER retention sequence binding	9	2	0.1335	0.00738	0.00738	14.9812734082397
GO:0005049	nuclear export signal receptor activity	10	2	0.14833	0.00913	0.00913	13.4834490662712
GO:0051011	microtubule minus-end binding	10	2	0.14833	0.00913	0.00913	13.4834490662712
GO:0004032	alditol:NADP+ 1-oxidoreductase activity	11	2	0.16316	0.01105	0.01105	12.2579063495955
GO:0032266	phosphatidylinositol-3-phosphate binding	14	2	0.20766	0.01775	0.01775	9.63112780506597
GO:0003777	microtubule motor activity	69	4	1.02348	0.01937	0.01937	3.90823465040841
GO:0043021	ribonucleoprotein complex binding	104	5	1.54264	0.01952	0.01952	3.24119690919463
GO:0008106	alcohol dehydrogenase (NADP+) activity	15	2	0.2225	0.02029	0.02029	8.98876404494382
GO:0008641	ubiquitin-like modifier activating enzym...	16	2	0.23733	0.02296	0.02296	8.42708465006531
GO:0031593	polyubiquitin modification-dependent pro...	42	3	0.62299	0.02427	0.02427	4.81548660492143
GO:0016861	intramolecular oxidoreductase activity, ...	18	2	0.267	0.02871	0.02871	7.49063670411985
GO:0043022	ribosome binding	46	3	0.68232	0.03074	0.03074	4.39676398170946
GO:0015095	magnesium ion transmembrane transporter ...	20	2	0.29666	0.03497	0.03497	6.74172453313558
GO:0032934	sterol binding	21	2	0.31149	0.03828	0.03828	6.42075187004398
GO:0051117	ATPase binding	21	2	0.31149	0.03828	0.03828	6.42075187004398
GO:0003774	cytoskeletal motor activity	87	4	1.29048	0.04064	0.04064	3.09962184613477
GO:0015154	disaccharide transmembrane transporter a...	22	2	0.32633	0.0417	0.0417	6.12876536021818
GO:0015157	oligosaccharide transmembrane transporte...	22	2	0.32633	0.0417	0.0417	6.12876536021818
GO:0016018	cyclosporin A binding	23	2	0.34116	0.04524	0.04524	5.86235197561262
GO:0052745	inositol phosphate phosphatase activity	23	2	0.34116	0.04524	0.04524	5.86235197561262
GO:0004033	aldo-keto reductase (NADP) activity	24	2	0.35599	0.04888	0.04888	5.61813534088036
GO:0004869	cysteine-type endopeptidase inhibitor ac...	24	2	0.35599	0.04888	0.04888	5.61813534088036

## Sheet: S4
Supplementary data S4: Expression of BSA-QTL candidate genes in root tip, root, and leaf tissues
Gene_ID	tissue	tpm_mean	tpm_max	expression_level
AT1G02490	root tip	2026-04-01	2	Medium
AT1G07780	root tip	2	3	Medium
AT1G19740	root tip	2026-05-15	16	Medium
AT1G21990	root tip	0.1	0.2	Low
AT1G22015	root tip	0	0	Low
AT1G29870	root tip	0	0	Low
AT1G45688	root tip	131.5	151	High
AT1G50200	root tip	179	186	High
AT1G52950	root tip	0.5	0.9	Medium
AT1G53780	root tip	36.5	41	High
AT1G53790	root tip	6	7	Medium
AT1G55928	root tip	0	0	Low
AT2G13770	root tip	0	0	Low
AT2G16220	root tip	0	0	Low
AT2G16510	root tip	91.5	103	High
AT2G16520	root tip	0	0	Low
AT2G20920	root tip	2026-05-18	21	Medium
AT2G20921	root tip	0	0	Low
AT2G20930	root tip	44.5	51	High
AT2G20940	root tip	2026-05-19	26	Medium
AT2G20950	root tip	2026-05-14	17	Medium
AT2G20960	root tip	54	65	High
AT2G20970	root tip	0	0	Low
AT2G20980	root tip	2026-05-13	18	Medium
AT2G21010	root tip	0	0	Low
AT2G21045	root tip	597	745	High
AT2G21050	root tip	2026-05-27	44	High
AT2G21060	root tip	48.5	66	High
AT2G21070	root tip	8	11	Medium
AT2G21080	root tip	2	3	Medium
AT2G21090	root tip	2026-05-08	11	Medium
AT2G21100	root tip	49.5	54	High
AT2G21110	root tip	0	0	Low
AT2G21120	root tip	32	34	High
AT2G21130	root tip	2026-05-09	16	Medium
AT2G21150	root tip	39.5	44	High
AT2G21160	root tip	352.5	398	High
AT2G21170	root tip	206.5	215	High
AT2G21180	root tip	11	14	Medium
AT2G21190	root tip	47	49	High
AT2G21195	root tip	2026-05-09	12	Medium
AT2G21200	root tip	0	0	Low
AT2G21210	root tip	2026-04-02	4	Medium
AT2G21220	root tip	0	0	Low
AT2G21237	root tip	0.1	0.2	Low
AT2G21240	root tip	41.5	44	High
AT2G21250	root tip	93.5	116	High
AT2G21260	root tip	0.45	0.7	Medium
AT2G21270	root tip	88.5	99	High
AT2G21280	root tip	2026-05-03	4	Medium
AT2G21290	root tip	49	58	High
AT2G21300	root tip	34.5	43	High
AT2G21320	root tip	2026-05-01	2	Medium
AT2G21330	root tip	0.4	0.6	Medium
AT2G21340	root tip	2026-05-08	12	Medium
AT2G21350	root tip	3	4	Medium
AT2G21380	root tip	19	22	Medium
AT2G21385	root tip	2026-05-11	14	Medium
AT2G21390	root tip	127.5	149	High
AT2G21400	root tip	0.55	1	Medium
AT2G21410	root tip	67	78	High
AT2G21430	root tip	2	2	Medium
AT2G21455	root tip	0	0	Low
AT2G21465	root tip	0	0	Low
AT2G21470	root tip	38	42	High
AT2G21480	root tip	0	0	Low
AT2G21490	root tip	0	0	Low
AT2G21510	root tip	1.25	2	Medium
AT2G21520	root tip	126.5	145	High
AT2G21530	root tip	0.35	0.4	Medium
AT2G21550	root tip	2026-05-18	24	Medium
AT2G21560	root tip	35.5	37	High
AT2G21580	root tip	285	395	High
AT2G21600	root tip	91	94	High
AT2G21610	root tip	1.95	3	Medium
AT2G21620	root tip	382.5	443	High
AT2G21630	root tip	2026-05-06	9	Medium
AT2G21640	root tip	2026-05-05	7	Medium
AT2G45250	root tip	2026-05-26	31	High
AT3G03341	root tip	0.1	0.2	Low
AT3G05365	root tip	0.15	0.2	Medium
AT3G09160	root tip	0	0	Low
AT3G51690	root tip	0	0	Low
AT3G60245	root tip	1225	1761	High
AT4G03430	root tip	36.5	40	High
AT4G34070	root tip	2026-05-22	24	Medium
AT4G34660	root tip	44.5	48	High
AT4G36220	root tip	30	39	High
AT4G38140	root tip	0.8	1	Medium
AT4G38150	root tip	2026-05-06	9	Medium
AT4G38160	root tip	5	7	Medium
AT4G38170	root tip	10	13	Medium
AT4G38180	root tip	2026-05-02	3	Medium
AT4G38190	root tip	0	0	Low
AT4G38200	root tip	2026-05-29	33	High
AT4G38210	root tip	0.05	0.1	Low
AT4G38213	root tip	0	0	Low
AT4G38220	root tip	155.5	186	High
AT4G38225	root tip	2026-05-07	10	Medium
AT4G38230	root tip	29	31	High
AT4G38250	root tip	0	0	Low
AT4G38260	root tip	50	58	High
AT4G38270	root tip	31	36	High
AT4G38340	root tip	1.45	2	Medium
AT4G38350	root tip	49	53	High
AT4G38360	root tip	62	72	High
AT4G38370	root tip	18	25	Medium
AT4G38380	root tip	7	9	Medium
AT4G38390	root tip	2026-05-14	20	Medium
AT4G38400	root tip	2026-05-11	14	Medium
AT4G38405	root tip	0	0	Low
AT4G38410	root tip	2026-07-01	3	Medium
AT4G38420	root tip	2026-05-02	3	Medium
AT4G38430	root tip	36.5	49	High
AT4G38440	root tip	9	11	Medium
AT4G38460	root tip	38	40	High
AT4G38470	root tip	225.5	281	High
AT4G38490	root tip	2026-05-13	17	Medium
AT4G38495	root tip	36	41	High
AT4G38500	root tip	30	32	High
AT4G38510	root tip	250.5	258	High
AT4G38520	root tip	43	46	High
AT4G38540	root tip	41	52	High
AT4G38560	root tip	0.25	0.4	Medium
AT4G38570	root tip	23	24	Medium
AT4G38580	root tip	2026-05-11	17	Medium
AT4G38590	root tip	0.2	0.2	Medium
AT4G38600	root tip	78.5	79	High
AT4G38620	root tip	76	90	High
AT4G38630	root tip	186.5	202	High
AT4G38640	root tip	30	32	High
AT4G38650	root tip	2	3	Medium
AT4G38660	root tip	2026-05-24	34	Medium
AT4G38680	root tip	92.5	133	High
AT4G38690	root tip	9	14	Medium
AT4G38700	root tip	0.05	0.1	Low
AT4G38710	root tip	70.5	94	High
AT4G38730	root tip	11	13	Medium
AT4G38740	root tip	280.5	423	High
AT4G38760	root tip	2026-05-17	21	Medium
AT4G38770	root tip	11	14	Medium
AT4G38780	root tip	2026-05-01	2	Medium
AT4G38790	root tip	54	57	High
AT4G38800	root tip	307.5	337	High
AT4G38810	root tip	30	35	High
AT4G38825	root tip	0	0	Low
AT4G38830	root tip	2026-05-12	17	Medium
AT4G38840	root tip	0.6	0.6	Medium
AT4G38850	root tip	0	0	Low
AT4G38860	root tip	1.25	2	Medium
AT4G38870	root tip	0	0	Low
AT4G38880	root tip	0	0	Low
AT4G38890	root tip	32	42	High
AT4G38900	root tip	21	24	Medium
AT4G38905	root tip	0	0	Low
AT4G38940	root tip	10	10	Medium
AT4G38950	root tip	2026-05-21	30	Medium
AT4G38970	root tip	11	20	Medium
AT4G38980	root tip	2026-05-06	7	Medium
AT4G38990	root tip	0	0	Low
AT4G39000	root tip	2026-02-06	12	Medium
AT4G39010	root tip	2026-06-01	3	Medium
AT4G39030	root tip	38	38	High
AT4G39040	root tip	2026-05-20	22	Medium
AT4G39050	root tip	56.5	65	High
AT4G39070	root tip	29	36	High
AT4G39080	root tip	323	429	High
AT4G39090	root tip	1001.5	1336	High
AT4G39100	root tip	50	61	High
AT4G39110	root tip	0.85	1	Medium
AT4G39120	root tip	28	35	High
AT4G39130	root tip	0	0	Low
AT4G39150	root tip	56.5	62	High
AT4G39160	root tip	2026-05-21	25	Medium
AT4G39170	root tip	40.5	47	High
AT5G04800	root tip	135.5	186	High
AT5G04920	root tip	66	74	High
AT5G04930	root tip	44.5	52	High
AT5G04940	root tip	2026-05-12	16	Medium
AT5G04950	root tip	355.5	461	High
AT5G04960	root tip	106.5	153	High
AT5G04970	root tip	14	22	Medium
AT5G04980	root tip	7	8	Medium
AT5G04990	root tip	53	56	High
AT5G05000	root tip	40	46	High
AT5G05010	root tip	229	259	High
AT5G05030	root tip	0	0	Low
AT5G05040	root tip	0.1	0.2	Low
AT5G05070	root tip	0	0	Low
AT5G05080	root tip	153	154	High
AT5G05090	root tip	0.45	0.6	Medium
AT5G05100	root tip	85.5	92	High
AT5G05110	root tip	63.5	75	High
AT5G05113	root tip	0.45	0.6	Medium
AT5G05120	root tip	0.1	0.2	Low
AT5G05130	root tip	2026-05-04	6	Medium
AT5G05140	root tip	68	78	High
AT5G05150	root tip	0.05	0.1	Low
AT5G05160	root tip	41	52	High
AT5G05170	root tip	321	365	High
AT5G05180	root tip	2026-05-15	18	Medium
AT5G05190	root tip	9	11	Medium
AT5G05200	root tip	32	32	High
AT5G05210	root tip	66	86	High
AT5G05220	root tip	0.2	0.2	Medium
AT5G05230	root tip	27	28	High
AT5G05250	root tip	12	14	Medium
AT5G05260	root tip	0.05	0.1	Low
AT5G05280	root tip	0.45	0.8	Medium
AT5G05290	root tip	0	0	Low
AT5G05300	root tip	0.65	0.8	Medium
AT5G05330	root tip	2026-05-02	4	Medium
AT5G05340	root tip	2026-05-01	2	Medium
AT5G05350	root tip	0.65	0.8	Medium
AT5G05360	root tip	2026-05-24	27	Medium
AT5G05365	root tip	2	2	Medium
AT5G05370	root tip	161	176	High
AT5G05380	root tip	2026-05-09	10	Medium
AT5G05390	root tip	3	3	Medium
AT5G05410	root tip	31	39	High
AT5G05430	root tip	0	0	Low
AT5G05440	root tip	2026-05-25	33	Medium
AT5G05450	root tip	25	28	Medium
AT5G05460	root tip	39.5	40	High
AT5G05470	root tip	40.5	54	High
AT5G05480	root tip	12	13	Medium
AT5G05490	root tip	0.6	0.6	Medium
AT5G05500	root tip	115.5	172	High
AT5G05510	root tip	2026-05-09	11	Medium
AT5G05520	root tip	45.5	49	High
AT5G05530	root tip	1	1	Medium
AT5G05540	root tip	2026-05-21	29	Medium
AT5G05550	root tip	5	7	Medium
AT5G05570	root tip	2026-05-27	30	High
AT5G05580	root tip	2026-05-04	6	Medium
AT5G05600	root tip	78	123	High
AT5G05610	root tip	52.5	64	High
AT5G05620	root tip	17	23	Medium
AT5G05630	root tip	0.8	1	Medium
AT5G05640	root tip	7	10	Medium
AT5G05657	root tip	0	0	Low
AT5G05660	root tip	2026-05-30	36	High
AT5G05670	root tip	32.5	38	High
AT5G05680	root tip	2026-05-15	19	Medium
AT5G05690	root tip	23	25	Medium
AT5G05710	root tip	12	13	Medium
AT5G05730	root tip	36.5	56	High
AT5G05760	root tip	23	24	Medium
AT5G05770	root tip	2	2	Medium
AT5G05780	root tip	175.5	191	High
AT5G05790	root tip	32	33	High
AT5G05810	root tip	2026-05-02	3	Medium
AT5G05820	root tip	2026-05-29	30	High
AT5G05830	root tip	2026-05-09	13	Medium
AT5G05840	root tip	5	7	Medium
AT5G05850	root tip	2026-05-12	14	Medium
AT5G05860	root tip	31	32	High
AT5G05870	root tip	7	7	Medium
AT5G05880	root tip	17	23	Medium
AT5G05890	root tip	33.5	43	High
AT5G05900	root tip	8	11	Medium
AT5G05910	root tip	0	0	Low
AT5G05920	root tip	2026-05-13	16	Medium
AT5G05930	root tip	2026-05-11	13	Medium
AT5G05940	root tip	7	11	Medium
AT5G05950	root tip	2026-05-27	30	High
AT5G05960	root tip	217.5	236	High
AT5G05965	root tip	0.55	1	Medium
AT5G05980	root tip	52.5	59	High
AT5G05987	root tip	22	23	Medium
AT5G05990	root tip	20	28	Medium
AT5G06000	root tip	2026-05-09	14	Medium
AT5G06010	root tip	0	0	Low
AT5G06050	root tip	2026-05-25	33	Medium
AT5G06060	root tip	2026-05-30	37	High
AT5G06070	root tip	0.05	0.1	Low
AT5G06080	root tip	1.25	2	Medium
AT5G06090	root tip	11	11	Medium
AT5G06100	root tip	2026-05-11	13	Medium
AT5G06110	root tip	66	86	High
AT5G06120	root tip	2026-05-22	23	Medium
AT5G06130	root tip	34	36	High
AT5G06140	root tip	87.5	91	High
AT5G06150	root tip	29	39	High
AT5G06160	root tip	42	54	High
AT5G06190	root tip	2026-05-04	5	Medium
AT5G06200	root tip	57.5	87	High
AT5G06220	root tip	2026-05-17	19	Medium
AT5G06230	root tip	13	15	Medium
AT5G06240	root tip	2026-05-11	13	Medium
AT5G06270	root tip	2026-05-24	25	Medium
AT5G06280	root tip	2026-05-30	35	High
AT5G06290	root tip	2026-05-20	21	Medium
AT5G06300	root tip	104.5	132	High
AT5G06310	root tip	2026-05-05	6	Medium
AT5G06320	root tip	80.5	90	High
AT5G06340	root tip	2026-05-28	35	High
AT5G06350	root tip	2026-05-11	16	Medium
AT5G06360	root tip	164	229	High
AT5G06370	root tip	53.5	56	High
AT5G06380	root tip	0.35	0.7	Medium
AT5G06390	root tip	72	76	High
AT5G06400	root tip	0.95	1	Medium
AT5G06410	root tip	10	11	Medium
AT5G06430	root tip	6	8	Medium
AT5G06440	root tip	19	20	Medium
AT5G06450	root tip	2026-05-28	33	High
AT5G06460	root tip	36.5	45	High
AT5G06470	root tip	2026-05-03	5	Medium
AT5G06480	root tip	2026-04-01	2	Medium
AT5G08695	root tip	0	0	Low
AT5G16930	root tip	16	23	Medium
AT5G16940	root tip	2026-05-11	13	Medium
AT5G16950	root tip	2026-05-22	28	Medium
AT5G16960	root tip	0.1	0.1	Low
AT5G16970	root tip	21	29	Medium
AT5G16990	root tip	2026-05-05	7	Medium
AT5G17000	root tip	33	35	High
AT5G17010	root tip	2026-05-30	36	High
AT5G17020	root tip	55.5	67	High
AT5G17030	root tip	0	0	Low
AT5G17050	root tip	40.5	42	High
AT5G17060	root tip	26	26	High
AT5G17070	root tip	2026-05-28	32	High
AT5G17090	root tip	0.05	0.1	Low
AT5G17100	root tip	0	0	Low
AT5G17120	root tip	0	0	Low
AT5G17130	root tip	0	0	Low
AT5G17140	root tip	0	0	Low
AT5G17160	root tip	76.5	84	High
AT5G17165	root tip	2026-05-04	7	Medium
AT5G17170	root tip	0.55	1	Medium
AT5G17180	root tip	0	0	Low
AT5G17190	root tip	103	108	High
AT5G17210	root tip	12	15	Medium
AT5G17220	root tip	0.6	0.6	Medium
AT5G17240	root tip	7	9	Medium
AT5G17250	root tip	2026-05-07	9	Medium
AT5G17260	root tip	3	4	Medium
AT5G17270	root tip	2026-05-12	19	Medium
AT5G17290	root tip	2026-05-14	17	Medium
AT5G17300	root tip	2026-05-16	20	Medium
AT5G17310	root tip	2026-05-22	25	Medium
AT5G17320	root tip	0	0	Low
AT5G17330	root tip	730.5	808	High
AT5G17340	root tip	0.55	0.9	Medium
AT5G17350	root tip	2026-05-02	3	Medium
AT5G17360	root tip	2026-05-01	2	Medium
AT5G17370	root tip	2026-05-10	12	Medium
AT5G17380	root tip	159	201	High
AT5G17390	root tip	2026-05-25	34	Medium
AT5G17400	root tip	21	23	Medium
AT5G17410	root tip	2026-05-13	17	Medium
AT5G17420	root tip	34.5	47	High
AT5G17430	root tip	5	9	Medium
AT5G17440	root tip	33.5	39	High
AT5G17450	root tip	2026-05-06	7	Medium
AT5G17460	root tip	32.5	40	High
AT5G17470	root tip	0	0	Low
AT5G17480	root tip	0.1	0.2	Low
AT5G17490	root tip	2026-05-03	5	Medium
AT5G17500	root tip	0	0	Low
AT5G17510	root tip	24	31	Medium
AT5G17540	root tip	2026-05-01	2	Medium
AT5G17550	root tip	40	44	High
AT5G17560	root tip	24	27	Medium
AT5G17580	root tip	2	3	Medium
AT5G17590	root tip	0.2	0.3	Medium
AT5G17600	root tip	2026-05-05	7	Medium
AT5G17610	root tip	40	43	High
AT5G17620	root tip	19	22	Medium
AT5G17630	root tip	35.5	44	High
AT5G17640	root tip	32.5	40	High
AT5G37130	root tip	27	34	High
AT5G42560	root tip	76	85	High
AT5G43610	root tip	0	0	Low
AT5G43755	root tip	0	0	Low
AT1G02490	root	2026-02-01	2	Medium
AT1G07780	root	2026-05-03	4	Medium
AT1G19740	root	43.5	69	High
AT1G21990	root	0.6	1	Medium
AT1G22015	root	0	0	Low
AT1G29870	root	8	16	Medium
AT1G45688	root	59.5	92	High
AT1G50200	root	177.5	199	High
AT1G52950	root	0.05	0.1	Low
AT1G53780	root	127.5	198	High
AT1G53790	root	2026-05-22	40	Medium
AT1G55928	root	0	0	Low
AT2G13770	root	0	0	Low
AT2G16220	root	0	0	Low
AT2G16510	root	72	86	High
AT2G16520	root	0	0	Low
AT2G20920	root	2026-05-23	24	Medium
AT2G20921	root	0	0	Low
AT2G20930	root	42	56	High
AT2G20940	root	2026-05-25	26	Medium
AT2G20950	root	2026-05-26	28	Medium
AT2G20960	root	2026-05-24	41	Medium
AT2G20970	root	0.05	0.1	Low
AT2G20980	root	2026-05-18	25	Medium
AT2G21010	root	0.1	0.1	Low
AT2G21045	root	187.05	374	High
AT2G21050	root	26	47	Medium
AT2G21060	root	81	108	High
AT2G21070	root	2026-05-10	11	Medium
AT2G21080	root	3	4	Medium
AT2G21090	root	2026-05-07	8	Medium
AT2G21100	root	30	55	High
AT2G21110	root	0	0	Low
AT2G21120	root	31	34	High
AT2G21130	root	2026-05-26	40	Medium
AT2G21150	root	54	65	High
AT2G21160	root	305.5	356	High
AT2G21170	root	178	210	High
AT2G21180	root	2026-05-24	31	Medium
AT2G21190	root	56	61	High
AT2G21195	root	2026-05-13	14	Medium
AT2G21200	root	0.15	0.3	Low
AT2G21210	root	2026-05-02	5	Medium
AT2G21220	root	0	0	Low
AT2G21237	root	0.1	0.2	Low
AT2G21240	root	53.5	58	High
AT2G21250	root	103	107	High
AT2G21260	root	0.9	1	Medium
AT2G21270	root	84.5	95	High
AT2G21280	root	10	14	Medium
AT2G21290	root	56	64	High
AT2G21300	root	43	53	High
AT2G21320	root	7	12	Medium
AT2G21330	root	5	8	Medium
AT2G21340	root	13	14	Medium
AT2G21350	root	4	4	Medium
AT2G21380	root	18	20	Medium
AT2G21385	root	2026-05-22	30	Medium
AT2G21390	root	109	119	High
AT2G21400	root	2	4	Medium
AT2G21410	root	34.5	53	High
AT2G21430	root	2026-05-05	8	Medium
AT2G21455	root	0	0	Low
AT2G21465	root	0	0	Low
AT2G21470	root	46.5	58	High
AT2G21480	root	0.05	0.1	Low
AT2G21490	root	0.3	0.6	Medium
AT2G21510	root	0.9	1	Medium
AT2G21520	root	69	96	High
AT2G21530	root	0.7	1	Medium
AT2G21550	root	2026-05-08	14	Medium
AT2G21560	root	2026-05-28	56	Medium
AT2G21580	root	444.5	454	High
AT2G21600	root	88	88	High
AT2G21610	root	1	2	Medium
AT2G21620	root	230.5	363	High
AT2G21630	root	2026-05-10	12	Medium
AT2G21640	root	48.5	92	High
AT2G45250	root	30	32	High
AT3G03341	root	1	2	Medium
AT3G05365	root	0.2	0.2	Low
AT3G09160	root	2026-01-02	4	Medium
AT3G51690	root	2026-05-01	2	Medium
AT3G60245	root	2234	2776	High
AT4G03430	root	59	84	High
AT4G34070	root	2026-05-23	27	Medium
AT4G34660	root	50.5	62	High
AT4G36220	root	17.55	35	Medium
AT4G38140	root	2	3	Medium
AT4G38150	root	2026-05-12	13	Medium
AT4G38160	root	9	10	Medium
AT4G38170	root	10	10	Medium
AT4G38180	root	3	3	Medium
AT4G38190	root	0.05	0.1	Low
AT4G38200	root	2026-05-24	27	Medium
AT4G38210	root	0.25	0.3	Low
AT4G38213	root	0.05	0.1	Low
AT4G38220	root	96.5	139	High
AT4G38225	root	2026-05-16	19	Medium
AT4G38230	root	14	22	Medium
AT4G38250	root	0	0	Low
AT4G38260	root	40.5	62	High
AT4G38270	root	2026-05-25	30	Medium
AT4G38340	root	2026-05-01	2	Medium
AT4G38350	root	48.5	50	High
AT4G38360	root	36.5	50	High
AT4G38370	root	55.5	82	High
AT4G38380	root	13	19	Medium
AT4G38390	root	2026-02-03	6	Medium
AT4G38400	root	11	16	Medium
AT4G38405	root	0	0	Low
AT4G38410	root	2026-05-05	10	Medium
AT4G38420	root	2026-05-04	7	Medium
AT4G38430	root	32.5	45	High
AT4G38440	root	17	24	Medium
AT4G38460	root	34.5	51	High
AT4G38470	root	197	290	High
AT4G38490	root	19	23	Medium
AT4G38495	root	37.5	42	High
AT4G38500	root	2026-05-24	30	Medium
AT4G38510	root	145.5	199	High
AT4G38520	root	35	50	High
AT4G38540	root	35	46	High
AT4G38560	root	0.4	0.8	Medium
AT4G38570	root	27	29	Medium
AT4G38580	root	32.5	36	High
AT4G38590	root	2026-05-01	2	Medium
AT4G38600	root	77	89	High
AT4G38620	root	206.5	360	High
AT4G38630	root	173	187	High
AT4G38640	root	2026-05-21	31	Medium
AT4G38650	root	1.15	2	Medium
AT4G38660	root	2026-05-26	36	Medium
AT4G38680	root	109	157	High
AT4G38690	root	2026-06-01	3	Medium
AT4G38700	root	0.25	0.4	Low
AT4G38710	root	85.5	102	High
AT4G38730	root	10	11	Medium
AT4G38740	root	344	430	High
AT4G38760	root	25	31	Medium
AT4G38770	root	2026-05-20	21	Medium
AT4G38780	root	10	18	Medium
AT4G38790	root	67	73	High
AT4G38800	root	222.5	300	High
AT4G38810	root	21	26	Medium
AT4G38825	root	0	0	Low
AT4G38830	root	3	6	Medium
AT4G38840	root	0.25	0.5	Low
AT4G38850	root	0.05	0.1	Low
AT4G38860	root	0.05	0.1	Low
AT4G38870	root	0	0	Low
AT4G38880	root	0	0	Low
AT4G38890	root	59.5	83	High
AT4G38900	root	33.5	45	High
AT4G38905	root	0.05	0.1	Low
AT4G38940	root	2026-05-16	22	Medium
AT4G38950	root	10	10	Medium
AT4G38970	root	10.85	21	Medium
AT4G38980	root	2026-05-11	13	Medium
AT4G38990	root	0	0	Low
AT4G39000	root	0.2	0.4	Low
AT4G39010	root	0.45	0.8	Medium
AT4G39030	root	2026-05-18	28	Medium
AT4G39040	root	2026-05-30	38	High
AT4G39050	root	46	47	High
AT4G39070	root	2026-05-12	14	Medium
AT4G39080	root	129.5	169	High
AT4G39090	root	642	964	High
AT4G39100	root	49	52	High
AT4G39110	root	2026-05-01	2	Medium
AT4G39120	root	34.5	41	High
AT4G39130	root	0.1	0.2	Low
AT4G39150	root	70	80	High
AT4G39160	root	24	30	Medium
AT4G39170	root	39.5	46	High
AT5G04800	root	164	183	High
AT5G04920	root	42	44	High
AT5G04930	root	34.5	36	High
AT5G04940	root	2026-05-17	22	Medium
AT5G04950	root	97.05	194	High
AT5G04960	root	24	48	Medium
AT5G04970	root	2026-05-03	6	Medium
AT5G04980	root	8	8	Medium
AT5G04990	root	34	45	High
AT5G05000	root	57	68	High
AT5G05010	root	184.5	224	High
AT5G05030	root	0	0	Low
AT5G05040	root	0	0	Low
AT5G05070	root	0.1	0.2	Low
AT5G05080	root	152.5	155	High
AT5G05090	root	0.3	0.5	Medium
AT5G05100	root	77.5	85	High
AT5G05110	root	45.5	68	High
AT5G05113	root	0.35	0.4	Medium
AT5G05120	root	0	0	Low
AT5G05130	root	2026-05-09	14	Medium
AT5G05140	root	79	108	High
AT5G05150	root	0	0	Low
AT5G05160	root	25	48	Medium
AT5G05170	root	162	225	High
AT5G05180	root	55	87	High
AT5G05190	root	2026-05-09	12	Medium
AT5G05200	root	45.5	61	High
AT5G05210	root	81.5	105	High
AT5G05220	root	0.25	0.5	Low
AT5G05230	root	38	48	High
AT5G05250	root	2026-06-06	13	Medium
AT5G05260	root	0.05	0.1	Low
AT5G05280	root	0.35	0.7	Medium
AT5G05290	root	0.05	0.1	Low
AT5G05300	root	2026-05-01	2	Medium
AT5G05330	root	2026-05-05	8	Medium
AT5G05340	root	2026-05-08	15	Medium
AT5G05350	root	1	1	Medium
AT5G05360	root	2026-05-31	37	High
AT5G05365	root	16	24	Medium
AT5G05370	root	139	163	High
AT5G05380	root	2026-05-09	13	Medium
AT5G05390	root	2026-01-01	2	Medium
AT5G05410	root	42.5	69	High
AT5G05430	root	2026-05-04	7	Medium
AT5G05440	root	2026-05-31	55	High
AT5G05450	root	34.5	42	High
AT5G05460	root	30	37	High
AT5G05470	root	48	57	High
AT5G05480	root	11	15	Medium
AT5G05490	root	2.25	4	Medium
AT5G05500	root	2026-08-27	55	Medium
AT5G05510	root	2026-05-14	19	Medium
AT5G05520	root	49.5	58	High
AT5G05530	root	2026-05-01	2	Medium
AT5G05540	root	33.5	40	High
AT5G05550	root	2026-05-10	15	Medium
AT5G05570	root	2026-05-24	28	Medium
AT5G05580	root	2026-05-12	20	Medium
AT5G05600	root	19	37	Medium
AT5G05610	root	70	75	High
AT5G05620	root	2026-05-27	34	Medium
AT5G05630	root	2	2	Medium
AT5G05640	root	2026-05-12	13	Medium
AT5G05657	root	0.2	0.4	Low
AT5G05660	root	2026-05-29	33	High
AT5G05670	root	46	57	High
AT5G05680	root	26	34	Medium
AT5G05690	root	2026-05-16	25	Medium
AT5G05710	root	2026-05-12	14	Medium
AT5G05730	root	59.5	61	High
AT5G05760	root	17	26	Medium
AT5G05770	root	14.35	28	Medium
AT5G05780	root	171	173	High
AT5G05790	root	25	41	Medium
AT5G05810	root	2	3	Medium
AT5G05820	root	2026-05-22	25	Medium
AT5G05830	root	2026-05-12	14	Medium
AT5G05840	root	2	4	Medium
AT5G05850	root	2026-05-24	36	Medium
AT5G05860	root	64	97	High
AT5G05870	root	10	11	Medium
AT5G05880	root	2026-05-14	16	Medium
AT5G05890	root	22	37	Medium
AT5G05900	root	2026-05-02	5	Medium
AT5G05910	root	0	0	Low
AT5G05920	root	2026-05-20	25	Medium
AT5G05930	root	13	13	Medium
AT5G05940	root	22	36	Medium
AT5G05950	root	28	33	Medium
AT5G05960	root	151.5	302	High
AT5G05965	root	0.5	1	Medium
AT5G05980	root	52.5	53	High
AT5G05987	root	30	35	High
AT5G05990	root	42	60	High
AT5G06000	root	18	22	Medium
AT5G06010	root	0.05	0.1	Low
AT5G06050	root	24	26	Medium
AT5G06060	root	51	61	High
AT5G06070	root	2026-01-01	2	Medium
AT5G06080	root	68.5	136	High
AT5G06090	root	2026-05-06	12	Medium
AT5G06100	root	17	18	Medium
AT5G06110	root	84.5	93	High
AT5G06120	root	27	35	Medium
AT5G06130	root	35	36	High
AT5G06140	root	94.5	105	High
AT5G06150	root	49	65	High
AT5G06160	root	64.5	89	High
AT5G06190	root	2026-05-23	41	Medium
AT5G06200	root	6	10	Medium
AT5G06220	root	16	20	Medium
AT5G06230	root	7	12	Medium
AT5G06240	root	2026-05-20	25	Medium
AT5G06270	root	2026-01-11	22	Medium
AT5G06280	root	2026-05-20	27	Medium
AT5G06290	root	2026-05-22	24	Medium
AT5G06300	root	31	56	High
AT5G06310	root	2026-05-06	7	Medium
AT5G06320	root	330	523	High
AT5G06340	root	39	44	High
AT5G06350	root	2026-05-19	24	Medium
AT5G06360	root	295	350	High
AT5G06370	root	64.5	67	High
AT5G06380	root	0.4	0.6	Medium
AT5G06390	root	29	47	Medium
AT5G06400	root	2026-05-01	2	Medium
AT5G06410	root	2026-05-15	18	Medium
AT5G06430	root	8	9	Medium
AT5G06440	root	17	17	Medium
AT5G06450	root	2026-05-28	33	Medium
AT5G06460	root	52.5	66	High
AT5G06470	root	2026-06-01	3	Medium
AT5G06480	root	2026-05-05	8	Medium
AT5G08695	root	0.1	0.2	Low
AT5G16930	root	42	67	High
AT5G16940	root	2026-05-06	8	Medium
AT5G16950	root	28	33	Medium
AT5G16960	root	2.55	5	Medium
AT5G16970	root	99.5	179	High
AT5G16990	root	38.5	71	High
AT5G17000	root	42.5	64	High
AT5G17010	root	2026-05-29	43	High
AT5G17020	root	95	137	High
AT5G17030	root	0	0	Low
AT5G17050	root	22	22	Medium
AT5G17060	root	2026-05-30	35	High
AT5G17070	root	47.5	63	High
AT5G17090	root	49.5	99	High
AT5G17100	root	7	14	Medium
AT5G17120	root	0	0	Low
AT5G17130	root	0	0	Low
AT5G17140	root	0	0	Low
AT5G17160	root	98.5	137	High
AT5G17165	root	2026-05-02	5	Medium
AT5G17170	root	3	4	Medium
AT5G17180	root	0.15	0.2	Low
AT5G17190	root	123.5	151	High
AT5G17210	root	2026-05-25	36	Medium
AT5G17220	root	4	8	Medium
AT5G17240	root	2026-05-10	15	Medium
AT5G17250	root	13	17	Medium
AT5G17260	root	2026-05-01	3	Medium
AT5G17270	root	34.5	55	High
AT5G17290	root	15	17	Medium
AT5G17300	root	19	21	Medium
AT5G17310	root	52	85	High
AT5G17320	root	2	4	Medium
AT5G17330	root	610	759	High
AT5G17340	root	0	0	Low
AT5G17350	root	9	15	Medium
AT5G17360	root	2026-03-01	2	Medium
AT5G17370	root	2026-05-16	24	Medium
AT5G17380	root	110.5	114	High
AT5G17390	root	2026-06-05	11	Medium
AT5G17400	root	23	24	Medium
AT5G17410	root	2026-05-25	35	Medium
AT5G17420	root	11	17	Medium
AT5G17430	root	65.5	124	High
AT5G17440	root	61	83	High
AT5G17450	root	2026-05-02	4	Medium
AT5G17460	root	2026-05-18	22	Medium
AT5G17470	root	0	0	Low
AT5G17480	root	0.15	0.3	Low
AT5G17490	root	30	52	High
AT5G17500	root	0.25	0.5	Low
AT5G17510	root	49	72	High
AT5G17540	root	2	2	Medium
AT5G17550	root	48.5	58	High
AT5G17560	root	52	71	High
AT5G17580	root	2026-05-06	11	Medium
AT5G17590	root	0.05	0.1	Low
AT5G17600	root	2026-09-02	5	Medium
AT5G17610	root	47.5	59	High
AT5G17620	root	32.5	43	High
AT5G17630	root	46	59	High
AT5G17640	root	32	33	High
AT5G37130	root	49.5	72	High
AT5G42560	root	92.5	111	High
AT5G43610	root	0	0	Low
AT5G43755	root	0.05	0.1	Low
AT1G02490	adult vascular leaf	0	0	Low
AT1G02490	cauline leaf	0	0	Low
AT1G02490	rosette leaf	0.2	1	Medium
AT1G07780	adult vascular leaf	0.5	0.5	Medium
AT1G07780	cauline leaf	0.8	0.8	Medium
AT1G07780	rosette leaf	1.57142857142857	4	Medium
AT1G19740	adult vascular leaf	91	91	High
AT1G19740	cauline leaf	253	253	High
AT1G19740	rosette leaf	132.714285714286	159	High
AT1G21990	adult vascular leaf	0	0	Low
AT1G21990	cauline leaf	0	0	Low
AT1G21990	rosette leaf	0	0	Low
AT1G22015	adult vascular leaf	0.1	0.1	Medium
AT1G22015	cauline leaf	0	0	Low
AT1G22015	rosette leaf	0	0	Low
AT1G29870	adult vascular leaf	0	0	Low
AT1G29870	cauline leaf	0	0	Low
AT1G29870	rosette leaf	0	0	Low
AT1G45688	adult vascular leaf	31	31	High
AT1G45688	cauline leaf	55	55	High
AT1G45688	rosette leaf	72.6428571428571	99	High
AT1G50200	adult vascular leaf	95	95	High
AT1G50200	cauline leaf	96	96	High
AT1G50200	rosette leaf	93.8571428571429	128	High
AT1G52950	adult vascular leaf	0.1	0.1	Medium
AT1G52950	cauline leaf	0.1	0.1	Medium
AT1G52950	rosette leaf	0.0428571428571429	0.2	Medium
AT1G53780	adult vascular leaf	144	144	High
AT1G53780	cauline leaf	107	107	High
AT1G53780	rosette leaf	56.0714285714286	105	High
AT1G53790	adult vascular leaf	9	9	Medium
AT1G53790	cauline leaf	5	5	Medium
AT1G53790	rosette leaf	2.64285714285714	5	Medium
AT1G55928	adult vascular leaf	0	0	Low
AT1G55928	cauline leaf	0	0	Low
AT1G55928	rosette leaf	0	0	Low
AT2G13770	adult vascular leaf	0.1	0.1	Medium
AT2G13770	cauline leaf	0	0	Low
AT2G13770	rosette leaf	0.0571428571428571	0.2	Medium
AT2G16220	adult vascular leaf	0	0	Low
AT2G16220	cauline leaf	0	0	Low
AT2G16220	rosette leaf	0	0	Low
AT2G16510	adult vascular leaf	109	109	High
AT2G16510	cauline leaf	90	90	High
AT2G16510	rosette leaf	76.3571428571429	104	High
AT2G16520	adult vascular leaf	0	0	Low
AT2G16520	cauline leaf	0	0	Low
AT2G16520	rosette leaf	0	0	Low
AT2G20920	adult vascular leaf	376	376	High
AT2G20920	cauline leaf	215	215	High
AT2G20920	rosette leaf	73.7857142857143	137	High
AT2G20921	adult vascular leaf	1	1	Medium
AT2G20921	cauline leaf	0	0	Low
AT2G20921	rosette leaf	0.0785714285714286	0.6	Medium
AT2G20930	adult vascular leaf	17	17	Medium
AT2G20930	cauline leaf	42	42	High
AT2G20930	rosette leaf	54.6428571428571	65	High
AT2G20940	adult vascular leaf	4	4	Medium
AT2G20940	cauline leaf	7	7	Medium
AT2G20940	rosette leaf	7.78571428571429	17	Medium
AT2G20950	adult vascular leaf	31	31	High
AT2G20950	cauline leaf	52	52	High
AT2G20950	rosette leaf	21.8571428571429	34	Medium
AT2G20960	adult vascular leaf	209	209	High
AT2G20960	cauline leaf	78	78	High
AT2G20960	rosette leaf	91.5714285714286	123	High
AT2G20970	adult vascular leaf	0	0	Low
AT2G20970	cauline leaf	0	0	Low
AT2G20970	rosette leaf	0	0	Low
AT2G20980	adult vascular leaf	0.1	0.1	Medium
AT2G20980	cauline leaf	0.1	0.1	Medium
AT2G20980	rosette leaf	3.21428571428571	5	Medium
AT2G21010	adult vascular leaf	0	0	Low
AT2G21010	cauline leaf	0.1	0.1	Medium
AT2G21010	rosette leaf	0	0	Low
AT2G21045	adult vascular leaf	0	0	Low
AT2G21045	cauline leaf	0	0	Low
AT2G21045	rosette leaf	0.0142857142857143	0.1	Low
AT2G21050	adult vascular leaf	1	1	Medium
AT2G21050	cauline leaf	4	4	Medium
AT2G21050	rosette leaf	11.4071428571429	37	Medium
AT2G21060	adult vascular leaf	28	28	High
AT2G21060	cauline leaf	16	16	Medium
AT2G21060	rosette leaf	15.6428571428571	26	Medium
AT2G21070	adult vascular leaf	3	3	Medium
AT2G21070	cauline leaf	5	5	Medium
AT2G21070	rosette leaf	6.71428571428571	10	Medium
AT2G21080	adult vascular leaf	1	1	Medium
AT2G21080	cauline leaf	9	9	Medium
AT2G21080	rosette leaf	16.3571428571429	31	Medium
AT2G21090	adult vascular leaf	1	1	Medium
AT2G21090	cauline leaf	3	3	Medium
AT2G21090	rosette leaf	4.21428571428571	8	Medium
AT2G21100	adult vascular leaf	1	1	Medium
AT2G21100	cauline leaf	0.3	0.3	Medium
AT2G21100	rosette leaf	0	0	Low
AT2G21110	adult vascular leaf	0	0	Low
AT2G21110	cauline leaf	0	0	Low
AT2G21110	rosette leaf	0	0	Low
AT2G21120	adult vascular leaf	56	56	High
AT2G21120	cauline leaf	42	42	High
AT2G21120	rosette leaf	54.7142857142857	77	High
AT2G21130	adult vascular leaf	42	42	High
AT2G21130	cauline leaf	28	28	High
AT2G21130	rosette leaf	20.6428571428571	32	Medium
AT2G21150	adult vascular leaf	25	25	High
AT2G21150	cauline leaf	24	24	High
AT2G21150	rosette leaf	2026-05-20	26	Medium
AT2G21160	adult vascular leaf	80	80	High
AT2G21160	cauline leaf	72	72	High
AT2G21160	rosette leaf	139.357142857143	207	High
AT2G21170	adult vascular leaf	105	105	High
AT2G21170	cauline leaf	341	341	High
AT2G21170	rosette leaf	444.5	542	High
AT2G21180	adult vascular leaf	41	41	High
AT2G21180	cauline leaf	11	11	Medium
AT2G21180	rosette leaf	5.42857142857143	9	Medium
AT2G21190	adult vascular leaf	160	160	High
AT2G21190	cauline leaf	59	59	High
AT2G21190	rosette leaf	45.6428571428571	60	High
AT2G21195	adult vascular leaf	9	9	Medium
AT2G21195	cauline leaf	24	24	High
AT2G21195	rosette leaf	23	35	High
AT2G21200	adult vascular leaf	0	0	Low
AT2G21200	cauline leaf	2	2	Medium
AT2G21200	rosette leaf	2.92857142857143	6	Medium
AT2G21210	adult vascular leaf	4	4	Medium
AT2G21210	cauline leaf	25	25	High
AT2G21210	rosette leaf	61.2857142857143	115	High
AT2G21220	adult vascular leaf	0	0	Low
AT2G21220	cauline leaf	0.9	0.9	Medium
AT2G21220	rosette leaf	1.90714285714286	5	Medium
AT2G21237	adult vascular leaf	0	0	Low
AT2G21237	cauline leaf	0	0	Low
AT2G21237	rosette leaf	0.0142857142857143	0.2	Low
AT2G21240	adult vascular leaf	51	51	High
AT2G21240	cauline leaf	79	79	High
AT2G21240	rosette leaf	51.0714285714286	62	High
AT2G21250	adult vascular leaf	75	75	High
AT2G21250	cauline leaf	125	125	High
AT2G21250	rosette leaf	108.714285714286	134	High
AT2G21260	adult vascular leaf	2	2	Medium
AT2G21260	cauline leaf	0.2	0.2	Medium
AT2G21260	rosette leaf	0.442857142857143	1	Medium
AT2G21270	adult vascular leaf	134	134	High
AT2G21270	cauline leaf	92	92	High
AT2G21270	rosette leaf	51.2142857142857	68	High
AT2G21280	adult vascular leaf	19	19	Medium
AT2G21280	cauline leaf	51	51	High
AT2G21280	rosette leaf	76.5714285714286	103	High
AT2G21290	adult vascular leaf	33	33	High
AT2G21290	cauline leaf	61	61	High
AT2G21290	rosette leaf	46	56	High
AT2G21300	adult vascular leaf	13	13	Medium
AT2G21300	cauline leaf	17	17	Medium
AT2G21300	rosette leaf	16.9285714285714	27	Medium
AT2G21320	adult vascular leaf	24	24	High
AT2G21320	cauline leaf	28	28	High
AT2G21320	rosette leaf	15.9285714285714	34	Medium
AT2G21330	adult vascular leaf	127	127	High
AT2G21330	cauline leaf	517	517	High
AT2G21330	rosette leaf	482.214285714286	906	High
AT2G21340	adult vascular leaf	27	27	High
AT2G21340	cauline leaf	57	57	High
AT2G21340	rosette leaf	44.6428571428571	53	High
AT2G21350	adult vascular leaf	3	3	Medium
AT2G21350	cauline leaf	6	6	Medium
AT2G21350	rosette leaf	3.07142857142857	7	Medium
AT2G21380	adult vascular leaf	24	24	High
AT2G21380	cauline leaf	30	30	High
AT2G21380	rosette leaf	41.0714285714286	61	High
AT2G21385	adult vascular leaf	21	21	Medium
AT2G21385	cauline leaf	66	66	High
AT2G21385	rosette leaf	90.1428571428571	153	High
AT2G21390	adult vascular leaf	55	55	High
AT2G21390	cauline leaf	51	51	High
AT2G21390	rosette leaf	73.7142857142857	88	High
AT2G21400	adult vascular leaf	0	0	Low
AT2G21400	cauline leaf	0	0	Low
AT2G21400	rosette leaf	0.00714285714285714	0.1	Low
AT2G21410	adult vascular leaf	45	45	High
AT2G21410	cauline leaf	38	38	High
AT2G21410	rosette leaf	42.0714285714286	54	High
AT2G21430	adult vascular leaf	8	8	Medium
AT2G21430	cauline leaf	3	3	Medium
AT2G21430	rosette leaf	1.27857142857143	3	Medium
AT2G21455	adult vascular leaf	0	0	Low
AT2G21455	cauline leaf	0	0	Low
AT2G21455	rosette leaf	0.0142857142857143	0.2	Low
AT2G21465	adult vascular leaf	0	0	Low
AT2G21465	cauline leaf	0	0	Low
AT2G21465	rosette leaf	0	0	Low
AT2G21470	adult vascular leaf	56	56	High
AT2G21470	cauline leaf	40	40	High
AT2G21470	rosette leaf	31.2857142857143	44	High
AT2G21480	adult vascular leaf	0.3	0.3	Medium
AT2G21480	cauline leaf	0	0	Low
AT2G21480	rosette leaf	0	0	Low
AT2G21490	adult vascular leaf	2	2	Medium
AT2G21490	cauline leaf	1	1	Medium
AT2G21490	rosette leaf	0.364285714285714	0.9	Medium
AT2G21510	adult vascular leaf	34	34	High
AT2G21510	cauline leaf	0.2	0.2	Medium
AT2G21510	rosette leaf	0.885714285714286	2	Medium
AT2G21520	adult vascular leaf	85	85	High
AT2G21520	cauline leaf	52	52	High
AT2G21520	rosette leaf	71.9285714285714	85	High
AT2G21530	adult vascular leaf	24	24	High
AT2G21530	cauline leaf	190	190	High
AT2G21530	rosette leaf	194.071428571429	248	High
AT2G21550	adult vascular leaf	2	2	Medium
AT2G21550	cauline leaf	0.6	0.6	Medium
AT2G21550	rosette leaf	3.14285714285714	7	Medium
AT2G21560	adult vascular leaf	33	33	High
AT2G21560	cauline leaf	39	39	High
AT2G21560	rosette leaf	12	30	Medium
AT2G21580	adult vascular leaf	65	65	High
AT2G21580	cauline leaf	74	74	High
AT2G21580	rosette leaf	162.428571428571	334	High
AT2G21600	adult vascular leaf	78	78	High
AT2G21600	cauline leaf	75	75	High
AT2G21600	rosette leaf	70.5714285714286	81	High
AT2G21610	adult vascular leaf	0.1	0.1	Medium
AT2G21610	cauline leaf	0	0	Low
AT2G21610	rosette leaf	0.0142857142857143	0.1	Low
AT2G21620	adult vascular leaf	603	603	High
AT2G21620	cauline leaf	338	338	High
AT2G21620	rosette leaf	156.642857142857	259	High
AT2G21630	adult vascular leaf	6	6	Medium
AT2G21630	cauline leaf	11	11	Medium
AT2G21630	rosette leaf	9.42857142857143	12	Medium
AT2G21640	adult vascular leaf	9	9	Medium
AT2G21640	cauline leaf	10	10	Medium
AT2G21640	rosette leaf	9.07142857142857	20	Medium
AT2G45250	adult vascular leaf	21	21	Medium
AT2G45250	cauline leaf	32	32	High
AT2G45250	rosette leaf	25.9285714285714	34	High
AT3G03341	adult vascular leaf	7	7	Medium
AT3G03341	cauline leaf	1	1	Medium
AT3G03341	rosette leaf	2026-07-03	21	Medium
AT3G05365	adult vascular leaf	0.2	0.2	Medium
AT3G05365	cauline leaf	0.2	0.2	Medium
AT3G05365	rosette leaf	0.264285714285714	0.6	Medium
AT3G09160	adult vascular leaf	4	4	Medium
AT3G09160	cauline leaf	8	8	Medium
AT3G09160	rosette leaf	4.42857142857143	12	Medium
AT3G51690	adult vascular leaf	0	0	Low
AT3G51690	cauline leaf	0	0	Low
AT3G51690	rosette leaf	0	0	Low
AT3G60245	adult vascular leaf	125	125	High
AT3G60245	cauline leaf	175	175	High
AT3G60245	rosette leaf	447.428571428571	941	High
AT4G03430	adult vascular leaf	38	38	High
AT4G03430	cauline leaf	26	26	High
AT4G03430	rosette leaf	24.6428571428571	31	High
AT4G34070	adult vascular leaf	18	18	Medium
AT4G34070	cauline leaf	33	33	High
AT4G34070	rosette leaf	21.0714285714286	32	Medium
AT4G34660	adult vascular leaf	34	34	High
AT4G34660	cauline leaf	30	30	High
AT4G34660	rosette leaf	26	29	High
AT4G36220	adult vascular leaf	142	142	High
AT4G36220	cauline leaf	44	44	High
AT4G36220	rosette leaf	81.2142857142857	206	High
AT4G38140	adult vascular leaf	0	0	Low
AT4G38140	cauline leaf	0	0	Low
AT4G38140	rosette leaf	0.0142857142857143	0.2	Low
AT4G38150	adult vascular leaf	5	5	Medium
AT4G38150	cauline leaf	7	7	Medium
AT4G38150	rosette leaf	7	12	Medium
AT4G38160	adult vascular leaf	5	5	Medium
AT4G38160	cauline leaf	25	25	High
AT4G38160	rosette leaf	55.1428571428571	122	High
AT4G38170	adult vascular leaf	7	7	Medium
AT4G38170	cauline leaf	7	7	Medium
AT4G38170	rosette leaf	7.35714285714286	10	Medium
AT4G38180	adult vascular leaf	2	2	Medium
AT4G38180	cauline leaf	2	2	Medium
AT4G38180	rosette leaf	1.92857142857143	3	Medium
AT4G38190	adult vascular leaf	0.3	0.3	Medium
AT4G38190	cauline leaf	0	0	Low
AT4G38190	rosette leaf	0.00714285714285714	0.1	Low
AT4G38200	adult vascular leaf	17	17	Medium
AT4G38200	cauline leaf	11	11	Medium
AT4G38200	rosette leaf	14.7857142857143	18	Medium
AT4G38210	adult vascular leaf	0	0	Low
AT4G38210	cauline leaf	0.3	0.3	Medium
AT4G38210	rosette leaf	0.0857142857142857	0.3	Medium
AT4G38213	adult vascular leaf	0.4	0.4	Medium
AT4G38213	cauline leaf	0.4	0.4	Medium
AT4G38213	rosette leaf	0.135714285714286	0.3	Medium
AT4G38220	adult vascular leaf	56	56	High
AT4G38220	cauline leaf	79	79	High
AT4G38220	rosette leaf	59.5	78	High
AT4G38225	adult vascular leaf	49	49	High
AT4G38225	cauline leaf	64	64	High
AT4G38225	rosette leaf	63.4285714285714	76	High
AT4G38230	adult vascular leaf	14	14	Medium
AT4G38230	cauline leaf	15	15	Medium
AT4G38230	rosette leaf	7.35714285714286	11	Medium
AT4G38250	adult vascular leaf	0	0	Low
AT4G38250	cauline leaf	0	0	Low
AT4G38250	rosette leaf	0	0	Low
AT4G38260	adult vascular leaf	68	68	High
AT4G38260	cauline leaf	49	49	High
AT4G38260	rosette leaf	25.7142857142857	45	High
AT4G38270	adult vascular leaf	22	22	Medium
AT4G38270	cauline leaf	23	23	High
AT4G38270	rosette leaf	16.7857142857143	21	Medium
AT4G38340	adult vascular leaf	8	8	Medium
AT4G38340	cauline leaf	3	3	Medium
AT4G38340	rosette leaf	9.08571428571429	52	Medium
AT4G38350	adult vascular leaf	32	32	High
AT4G38350	cauline leaf	35	35	High
AT4G38350	rosette leaf	36.1428571428571	53	High
AT4G38360	adult vascular leaf	87	87	High
AT4G38360	cauline leaf	66	66	High
AT4G38360	rosette leaf	47.5	67	High
AT4G38370	adult vascular leaf	4	4	Medium
AT4G38370	cauline leaf	13	13	Medium
AT4G38370	rosette leaf	11.7142857142857	25	Medium
AT4G38380	adult vascular leaf	10	10	Medium
AT4G38380	cauline leaf	5	5	Medium
AT4G38380	rosette leaf	3.14285714285714	6	Medium
AT4G38390	adult vascular leaf	0	0	Low
AT4G38390	cauline leaf	0	0	Low
AT4G38390	rosette leaf	0.05	0.2	Medium
AT4G38400	adult vascular leaf	0.3	0.3	Medium
AT4G38400	cauline leaf	0.6	0.6	Medium
AT4G38400	rosette leaf	7.57142857142857	18	Medium
AT4G38405	adult vascular leaf	0	0	Low
AT4G38405	cauline leaf	0	0	Low
AT4G38405	rosette leaf	0	0	Low
AT4G38410	adult vascular leaf	0	0	Low
AT4G38410	cauline leaf	0.1	0.1	Medium
AT4G38410	rosette leaf	0.978571428571429	5	Medium
AT4G38420	adult vascular leaf	34	34	High
AT4G38420	cauline leaf	14	14	Medium
AT4G38420	rosette leaf	16	34	Medium
AT4G38430	adult vascular leaf	9	9	Medium
AT4G38430	cauline leaf	43	43	High
AT4G38430	rosette leaf	40.7857142857143	62	High
AT4G38440	adult vascular leaf	10	10	Medium
AT4G38440	cauline leaf	9	9	Medium
AT4G38440	rosette leaf	7.64285714285714	13	Medium
AT4G38460	adult vascular leaf	86	86	High
AT4G38460	cauline leaf	174	174	High
AT4G38460	rosette leaf	78.2142857142857	123	High
AT4G38470	adult vascular leaf	75	75	High
AT4G38470	cauline leaf	30	30	High
AT4G38470	rosette leaf	91.2857142857143	136	High
AT4G38490	adult vascular leaf	20	20	Medium
AT4G38490	cauline leaf	52	52	High
AT4G38490	rosette leaf	38.1428571428571	53	High
AT4G38495	adult vascular leaf	34	34	High
AT4G38495	cauline leaf	49	49	High
AT4G38495	rosette leaf	27.9285714285714	55	High
AT4G38500	adult vascular leaf	22	22	Medium
AT4G38500	cauline leaf	23	23	High
AT4G38500	rosette leaf	20.7857142857143	25	Medium
AT4G38510	adult vascular leaf	107	107	High
AT4G38510	cauline leaf	89	89	High
AT4G38510	rosette leaf	118.285714285714	150	High
AT4G38520	adult vascular leaf	23	23	High
AT4G38520	cauline leaf	78	78	High
AT4G38520	rosette leaf	36.1428571428571	52	High
AT4G38540	adult vascular leaf	34	34	High
AT4G38540	cauline leaf	42	42	High
AT4G38540	rosette leaf	14.0714285714286	43	Medium
AT4G38560	adult vascular leaf	10	10	Medium
AT4G38560	cauline leaf	4	4	Medium
AT4G38560	rosette leaf	11.5714285714286	25	Medium
AT4G38570	adult vascular leaf	13	13	Medium
AT4G38570	cauline leaf	22	22	Medium
AT4G38570	rosette leaf	15.0714285714286	19	Medium
AT4G38580	adult vascular leaf	17	17	Medium
AT4G38580	cauline leaf	27	27	High
AT4G38580	rosette leaf	13.5714285714286	22	Medium
AT4G38590	adult vascular leaf	0	0	Low
AT4G38590	cauline leaf	0	0	Low
AT4G38590	rosette leaf	0.0214285714285714	0.1	Medium
AT4G38600	adult vascular leaf	82	82	High
AT4G38600	cauline leaf	35	35	High
AT4G38600	rosette leaf	45.7142857142857	56	High
AT4G38620	adult vascular leaf	11	11	Medium
AT4G38620	cauline leaf	28	28	High
AT4G38620	rosette leaf	12.9285714285714	22	Medium
AT4G38630	adult vascular leaf	135	135	High
AT4G38630	cauline leaf	107	107	High
AT4G38630	rosette leaf	87.3571428571429	108	High
AT4G38640	adult vascular leaf	22	22	Medium
AT4G38640	cauline leaf	34	34	High
AT4G38640	rosette leaf	24.0714285714286	32	High
AT4G38650	adult vascular leaf	0.3	0.3	Medium
AT4G38650	cauline leaf	3	3	Medium
AT4G38650	rosette leaf	3.28571428571429	9	Medium
AT4G38660	adult vascular leaf	0.2	0.2	Medium
AT4G38660	cauline leaf	2	2	Medium
AT4G38660	rosette leaf	5.51428571428571	16	Medium
AT4G38680	adult vascular leaf	31	31	High
AT4G38680	cauline leaf	46	46	High
AT4G38680	rosette leaf	45.3571428571429	65	High
AT4G38690	adult vascular leaf	5	5	Medium
AT4G38690	cauline leaf	46	46	High
AT4G38690	rosette leaf	35	70	High
AT4G38700	adult vascular leaf	0.1	0.1	Medium
AT4G38700	cauline leaf	4	4	Medium
AT4G38700	rosette leaf	3.06428571428571	5	Medium
AT4G38710	adult vascular leaf	50	50	High
AT4G38710	cauline leaf	48	48	High
AT4G38710	rosette leaf	42.2142857142857	60	High
AT4G38730	adult vascular leaf	34	34	High
AT4G38730	cauline leaf	21	21	Medium
AT4G38730	rosette leaf	9.35714285714286	14	Medium
AT4G38740	adult vascular leaf	457	457	High
AT4G38740	cauline leaf	878	878	High
AT4G38740	rosette leaf	258.5	433	High
AT4G38760	adult vascular leaf	12	12	Medium
AT4G38760	cauline leaf	16	16	Medium
AT4G38760	rosette leaf	20.0714285714286	25	Medium
AT4G38770	adult vascular leaf	3	3	Medium
AT4G38770	cauline leaf	68	68	High
AT4G38770	rosette leaf	251.428571428571	514	High
AT4G38780	adult vascular leaf	2	2	Medium
AT4G38780	cauline leaf	0.4	0.4	Medium
AT4G38780	rosette leaf	0.378571428571429	1	Medium
AT4G38790	adult vascular leaf	42	42	High
AT4G38790	cauline leaf	38	38	High
AT4G38790	rosette leaf	35.0714285714286	53	High
AT4G38800	adult vascular leaf	146	146	High
AT4G38800	cauline leaf	206	206	High
AT4G38800	rosette leaf	155.714285714286	244	High
AT4G38810	adult vascular leaf	31	31	High
AT4G38810	cauline leaf	50	50	High
AT4G38810	rosette leaf	44.2142857142857	73	High
AT4G38825	adult vascular leaf	0	0	Low
AT4G38825	cauline leaf	0	0	Low
AT4G38825	rosette leaf	0.0428571428571429	0.4	Medium
AT4G38830	adult vascular leaf	0.8	0.8	Medium
AT4G38830	cauline leaf	0.2	0.2	Medium
AT4G38830	rosette leaf	0.7	3	Medium
AT4G38840	adult vascular leaf	6	6	Medium
AT4G38840	cauline leaf	54	54	High
AT4G38840	rosette leaf	78.4285714285714	127	High
AT4G38850	adult vascular leaf	0.4	0.4	Medium
AT4G38850	cauline leaf	5	5	Medium
AT4G38850	rosette leaf	14.7142857142857	31	Medium
AT4G38860	adult vascular leaf	2	2	Medium
AT4G38860	cauline leaf	65	65	High
AT4G38860	rosette leaf	76.8571428571429	106	High
AT4G38870	adult vascular leaf	7	7	Medium
AT4G38870	cauline leaf	0.3	0.3	Medium
AT4G38870	rosette leaf	2.34285714285714	14	Medium
AT4G38880	adult vascular leaf	0.1	0.1	Medium
AT4G38880	cauline leaf	0.1	0.1	Medium
AT4G38880	rosette leaf	0.978571428571429	5	Medium
AT4G38890	adult vascular leaf	13	13	Medium
AT4G38890	cauline leaf	30	30	High
AT4G38890	rosette leaf	28.6428571428571	41	High
AT4G38900	adult vascular leaf	16	16	Medium
AT4G38900	cauline leaf	16	16	Medium
AT4G38900	rosette leaf	21.5714285714286	27	Medium
AT4G38905	adult vascular leaf	0	0	Low
AT4G38905	cauline leaf	0	0	Low
AT4G38905	rosette leaf	0.0142857142857143	0.1	Low
AT4G38940	adult vascular leaf	16	16	Medium
AT4G38940	cauline leaf	8	8	Medium
AT4G38940	rosette leaf	9	13	Medium
AT4G38950	adult vascular leaf	0.4	0.4	Medium
AT4G38950	cauline leaf	2	2	Medium
AT4G38950	rosette leaf	20.5714285714286	84	Medium
AT4G38970	adult vascular leaf	276	276	High
AT4G38970	cauline leaf	1252	1252	High
AT4G38970	rosette leaf	1244.57142857143	1666	High
AT4G38980	adult vascular leaf	15	15	Medium
AT4G38980	cauline leaf	15	15	Medium
AT4G38980	rosette leaf	11.6428571428571	18	Medium
AT4G38990	adult vascular leaf	0	0	Low
AT4G38990	cauline leaf	0	0	Low
AT4G38990	rosette leaf	0	0	Low
AT4G39000	adult vascular leaf	0	0	Low
AT4G39000	cauline leaf	0	0	Low
AT4G39000	rosette leaf	0.0142857142857143	0.1	Low
AT4G39010	adult vascular leaf	1	1	Medium
AT4G39010	cauline leaf	0.6	0.6	Medium
AT4G39010	rosette leaf	1.53571428571429	5	Medium
AT4G39030	adult vascular leaf	31	31	High
AT4G39030	cauline leaf	4	4	Medium
AT4G39030	rosette leaf	19.8571428571429	67	Medium
AT4G39040	adult vascular leaf	21	21	Medium
AT4G39040	cauline leaf	87	87	High
AT4G39040	rosette leaf	105.357142857143	212	High
AT4G39050	adult vascular leaf	17	17	Medium
AT4G39050	cauline leaf	23	23	High
AT4G39050	rosette leaf	34.8571428571429	43	High
AT4G39070	adult vascular leaf	0.9	0.9	Medium
AT4G39070	cauline leaf	0.9	0.9	Medium
AT4G39070	rosette leaf	3.61428571428571	6	Medium
AT4G39080	adult vascular leaf	153	153	High
AT4G39080	cauline leaf	103	103	High
AT4G39080	rosette leaf	160.714285714286	222	High
AT4G39090	adult vascular leaf	1706	1706	High
AT4G39090	cauline leaf	1893	1893	High
AT4G39090	rosette leaf	729.142857142857	1060	High
AT4G39100	adult vascular leaf	64	64	High
AT4G39100	cauline leaf	88	88	High
AT4G39100	rosette leaf	48.7857142857143	86	High
AT4G39110	adult vascular leaf	2	2	Medium
AT4G39110	cauline leaf	0.5	0.5	Medium
AT4G39110	rosette leaf	0.435714285714286	0.8	Medium
AT4G39120	adult vascular leaf	8	8	Medium
AT4G39120	cauline leaf	17	17	Medium
AT4G39120	rosette leaf	17.7142857142857	26	Medium
AT4G39130	adult vascular leaf	0	0	Low
AT4G39130	cauline leaf	0	0	Low
AT4G39130	rosette leaf	0	0	Low
AT4G39150	adult vascular leaf	64	64	High
AT4G39150	cauline leaf	76	76	High
AT4G39150	rosette leaf	55.7857142857143	70	High
AT4G39160	adult vascular leaf	10	10	Medium
AT4G39160	cauline leaf	16	16	Medium
AT4G39160	rosette leaf	13.6428571428571	21	Medium
AT4G39170	adult vascular leaf	19	19	Medium
AT4G39170	cauline leaf	27	27	High
AT4G39170	rosette leaf	27.5714285714286	35	High
AT5G04800	adult vascular leaf	25	25	High
AT5G04800	cauline leaf	30	30	High
AT5G04800	rosette leaf	58.4285714285714	109	High
AT5G04920	adult vascular leaf	79	79	High
AT5G04920	cauline leaf	59	59	High
AT5G04920	rosette leaf	50.5	62	High
AT5G04930	adult vascular leaf	89	89	High
AT5G04930	cauline leaf	43	43	High
AT5G04930	rosette leaf	58.9285714285714	112	High
AT5G04940	adult vascular leaf	11	11	Medium
AT5G04940	cauline leaf	12	12	Medium
AT5G04940	rosette leaf	11.2857142857143	14	Medium
AT5G04950	adult vascular leaf	10	10	Medium
AT5G04950	cauline leaf	30	30	High
AT5G04950	rosette leaf	35.2142857142857	108	High
AT5G04960	adult vascular leaf	0	0	Low
AT5G04960	cauline leaf	0	0	Low
AT5G04960	rosette leaf	0	0	Low
AT5G04970	adult vascular leaf	0	0	Low
AT5G04970	cauline leaf	0	0	Low
AT5G04970	rosette leaf	0.0142857142857143	0.1	Low
AT5G04980	adult vascular leaf	41	41	High
AT5G04980	cauline leaf	14	14	Medium
AT5G04980	rosette leaf	9.85714285714286	26	Medium
AT5G04990	adult vascular leaf	27	27	High
AT5G04990	cauline leaf	36	36	High
AT5G04990	rosette leaf	26.3571428571429	36	High
AT5G05000	adult vascular leaf	11	11	Medium
AT5G05000	cauline leaf	27	27	High
AT5G05000	rosette leaf	2026-05-23	34	High
AT5G05010	adult vascular leaf	95	95	High
AT5G05010	cauline leaf	118	118	High
AT5G05010	rosette leaf	131.642857142857	156	High
AT5G05030	adult vascular leaf	0	0	Low
AT5G05030	cauline leaf	0	0	Low
AT5G05030	rosette leaf	0	0	Low
AT5G05040	adult vascular leaf	0	0	Low
AT5G05040	cauline leaf	0	0	Low
AT5G05040	rosette leaf	0	0	Low
AT5G05070	adult vascular leaf	0.1	0.1	Medium
AT5G05070	cauline leaf	0	0	Low
AT5G05070	rosette leaf	0.0214285714285714	0.2	Medium
AT5G05080	adult vascular leaf	48	48	High
AT5G05080	cauline leaf	71	71	High
AT5G05080	rosette leaf	59.9285714285714	74	High
AT5G05090	adult vascular leaf	0.5	0.5	Medium
AT5G05090	cauline leaf	1	1	Medium
AT5G05090	rosette leaf	0.728571428571429	1	Medium
AT5G05100	adult vascular leaf	92	92	High
AT5G05100	cauline leaf	47	47	High
AT5G05100	rosette leaf	53.5	70	High
AT5G05110	adult vascular leaf	279	279	High
AT5G05110	cauline leaf	112	112	High
AT5G05110	rosette leaf	44.5714285714286	88	High
AT5G05113	adult vascular leaf	0	0	Low
AT5G05113	cauline leaf	0	0	Low
AT5G05113	rosette leaf	0	0	Low
AT5G05120	adult vascular leaf	0	0	Low
AT5G05120	cauline leaf	0	0	Low
AT5G05120	rosette leaf	0.0142857142857143	0.2	Low
AT5G05130	adult vascular leaf	2	2	Medium
AT5G05130	cauline leaf	2	2	Medium
AT5G05130	rosette leaf	2.64285714285714	3	Medium
AT5G05140	adult vascular leaf	101	101	High
AT5G05140	cauline leaf	22	22	Medium
AT5G05140	rosette leaf	38	55	High
AT5G05150	adult vascular leaf	0.2	0.2	Medium
AT5G05150	cauline leaf	0.1	0.1	Medium
AT5G05150	rosette leaf	0.0857142857142857	0.3	Medium
AT5G05160	adult vascular leaf	4	4	Medium
AT5G05160	cauline leaf	8	8	Medium
AT5G05160	rosette leaf	5.76428571428571	10	Medium
AT5G05170	adult vascular leaf	76	76	High
AT5G05170	cauline leaf	124	124	High
AT5G05170	rosette leaf	197.214285714286	273	High
AT5G05180	adult vascular leaf	2	2	Medium
AT5G05180	cauline leaf	4	4	Medium
AT5G05180	rosette leaf	6.85714285714286	9	Medium
AT5G05190	adult vascular leaf	51	51	High
AT5G05190	cauline leaf	5	5	Medium
AT5G05190	rosette leaf	19.2142857142857	47	Medium
AT5G05200	adult vascular leaf	160	160	High
AT5G05200	cauline leaf	266	266	High
AT5G05200	rosette leaf	196.285714285714	252	High
AT5G05210	adult vascular leaf	36	36	High
AT5G05210	cauline leaf	25	25	High
AT5G05210	rosette leaf	30.0714285714286	43	High
AT5G05220	adult vascular leaf	2	2	Medium
AT5G05220	cauline leaf	0	0	Low
AT5G05220	rosette leaf	0.735714285714286	5	Medium
AT5G05230	adult vascular leaf	42	42	High
AT5G05230	cauline leaf	34	34	High
AT5G05230	rosette leaf	22.3571428571429	35	Medium
AT5G05250	adult vascular leaf	2	2	Medium
AT5G05250	cauline leaf	0.7	0.7	Medium
AT5G05250	rosette leaf	24.7857142857143	124	High
AT5G05260	adult vascular leaf	0	0	Low
AT5G05260	cauline leaf	0	0	Low
AT5G05260	rosette leaf	0	0	Low
AT5G05280	adult vascular leaf	0.1	0.1	Medium
AT5G05280	cauline leaf	0	0	Low
AT5G05280	rosette leaf	0.0357142857142857	0.3	Medium
AT5G05290	adult vascular leaf	0	0	Low
AT5G05290	cauline leaf	0	0	Low
AT5G05290	rosette leaf	0.0714285714285714	0.5	Medium
AT5G05300	adult vascular leaf	26	26	High
AT5G05300	cauline leaf	4	4	Medium
AT5G05300	rosette leaf	25.3571428571429	63	High
AT5G05330	adult vascular leaf	0.8	0.8	Medium
AT5G05330	cauline leaf	3	3	Medium
AT5G05330	rosette leaf	4.21428571428571	6	Medium
AT5G05340	adult vascular leaf	32	32	High
AT5G05340	cauline leaf	0.5	0.5	Medium
AT5G05340	rosette leaf	4.75	34	Medium
AT5G05350	adult vascular leaf	0.9	0.9	Medium
AT5G05350	cauline leaf	1	1	Medium
AT5G05350	rosette leaf	0.507142857142857	0.9	Medium
AT5G05360	adult vascular leaf	21	21	Medium
AT5G05360	cauline leaf	26	26	High
AT5G05360	rosette leaf	19.2857142857143	26	Medium
AT5G05365	adult vascular leaf	24	24	High
AT5G05365	cauline leaf	23	23	High
AT5G05365	rosette leaf	8.85714285714286	18	Medium
AT5G05370	adult vascular leaf	80	80	High
AT5G05370	cauline leaf	52	52	High
AT5G05370	rosette leaf	74.4285714285714	97	High
AT5G05380	adult vascular leaf	16	16	Medium
AT5G05380	cauline leaf	11	11	Medium
AT5G05380	rosette leaf	3.85714285714286	6	Medium
AT5G05390	adult vascular leaf	0.6	0.6	Medium
AT5G05390	cauline leaf	2	2	Medium
AT5G05390	rosette leaf	0.235714285714286	0.8	Medium
AT5G05410	adult vascular leaf	130	130	High
AT5G05410	cauline leaf	8	8	Medium
AT5G05410	rosette leaf	15	63	Medium
AT5G05430	adult vascular leaf	3	3	Medium
AT5G05430	cauline leaf	2	2	Medium
AT5G05430	rosette leaf	2026-01-01	6	Medium
AT5G05440	adult vascular leaf	9	9	Medium
AT5G05440	cauline leaf	7	7	Medium
AT5G05440	rosette leaf	14	28	Medium
AT5G05450	adult vascular leaf	9	9	Medium
AT5G05450	cauline leaf	16	16	Medium
AT5G05450	rosette leaf	18.1428571428571	22	Medium
AT5G05460	adult vascular leaf	9	9	Medium
AT5G05460	cauline leaf	19	19	Medium
AT5G05460	rosette leaf	15.1428571428571	20	Medium
AT5G05470	adult vascular leaf	14	14	Medium
AT5G05470	cauline leaf	22	22	Medium
AT5G05470	rosette leaf	19.4285714285714	29	Medium
AT5G05480	adult vascular leaf	6	6	Medium
AT5G05480	cauline leaf	14	14	Medium
AT5G05480	rosette leaf	8.14285714285714	12	Medium
AT5G05490	adult vascular leaf	0.2	0.2	Medium
AT5G05490	cauline leaf	0.1	0.1	Medium
AT5G05490	rosette leaf	0.235714285714286	0.5	Medium
AT5G05500	adult vascular leaf	0	0	Low
AT5G05500	cauline leaf	0.1	0.1	Medium
AT5G05500	rosette leaf	0.0285714285714286	0.2	Medium
AT5G05510	adult vascular leaf	0.2	0.2	Medium
AT5G05510	cauline leaf	0.6	0.6	Medium
AT5G05510	rosette leaf	1.04285714285714	4	Medium
AT5G05520	adult vascular leaf	14	14	Medium
AT5G05520	cauline leaf	20	20	Medium
AT5G05520	rosette leaf	20	29	Medium
AT5G05530	adult vascular leaf	3	3	Medium
AT5G05530	cauline leaf	0.2	0.2	Medium
AT5G05530	rosette leaf	0.128571428571429	0.6	Medium
AT5G05540	adult vascular leaf	12	12	Medium
AT5G05540	cauline leaf	24	24	High
AT5G05540	rosette leaf	21.2142857142857	35	Medium
AT5G05550	adult vascular leaf	4	4	Medium
AT5G05550	cauline leaf	15	15	Medium
AT5G05550	rosette leaf	10.1428571428571	16	Medium
AT5G05570	adult vascular leaf	14	14	Medium
AT5G05570	cauline leaf	12	12	Medium
AT5G05570	rosette leaf	14.7857142857143	18	Medium
AT5G05580	adult vascular leaf	1	1	Medium
AT5G05580	cauline leaf	10	10	Medium
AT5G05580	rosette leaf	35.0714285714286	53	High
AT5G05600	adult vascular leaf	594	594	High
AT5G05600	cauline leaf	18	18	Medium
AT5G05600	rosette leaf	47.2142857142857	145	High
AT5G05610	adult vascular leaf	32	32	High
AT5G05610	cauline leaf	62	62	High
AT5G05610	rosette leaf	53.1428571428571	65	High
AT5G05620	adult vascular leaf	4	4	Medium
AT5G05620	cauline leaf	7	7	Medium
AT5G05620	rosette leaf	11	20	Medium
AT5G05630	adult vascular leaf	1	1	Medium
AT5G05630	cauline leaf	2	2	Medium
AT5G05630	rosette leaf	1.46428571428571	3	Medium
AT5G05640	adult vascular leaf	0.4	0.4	Medium
AT5G05640	cauline leaf	0.1	0.1	Medium
AT5G05640	rosette leaf	0.842857142857143	2	Medium
AT5G05657	adult vascular leaf	0	0	Low
AT5G05657	cauline leaf	0	0	Low
AT5G05657	rosette leaf	0	0	Low
AT5G05660	adult vascular leaf	12	12	Medium
AT5G05660	cauline leaf	12	12	Medium
AT5G05660	rosette leaf	17.5714285714286	20	Medium
AT5G05670	adult vascular leaf	9	9	Medium
AT5G05670	cauline leaf	18	18	Medium
AT5G05670	rosette leaf	19.4285714285714	31	Medium
AT5G05680	adult vascular leaf	8	8	Medium
AT5G05680	cauline leaf	7	7	Medium
AT5G05680	rosette leaf	7.57142857142857	11	Medium
AT5G05690	adult vascular leaf	32	32	High
AT5G05690	cauline leaf	204	204	High
AT5G05690	rosette leaf	124.142857142857	176	High
AT5G05710	adult vascular leaf	14	14	Medium
AT5G05710	cauline leaf	17	17	Medium
AT5G05710	rosette leaf	15.3571428571429	24	Medium
AT5G05730	adult vascular leaf	203	203	High
AT5G05730	cauline leaf	46	46	High
AT5G05730	rosette leaf	97.1428571428571	237	High
AT5G05760	adult vascular leaf	34	34	High
AT5G05760	cauline leaf	18	18	Medium
AT5G05760	rosette leaf	11.7857142857143	22	Medium
AT5G05770	adult vascular leaf	0	0	Low
AT5G05770	cauline leaf	0	0	Low
AT5G05770	rosette leaf	0.05	0.5	Medium
AT5G05780	adult vascular leaf	61	61	High
AT5G05780	cauline leaf	62	62	High
AT5G05780	rosette leaf	74.2142857142857	100	High
AT5G05790	adult vascular leaf	3	3	Medium
AT5G05790	cauline leaf	5	5	Medium
AT5G05790	rosette leaf	4.92857142857143	12	Medium
AT5G05810	adult vascular leaf	0.8	0.8	Medium
AT5G05810	cauline leaf	0.2	0.2	Medium
AT5G05810	rosette leaf	0.428571428571428	0.8	Medium
AT5G05820	adult vascular leaf	8	8	Medium
AT5G05820	cauline leaf	11	11	Medium
AT5G05820	rosette leaf	17.7857142857143	24	Medium
AT5G05830	adult vascular leaf	7	7	Medium
AT5G05830	cauline leaf	20	20	Medium
AT5G05830	rosette leaf	16	25	Medium
AT5G05840	adult vascular leaf	1	1	Medium
AT5G05840	cauline leaf	2	2	Medium
AT5G05840	rosette leaf	1.47857142857143	5	Medium
AT5G05850	adult vascular leaf	19	19	Medium
AT5G05850	cauline leaf	10	10	Medium
AT5G05850	rosette leaf	2026-05-20	30	Medium
AT5G05860	adult vascular leaf	5	5	Medium
AT5G05860	cauline leaf	2	2	Medium
AT5G05860	rosette leaf	34.0714285714286	46	High
AT5G05870	adult vascular leaf	8	8	Medium
AT5G05870	cauline leaf	19	19	Medium
AT5G05870	rosette leaf	17.0714285714286	21	Medium
AT5G05880	adult vascular leaf	0.1	0.1	Medium
AT5G05880	cauline leaf	0.1	0.1	Medium
AT5G05880	rosette leaf	0.35	0.8	Medium
AT5G05890	adult vascular leaf	0.5	0.5	Medium
AT5G05890	cauline leaf	3	3	Medium
AT5G05890	rosette leaf	2026-05-05	10	Medium
AT5G05900	adult vascular leaf	0	0	Low
AT5G05900	cauline leaf	0	0	Low
AT5G05900	rosette leaf	0	0	Low
AT5G05910	adult vascular leaf	0	0	Low
AT5G05910	cauline leaf	0	0	Low
AT5G05910	rosette leaf	0	0	Low
AT5G05920	adult vascular leaf	9	9	Medium
AT5G05920	cauline leaf	13	13	Medium
AT5G05920	rosette leaf	10	13	Medium
AT5G05930	adult vascular leaf	72	72	High
AT5G05930	cauline leaf	27	27	High
AT5G05930	rosette leaf	21.4285714285714	30	Medium
AT5G05940	adult vascular leaf	0	0	Low
AT5G05940	cauline leaf	1	1	Medium
AT5G05940	rosette leaf	2.43571428571429	6	Medium
AT5G05950	adult vascular leaf	17	17	Medium
AT5G05950	cauline leaf	25	25	High
AT5G05950	rosette leaf	15.7857142857143	20	Medium
AT5G05960	adult vascular leaf	2	2	Medium
AT5G05960	cauline leaf	45	45	High
AT5G05960	rosette leaf	2026-05-14	57	Medium
AT5G05965	adult vascular leaf	0	0	Low
AT5G05965	cauline leaf	0	0	Low
AT5G05965	rosette leaf	0.4	2	Medium
AT5G05980	adult vascular leaf	32	32	High
AT5G05980	cauline leaf	43	43	High
AT5G05980	rosette leaf	26.3571428571429	39	High
AT5G05987	adult vascular leaf	49	49	High
AT5G05987	cauline leaf	20	20	Medium
AT5G05987	rosette leaf	13.7142857142857	17	Medium
AT5G05990	adult vascular leaf	10	10	Medium
AT5G05990	cauline leaf	12	12	Medium
AT5G05990	rosette leaf	14.7142857142857	24	Medium
AT5G06000	adult vascular leaf	2	2	Medium
AT5G06000	cauline leaf	2	2	Medium
AT5G06000	rosette leaf	2.92142857142857	8	Medium
AT5G06010	adult vascular leaf	0	0	Low
AT5G06010	cauline leaf	0	0	Low
AT5G06010	rosette leaf	0.0214285714285714	0.3	Medium
AT5G06050	adult vascular leaf	3	3	Medium
AT5G06050	cauline leaf	8	8	Medium
AT5G06050	rosette leaf	12.2142857142857	19	Medium
AT5G06060	adult vascular leaf	32	32	High
AT5G06060	cauline leaf	99	99	High
AT5G06060	rosette leaf	65	90	High
AT5G06070	adult vascular leaf	0	0	Low
AT5G06070	cauline leaf	0	0	Low
AT5G06070	rosette leaf	0	0	Low
AT5G06080	adult vascular leaf	0	0	Low
AT5G06080	cauline leaf	0	0	Low
AT5G06080	rosette leaf	0	0	Low
AT5G06090	adult vascular leaf	0.2	0.2	Medium
AT5G06090	cauline leaf	0	0	Low
AT5G06090	rosette leaf	0	0	Low
AT5G06100	adult vascular leaf	25	25	High
AT5G06100	cauline leaf	19	19	Medium
AT5G06100	rosette leaf	14.1428571428571	18	Medium
AT5G06110	adult vascular leaf	39	39	High
AT5G06110	cauline leaf	38	38	High
AT5G06110	rosette leaf	44.8571428571429	58	High
AT5G06120	adult vascular leaf	26	26	High
AT5G06120	cauline leaf	18	18	Medium
AT5G06120	rosette leaf	17.8571428571429	24	Medium
AT5G06130	adult vascular leaf	92	92	High
AT5G06130	cauline leaf	106	106	High
AT5G06130	rosette leaf	74.2142857142857	99	High
AT5G06140	adult vascular leaf	58	58	High
AT5G06140	cauline leaf	74	74	High
AT5G06140	rosette leaf	67.7142857142857	77	High
AT5G06150	adult vascular leaf	0.1	0.1	Medium
AT5G06150	cauline leaf	2	2	Medium
AT5G06150	rosette leaf	4.85714285714286	21	Medium
AT5G06160	adult vascular leaf	21	21	Medium
AT5G06160	cauline leaf	28	28	High
AT5G06160	rosette leaf	24.4285714285714	36	High
AT5G06190	adult vascular leaf	8	8	Medium
AT5G06190	cauline leaf	15	15	Medium
AT5G06190	rosette leaf	3.42857142857143	6	Medium
AT5G06200	adult vascular leaf	1	1	Medium
AT5G06200	cauline leaf	0.5	0.5	Medium
AT5G06200	rosette leaf	0.164285714285714	0.9	Medium
AT5G06220	adult vascular leaf	26	26	High
AT5G06220	cauline leaf	28	28	High
AT5G06220	rosette leaf	35.0714285714286	46	High
AT5G06230	adult vascular leaf	73	73	High
AT5G06230	cauline leaf	2	2	Medium
AT5G06230	rosette leaf	1.64285714285714	7	Medium
AT5G06240	adult vascular leaf	8	8	Medium
AT5G06240	cauline leaf	23	23	High
AT5G06240	rosette leaf	16.7857142857143	21	Medium
AT5G06270	adult vascular leaf	0.8	0.8	Medium
AT5G06270	cauline leaf	3	3	Medium
AT5G06270	rosette leaf	3.64285714285714	10	Medium
AT5G06280	adult vascular leaf	34	34	High
AT5G06280	cauline leaf	58	58	High
AT5G06280	rosette leaf	21.8571428571429	36	Medium
AT5G06290	adult vascular leaf	14	14	Medium
AT5G06290	cauline leaf	84	84	High
AT5G06290	rosette leaf	261.285714285714	469	High
AT5G06300	adult vascular leaf	25	25	High
AT5G06300	cauline leaf	4	4	Medium
AT5G06300	rosette leaf	7.92857142857143	25	Medium
AT5G06310	adult vascular leaf	3	3	Medium
AT5G06310	cauline leaf	4	4	Medium
AT5G06310	rosette leaf	4.07142857142857	6	Medium
AT5G06320	adult vascular leaf	790	790	High
AT5G06320	cauline leaf	81	81	High
AT5G06320	rosette leaf	446.714285714286	846	High
AT5G06340	adult vascular leaf	28	28	High
AT5G06340	cauline leaf	116	116	High
AT5G06340	rosette leaf	120.428571428571	147	High
AT5G06350	adult vascular leaf	10	10	Medium
AT5G06350	cauline leaf	11	11	Medium
AT5G06350	rosette leaf	2026-05-11	17	Medium
AT5G06360	adult vascular leaf	65	65	High
AT5G06360	cauline leaf	73	73	High
AT5G06360	rosette leaf	81.6428571428571	144	High
AT5G06370	adult vascular leaf	142	142	High
AT5G06370	cauline leaf	63	63	High
AT5G06370	rosette leaf	42.2142857142857	74	High
AT5G06380	adult vascular leaf	0	0	Low
AT5G06380	cauline leaf	0.5	0.5	Medium
AT5G06380	rosette leaf	0.114285714285714	0.6	Medium
AT5G06390	adult vascular leaf	6	6	Medium
AT5G06390	cauline leaf	19	19	Medium
AT5G06390	rosette leaf	26.5714285714286	40	High
AT5G06400	adult vascular leaf	0.7	0.7	Medium
AT5G06400	cauline leaf	0.8	0.8	Medium
AT5G06400	rosette leaf	0.742857142857143	1	Medium
AT5G06410	adult vascular leaf	6	6	Medium
AT5G06410	cauline leaf	11	11	Medium
AT5G06410	rosette leaf	9.28571428571429	12	Medium
AT5G06430	adult vascular leaf	6	6	Medium
AT5G06430	cauline leaf	10	10	Medium
AT5G06430	rosette leaf	7.78571428571429	12	Medium
AT5G06440	adult vascular leaf	30	30	High
AT5G06440	cauline leaf	39	39	High
AT5G06440	rosette leaf	32.4285714285714	47	High
AT5G06450	adult vascular leaf	15	15	Medium
AT5G06450	cauline leaf	26	26	High
AT5G06450	rosette leaf	17.7142857142857	22	Medium
AT5G06460	adult vascular leaf	22	22	Medium
AT5G06460	cauline leaf	19	19	Medium
AT5G06460	rosette leaf	18.2857142857143	26	Medium
AT5G06470	adult vascular leaf	0.5	0.5	Medium
AT5G06470	cauline leaf	3	3	Medium
AT5G06470	rosette leaf	2.48571428571429	7	Medium
AT5G06480	adult vascular leaf	4	4	Medium
AT5G06480	cauline leaf	6	6	Medium
AT5G06480	rosette leaf	5.07142857142857	8	Medium
AT5G08695	adult vascular leaf	0	0	Low
AT5G08695	cauline leaf	0	0	Low
AT5G08695	rosette leaf	0	0	Low
AT5G16930	adult vascular leaf	3	3	Medium
AT5G16930	cauline leaf	4	4	Medium
AT5G16930	rosette leaf	2026-05-04	10	Medium
AT5G16940	adult vascular leaf	6	6	Medium
AT5G16940	cauline leaf	15	15	Medium
AT5G16940	rosette leaf	11.1428571428571	14	Medium
AT5G16950	adult vascular leaf	11	11	Medium
AT5G16950	cauline leaf	17	17	Medium
AT5G16950	rosette leaf	12.7142857142857	20	Medium
AT5G16960	adult vascular leaf	16	16	Medium
AT5G16960	cauline leaf	0.6	0.6	Medium
AT5G16960	rosette leaf	0.45	2	Medium
AT5G16970	adult vascular leaf	1357	1357	High
AT5G16970	cauline leaf	100	100	High
AT5G16970	rosette leaf	72.0714285714286	188	High
AT5G16990	adult vascular leaf	49	49	High
AT5G16990	cauline leaf	51	51	High
AT5G16990	rosette leaf	23.2857142857143	33	High
AT5G17000	adult vascular leaf	112	112	High
AT5G17000	cauline leaf	48	48	High
AT5G17000	rosette leaf	28.2142857142857	63	High
AT5G17010	adult vascular leaf	22	22	Medium
AT5G17010	cauline leaf	23	23	High
AT5G17010	rosette leaf	2026-05-14	22	Medium
AT5G17020	adult vascular leaf	54	54	High
AT5G17020	cauline leaf	38	38	High
AT5G17020	rosette leaf	46.1428571428571	60	High
AT5G17030	adult vascular leaf	0.1	0.1	Medium
AT5G17030	cauline leaf	0	0	Low
AT5G17030	rosette leaf	0.0428571428571429	0.3	Medium
AT5G17050	adult vascular leaf	135	135	High
AT5G17050	cauline leaf	18	18	Medium
AT5G17050	rosette leaf	17.0714285714286	28	Medium
AT5G17060	adult vascular leaf	60	60	High
AT5G17060	cauline leaf	21	21	Medium
AT5G17060	rosette leaf	16.7142857142857	29	Medium
AT5G17070	adult vascular leaf	17	17	Medium
AT5G17070	cauline leaf	19	19	Medium
AT5G17070	rosette leaf	18.6428571428571	25	Medium
AT5G17090	adult vascular leaf	0	0	Low
AT5G17090	cauline leaf	0	0	Low
AT5G17090	rosette leaf	0	0	Low
AT5G17100	adult vascular leaf	0	0	Low
AT5G17100	cauline leaf	0	0	Low
AT5G17100	rosette leaf	0	0	Low
AT5G17120	adult vascular leaf	0	0	Low
AT5G17120	cauline leaf	0	0	Low
AT5G17120	rosette leaf	0	0	Low
AT5G17130	adult vascular leaf	0	0	Low
AT5G17130	cauline leaf	0	0	Low
AT5G17130	rosette leaf	0	0	Low
AT5G17140	adult vascular leaf	0	0	Low
AT5G17140	cauline leaf	0	0	Low
AT5G17140	rosette leaf	0	0	Low
AT5G17160	adult vascular leaf	0.5	0.5	Medium
AT5G17160	cauline leaf	2	2	Medium
AT5G17160	rosette leaf	4.32857142857143	17	Medium
AT5G17165	adult vascular leaf	0.4	0.4	Medium
AT5G17165	cauline leaf	9	9	Medium
AT5G17165	rosette leaf	2.26428571428571	5	Medium
AT5G17170	adult vascular leaf	48	48	High
AT5G17170	cauline leaf	259	259	High
AT5G17170	rosette leaf	139	206	High
AT5G17180	adult vascular leaf	0.3	0.3	Medium
AT5G17180	cauline leaf	0	0	Low
AT5G17180	rosette leaf	0	0	Low
AT5G17190	adult vascular leaf	151	151	High
AT5G17190	cauline leaf	108	108	High
AT5G17190	rosette leaf	77.9285714285714	103	High
AT5G17210	adult vascular leaf	8	8	Medium
AT5G17210	cauline leaf	4	4	Medium
AT5G17210	rosette leaf	2.71428571428571	4	Medium
AT5G17220	adult vascular leaf	646	646	High
AT5G17220	cauline leaf	0.6	0.6	Medium
AT5G17220	rosette leaf	2.26428571428571	7	Medium
AT5G17240	adult vascular leaf	3	3	Medium
AT5G17240	cauline leaf	6	6	Medium
AT5G17240	rosette leaf	6.92857142857143	14	Medium
AT5G17250	adult vascular leaf	5	5	Medium
AT5G17250	cauline leaf	6	6	Medium
AT5G17250	rosette leaf	6.07142857142857	8	Medium
AT5G17260	adult vascular leaf	0.1	0.1	Medium
AT5G17260	cauline leaf	0.6	0.6	Medium
AT5G17260	rosette leaf	0.642857142857143	2	Medium
AT5G17270	adult vascular leaf	7	7	Medium
AT5G17270	cauline leaf	15	15	Medium
AT5G17270	rosette leaf	2026-05-09	15	Medium
AT5G17290	adult vascular leaf	37	37	High
AT5G17290	cauline leaf	23	23	High
AT5G17290	rosette leaf	15.6428571428571	28	Medium
AT5G17300	adult vascular leaf	7	7	Medium
AT5G17300	cauline leaf	29	29	High
AT5G17300	rosette leaf	39.9285714285714	93	High
AT5G17310	adult vascular leaf	10	10	Medium
AT5G17310	cauline leaf	26	26	High
AT5G17310	rosette leaf	31	53	High
AT5G17320	adult vascular leaf	0	0	Low
AT5G17320	cauline leaf	0	0	Low
AT5G17320	rosette leaf	0.00714285714285714	0.1	Low
AT5G17330	adult vascular leaf	29	29	High
AT5G17330	cauline leaf	5	5	Medium
AT5G17330	rosette leaf	6.75714285714286	36	Medium
AT5G17340	adult vascular leaf	0	0	Low
AT5G17340	cauline leaf	0	0	Low
AT5G17340	rosette leaf	0	0	Low
AT5G17350	adult vascular leaf	27	27	High
AT5G17350	cauline leaf	2	2	Medium
AT5G17350	rosette leaf	7.22857142857143	19	Medium
AT5G17360	adult vascular leaf	0.5	0.5	Medium
AT5G17360	cauline leaf	1	1	Medium
AT5G17360	rosette leaf	1.22142857142857	2	Medium
AT5G17370	adult vascular leaf	15	15	Medium
AT5G17370	cauline leaf	9	9	Medium
AT5G17370	rosette leaf	6.42857142857143	10	Medium
AT5G17380	adult vascular leaf	726	726	High
AT5G17380	cauline leaf	100	100	High
AT5G17380	rosette leaf	57.8571428571429	124	High
AT5G17390	adult vascular leaf	28	28	High
AT5G17390	cauline leaf	0.4	0.4	Medium
AT5G17390	rosette leaf	0.2	1	Medium
AT5G17400	adult vascular leaf	10	10	Medium
AT5G17400	cauline leaf	16	16	Medium
AT5G17400	rosette leaf	14.2857142857143	21	Medium
AT5G17410	adult vascular leaf	7	7	Medium
AT5G17410	cauline leaf	12	12	Medium
AT5G17410	rosette leaf	11.5714285714286	15	Medium
AT5G17420	adult vascular leaf	0.3	0.3	Medium
AT5G17420	cauline leaf	5	5	Medium
AT5G17420	rosette leaf	2026-07-03	8	Medium
AT5G17430	adult vascular leaf	0	0	Low
AT5G17430	cauline leaf	0	0	Low
AT5G17430	rosette leaf	0	0	Low
AT5G17440	adult vascular leaf	38	38	High
AT5G17440	cauline leaf	35	35	High
AT5G17440	rosette leaf	22.0714285714286	31	Medium
AT5G17450	adult vascular leaf	73	73	High
AT5G17450	cauline leaf	32	32	High
AT5G17450	rosette leaf	10.5714285714286	25	Medium
AT5G17460	adult vascular leaf	54	54	High
AT5G17460	cauline leaf	5	5	Medium
AT5G17460	rosette leaf	11.3571428571429	22	Medium
AT5G17470	adult vascular leaf	0	0	Low
AT5G17470	cauline leaf	0	0	Low
AT5G17470	rosette leaf	0	0	Low
AT5G17480	adult vascular leaf	0	0	Low
AT5G17480	cauline leaf	0	0	Low
AT5G17480	rosette leaf	0	0	Low
AT5G17490	adult vascular leaf	0.8	0.8	Medium
AT5G17490	cauline leaf	1	1	Medium
AT5G17490	rosette leaf	3.42857142857143	7	Medium
AT5G17500	adult vascular leaf	0	0	Low
AT5G17500	cauline leaf	0	0	Low
AT5G17500	rosette leaf	0	0	Low
AT5G17510	adult vascular leaf	26	26	High
AT5G17510	cauline leaf	24	24	High
AT5G17510	rosette leaf	19.4285714285714	26	Medium
AT5G17540	adult vascular leaf	1	1	Medium
AT5G17540	cauline leaf	1	1	Medium
AT5G17540	rosette leaf	0.678571428571429	1	Medium
AT5G17550	adult vascular leaf	56	56	High
AT5G17550	cauline leaf	50	50	High
AT5G17550	rosette leaf	32.4285714285714	48	High
AT5G17560	adult vascular leaf	47	47	High
AT5G17560	cauline leaf	71	71	High
AT5G17560	rosette leaf	67.9285714285714	83	High
AT5G17580	adult vascular leaf	3	3	Medium
AT5G17580	cauline leaf	5	5	Medium
AT5G17580	rosette leaf	4.21428571428571	6	Medium
AT5G17590	adult vascular leaf	0	0	Low
AT5G17590	cauline leaf	0	0	Low
AT5G17590	rosette leaf	0	0	Low
AT5G17600	adult vascular leaf	14	14	Medium
AT5G17600	cauline leaf	12	12	Medium
AT5G17600	rosette leaf	7.21428571428571	16	Medium
AT5G17610	adult vascular leaf	24	24	High
AT5G17610	cauline leaf	35	35	High
AT5G17610	rosette leaf	29.7142857142857	42	High
AT5G17620	adult vascular leaf	3	3	Medium
AT5G17620	cauline leaf	8	8	Medium
AT5G17620	rosette leaf	11.0714285714286	19	Medium
AT5G17630	adult vascular leaf	11	11	Medium
AT5G17630	cauline leaf	20	20	Medium
AT5G17630	rosette leaf	26.4285714285714	33	High
AT5G17640	adult vascular leaf	15	15	Medium
AT5G17640	cauline leaf	17	17	Medium
AT5G17640	rosette leaf	15.7142857142857	20	Medium
AT5G37130	adult vascular leaf	25	25	High
AT5G37130	cauline leaf	29	29	High
AT5G37130	rosette leaf	27.1428571428571	39	High
AT5G42560	adult vascular leaf	75	75	High
AT5G42560	cauline leaf	57	57	High
AT5G42560	rosette leaf	38.9285714285714	46	High
AT5G43610	adult vascular leaf	0	0	Low
AT5G43610	cauline leaf	0	0	Low
AT5G43610	rosette leaf	0.00714285714285714	0.1	Low
AT5G43755	adult vascular leaf	0	0	Low
AT5G43755	cauline leaf	0	0	Low
AT5G43755	rosette leaf	0.05	0.3	Medium
