# Supplementary material
Source: Research Square preprint supplement (doi:10.21203/rs.3.rs-9557974/v1)
Supplement: Supplementary file 3 [file eff6a33e6a5208eea3b62f3b.docx]

| *Tab 2. Promising candidate genes among the 15 loci identified independently by both the BSA-QTL and FST approaches in relation to serpentine adaptation* | | |
| --- | --- | --- |
|  |  |  |
| **ID** | **Name** | **Function** |
| AT4G38800 | *Methylthioadenosine nucleosidase 1 (MTN1)* | Enzyme of the methionine cycle (Bürstenbinder et al. 2010) |
| AT4G38190 | *Cellulose synthase like D4 (CSLD4)* | Cellulose deposition and normal growth (Wang et al. 2011) |
| AT5G04970 | *Pectinesterase/pectinesterase inhibitor 47 (PMEI-PME47)* | Modification of cell walls via demethylesterification of cell wall pectin (UniProtKB: Q9FF77) |
| AT4G38270 | *GAUT3* | Involved in pectin or xylan biosynthesis (Caffall et al. 2009) |
| AT5G17620 | *Augmin subunit 7 (AUG7)* | Binds to microtubules and is involved in phragmoplast creation (Schmidt-Marcec et al. 2024) |
| AT4G38420 | *SKS9* | Cell wall protein, putative pectinesterase (Bayer et al.  2006) |
| AT4G38200 | *BIG1* | ARF guanine-nucleotide exchange factor, regulates post-Golgi trafficking and secretion (Richter et al. 2014) |
| AT4G38430 | *ROP guanine nucleotide exchange factor 1 (ROPGEF1)* | Regulation of polar auxin transport (Liu et al. 2017) |
| AT4G39100 | *SHORT LIFE (SHL)* | Regulation of flowering |
|  |  | (López-González et al. 2014) |
| AT2G21070 | *FIONA1* | Regulation of flowering (Cai et al. 2023) |
